# Supplementary material for: Rare-earth metal ethylene and ethyne complexes
Source: Royal Society of Chemistry journal article supplement (doi:10.1039/d3sc06599e), 2024-01-01
Supplement: d3sc06599e1.pdf [file d3sc06599e1.pdf]

## ***Supporting Information***

### **Rare-earth metal ethylene and ethyne complexes**

*Wen Jiang,<sup>1</sup> Thayalan Rajeshkumar,<sup>2</sup> Mengyue Guo,<sup>1</sup> Yuejian Lin,<sup>1</sup> Laurent Maron,<sup>\* 2</sup> and Lixin Zhang<sup>\* 1</sup>*

---

[1] Department of Chemistry, Shanghai Key Laboratory of Molecular Catalysis and Innovative Materials, Jiangwan Campus, Fudan University, Shanghai, 200438, China.

[2] LPCNO, Université de Toulouse, 31077 Toulouse, France.

---

### **Table of Contents**

General procedure (page 1)

Experimental section (page 2 to 5)

NMR spectra of all complexes (page 6 to 18)

Crystal data of selected complexes (page 19 to 21)

Computational details (page 22-95)

References (page 96)

## General procedure

All manipulations were performed with rigorous exclusion of air and water, using Schlenk techniques or an MBRAUN glovebox (Unilab Mbraun; <1 ppm O<sub>2</sub>, <1 ppm H<sub>2</sub>O). Toluene, THF, and hexane were purified using Grubbs-type columns (MBraun SPS-800, solvent purification system), then further dried over fresh Na chips and stored in a glovebox. The AlEt<sub>3</sub> (1 mol L<sup>-1</sup> in hexane) was purchased from J&K Co., Ltd and used without purification. Benzene-d<sub>6</sub> was obtained from J&K Co., Ltd and dried by using sodium chips. The combustion method was used for the carbon, hydrogen, and nitrogen analyses on an Elementar Vario EL III analyzer at Fudan University (China).

## Experimental section

### Syntheses of complexes 1-5.

**[[PhCH<sub>2</sub>]<sub>2</sub>NC(NC<sub>6</sub>H<sub>3</sub><sup>*i*</sup>Pr<sub>2</sub>-2,6)<sub>2</sub>]Y(μ<sub>2</sub>-η<sup>1</sup>:η<sup>2</sup>-Et)(Et)<sub>2</sub> (1-Y).** A toluene solution (2 mL) of AlEt<sub>3</sub> (1.0 mL, 1 M in hexane, 1 mmol) was added slowly to a stirred solution of [(PhCH<sub>2</sub>)<sub>2</sub>NC(NC<sub>6</sub>H<sub>3</sub><sup>*i*</sup>Pr<sub>2</sub>-2,6)<sub>2</sub>]Y(o-CH<sub>2</sub>C<sub>6</sub>H<sub>4</sub>NMe<sub>2</sub>)<sub>2</sub> (0.46 g, 0.50 mmol) in toluene (10 mL) at ambient temperature. The reaction mixture was allowed to stir for 3 h, and a large amount of white powder precipitated. Then, the white residue was collected by filtration. The white powder was washed twice with toluene/hexane, and dried. Crystallization in toluene yields **1-Y** (0.25 g, 71%) as colorless crystals. <sup>1</sup>H NMR (400 MHz, C<sub>6</sub>D<sub>6</sub>, 25 °C): δ (ppm) = 0.59 (q, <sup>3</sup>J<sub>H-H</sub> = 8 Hz, 8H, CH<sub>2</sub>CH<sub>3</sub>), 1.16 (d, <sup>3</sup>J<sub>H-H</sub> = 8 Hz, 24H, CHMe<sub>2</sub>), 1.44 (d, <sup>3</sup>J<sub>H-H</sub> = 8 Hz, 24H, CHMe<sub>2</sub>), 1.51 (t, <sup>3</sup>J<sub>H-H</sub> = 8 Hz, 12H, CH<sub>2</sub>CH<sub>3</sub>), 3.92 (m, 8H, CHMe<sub>2</sub>), 4.07 (s, 8H, CH<sub>2</sub>Ph), 6.85-7.00 (m, 24H, Ar), 7.06-7.08 (m, 8H, Ar). <sup>13</sup>C{<sup>1</sup>H} NMR (100 MHz, C<sub>6</sub>D<sub>6</sub>, 25 °C): δ (ppm) = 13.1 (s, CH<sub>2</sub>CH<sub>3</sub>), 24.5 (s, CHMe<sub>2</sub>), 26.5 (s, CHMe<sub>2</sub>), 28.2 (s, CHMe<sub>2</sub>), 40.9 (s, CH<sub>2</sub>CH<sub>3</sub>), 51.4 (s, CH<sub>2</sub>Ph), 124.3 (s, Ar), 124.4 (s, Ar), 127.4 (s, Ar), 128.4 (s, Ar), 129.1 (s, Ar), 136.6 (s, Ar), 142.4 (s, Ar), 144.3 (s, Ar), 164.9 (s, NCN). Anal. Calcd for C<sub>86</sub>H<sub>116</sub>N<sub>6</sub>Y<sub>2</sub> (%): C, 73.17; H, 8.28; N, 5.95; Found: C, 73.02; H, 8.20; N, 6.05.

**[[PhCH<sub>2</sub>]<sub>2</sub>NC(NC<sub>6</sub>H<sub>3</sub><sup>*i*</sup>Pr<sub>2</sub>-2,6)<sub>2</sub>]Lu(μ<sub>2</sub>-η<sup>1</sup>:η<sup>2</sup>-Et)(Et)<sub>2</sub> (1-Lu).** A toluene solution (2 mL) of AlEt<sub>3</sub> (1.0 mL, 1 M in hexane, 1 mmol) was added slowly to a stirred solution of [(PhCH<sub>2</sub>)<sub>2</sub>NC(NC<sub>6</sub>H<sub>3</sub><sup>*i*</sup>Pr<sub>2</sub>-2,6)<sub>2</sub>]Lu(o-CH<sub>2</sub>C<sub>6</sub>H<sub>4</sub>NMe<sub>2</sub>)<sub>2</sub> (0.50 g, 0.5 mmol) in toluene (10 mL) at ambient temperature. The reaction mixture was allowed to stir for 3 h, and a large amount of white powder precipitated. Then, the white residue was collected by filtration. The white powder was washed twice with toluene/hexane, and dried. Crystallization in toluene to yields **1-Lu** (0.31 g, 78%) as colorless crystals. <sup>1</sup>H NMR (400 MHz, C<sub>6</sub>D<sub>6</sub>, 25 °C): δ (ppm) = 0.86 (br, 8H, CH<sub>2</sub>CH<sub>3</sub>), 1.16 (d, <sup>3</sup>J<sub>H-H</sub> = 4 Hz, 24H, CHMe<sub>2</sub>), 1.46 (d, <sup>3</sup>J<sub>H-H</sub> = 4 Hz, 24H, CHMe<sub>2</sub>), 1.51 (br, 12H, CH<sub>2</sub>CH<sub>3</sub>), 3.95 (m, 8H, CHMe<sub>2</sub>), 4.07 (s, 8H, CH<sub>2</sub>Ph), 6.85-6.87 (m, 7H, Ar), 6.93-6.98 (m, 16H, Ar), 7.06-7.08 (m, 9H, Ar). <sup>13</sup>C{<sup>1</sup>H} NMR (100 MHz, C<sub>6</sub>D<sub>6</sub>, 25 °C): δ (ppm) = 13.4 (s, CH<sub>2</sub>CH<sub>3</sub>), 24.7 (s, CHMe<sub>2</sub>), 26.8 (s, CHMe<sub>2</sub>), 28.2 (s, CHMe<sub>2</sub>), 51.5 (s, CH<sub>2</sub>CH<sub>3</sub>), 51.6 (s, CH<sub>2</sub>Ph), 124.5 (s, Ar), 124.6 (s, Ar), 127.5 (s, Ar), 128.5 (s, Ar), 129.3 (s, Ar), 136.6 (s, Ar), 142.7 (s, Ar), 144.0 (s, Ar), 164.9 (s, NCN). Anal. Calcd for C<sub>86</sub>H<sub>116</sub>N<sub>6</sub>Lu<sub>2</sub> (%): C, 65.22; H, 7.38; N, 5.31; Found: C, 65.10; H, 7.26; N, 5.06.

**[(PhCH<sub>2</sub>)<sub>2</sub>NC(NC<sub>6</sub>H<sub>3</sub><sup>*i*</sup>Pr<sub>2</sub>-2,6)<sub>2</sub>]Y(Et)(μ<sub>2</sub>-η<sup>1</sup>:η<sup>2</sup>-Et)(μ<sub>2</sub>-η<sup>1</sup>-Et)(AlEt<sub>2</sub>) (2-Y).** A toluene solution (2 mL) of AlEt<sub>3</sub> (1.5 mL, 1 M in hexane, 1.5 mmol) was added slowly to a stirred solution of [(PhCH<sub>2</sub>)<sub>2</sub>NC(NC<sub>6</sub>H<sub>3</sub><sup>*i*</sup>Pr<sub>2</sub>-2,6)<sub>2</sub>]Y(o-CH<sub>2</sub>C<sub>6</sub>H<sub>4</sub>NMe<sub>2</sub>)<sub>2</sub> (0.46 g, 0.5 mmol) in toluene (10 mL) at ambient temperature. The reaction mixture was allowed to stir at ambient temperature for 3 h. The toluene was removed under vacuum, and the oily yellow residue turned to white powder after washing twice with hexane (2 mL), which was collected by filtration and dried. Crystallization in toluene and stored at -35 °C to yield **2-Y** (0.34 g, 83%) as colorless crystals. <sup>1</sup>H NMR (400 MHz, C<sub>6</sub>D<sub>6</sub>, 25 °C): δ (ppm) = 0.33 (q, 8H, <sup>3</sup>J<sub>H-H</sub> = 8 Hz, [AlCH<sub>2</sub>CH<sub>3</sub>]<sup>-</sup>), 0.85 (q, <sup>3</sup>J<sub>H-H</sub> = 8 Hz, 2H, YCH<sub>2</sub>CH<sub>3</sub>), 1.13 (d, <sup>3</sup>J<sub>H-H</sub> = 4 Hz, 12H, CHMe<sub>2</sub>), 1.30 (t, <sup>3</sup>J<sub>H-H</sub> = 8 Hz, 12H, [AlCH<sub>2</sub>CH<sub>3</sub>]<sup>-</sup>), 1.35 (d, <sup>3</sup>J<sub>H-H</sub> = 8 Hz, 12H, CHMe<sub>2</sub>), 1.78 (t, <sup>3</sup>J<sub>H-H</sub> = 8 Hz, 3H, YCH<sub>2</sub>CH<sub>3</sub>), 3.82 (br, 4H, CHMe<sub>2</sub>), 4.00 (s, 4H, CH<sub>2</sub>Ph), 6.82-6.84 (m, 4H, Ar), 6.95-7.03 (m, 8H, Ar), 7.07-7.08 (m, 4H, Ar). <sup>13</sup>C{<sup>1</sup>H} NMR (100 MHz, C<sub>6</sub>D<sub>6</sub>, 25 °C): δ (ppm)

= 10.5 (s, [AlCH<sub>2</sub>CH<sub>3</sub>]<sup>-</sup>), 10.8 (s, [AlCH<sub>2</sub>CH<sub>3</sub>]<sup>-</sup>), 14.1 (s, YCH<sub>2</sub>CH<sub>3</sub>), 24.4 (s, CHMe<sub>2</sub>), 26.6 (s, CHMe<sub>2</sub>), 28.5 (s, CHMe<sub>2</sub>), 39.1 (d, *J*<sub>Y-C</sub> = 56 Hz, YCH<sub>2</sub>CH<sub>3</sub>), 51.4 (s, CH<sub>2</sub>Ph), 124.7 (s, Ar), 125.1 (s, Ar), 127.7 (s, Ar), 128.6 (s, Ar), 129.0 (s, Ar), 136.2 (s, Ar), 142.6 (s, Ar), 142.8 (s, Ar), 164.9 (s, NCN). <sup>89</sup>Y NMR (24.5 MHz, C<sub>6</sub>D<sub>6</sub>, 25 °C): δ = 850.1 ppm. Anal. Calcd for C<sub>49</sub>H<sub>73</sub>N<sub>3</sub>AlY (%): C, 71.77; H, 8.97; N, 5.12; Found: C, 71.62; H, 9.10; N, 5.05.

**[(PhCH<sub>2</sub>)<sub>2</sub>NC(NC<sub>6</sub>H<sub>3</sub><sup>i</sup>Pr<sub>2</sub>-2,6)]Lu(Et)(μ<sub>2</sub>-η<sup>1</sup>:η<sup>2</sup>-Et)(μ<sub>2</sub>-η<sup>1</sup>-Et)(AlEt<sub>2</sub>) (2-Lu).** A toluene solution (2 mL) of AlEt<sub>3</sub> (1.5 mL, 1 M in hexane, 1.5 mmol) was added slowly to a stirred solution of [(PhCH<sub>2</sub>)<sub>2</sub>NC(NC<sub>6</sub>H<sub>3</sub><sup>i</sup>Pr<sub>2</sub>-2,6)]Lu(*o*-CH<sub>2</sub>C<sub>6</sub>H<sub>4</sub>NMe<sub>2</sub>)<sub>2</sub> (0.50 g, 0.5 mmol) in toluene (10 mL) at ambient temperature. The reaction mixture was allowed to stir at ambient temperature for 3 h. The toluene was removed under vacuum, and the oily yellow residue turned to white powder after washing twice with hexane (2 mL), which was collected by filtration and dried. Crystallization in toluene and stored at -35 °C to yield **2-Lu** (0.41 g, 90%) as colorless crystals. <sup>1</sup>H NMR (400 MHz, C<sub>6</sub>D<sub>6</sub>, 25 °C): δ (ppm) = 0.53 (q, <sup>3</sup>*J*<sub>H-H</sub> = 8 Hz, 8H, [AlCH<sub>2</sub>CH<sub>3</sub>]<sup>-</sup>), 0.86 (q, <sup>3</sup>*J*<sub>H-H</sub> = 8 Hz, 2H, LuCH<sub>2</sub>CH<sub>3</sub>), 1.12 (br, 12H, CHMe<sub>2</sub>), 1.28 (t, <sup>3</sup>*J*<sub>H-H</sub> = 8 Hz, 12H, [AlCH<sub>2</sub>CH<sub>3</sub>]<sup>-</sup>), 1.37 (br, 12H, CHMe<sub>2</sub>), 1.84 (t, <sup>3</sup>*J*<sub>H-H</sub> = 8 Hz, 3H, LuCH<sub>2</sub>CH<sub>3</sub>), 3.82 (br, 4H, CHMe<sub>2</sub>), 3.99 (s, 4H, CH<sub>2</sub>Ph), 6.81-6.83 (m, 4H, Ar), 6.94-7.02 (m, 8H, Ar), 7.07-7.09 (m, 4H, Ar). <sup>13</sup>C{<sup>1</sup>H} NMR (100 MHz, C<sub>6</sub>D<sub>6</sub>, 25 °C): δ (ppm) = 10.9 (s, [AlCH<sub>2</sub>CH<sub>3</sub>]<sup>-</sup>), 12.8 (s, [AlCH<sub>2</sub>CH<sub>3</sub>]<sup>-</sup>), 14.4 (s, LuCH<sub>2</sub>CH<sub>3</sub>), 24.4 (s, CHMe<sub>2</sub>), 26.6 (s, CHMe<sub>2</sub>), 28.4 (s, CHMe<sub>2</sub>), 44.2 (s, LuCH<sub>2</sub>CH<sub>3</sub>), 51.3 (s, CH<sub>2</sub>Ph), 124.7 (s, Ar), 125.3 (s, Ar), 127.7 (s, Ar), 128.7 (s, Ar), 129.0 (s, Ar), 136.1 (s, Ar), 142.7 (s, Ar), 164.6 (s, NCN). Anal. Calcd for C<sub>49</sub>H<sub>73</sub>N<sub>3</sub>AlLu (%): C, 64.95; H, 8.12; N, 4.64; Found: C, 65.02; H, 8.20; N, 4.60.

**[[PhCH<sub>2</sub>)<sub>2</sub>NC(NC<sub>6</sub>H<sub>3</sub><sup>i</sup>Pr<sub>2</sub>-2,6)]Y(μ<sub>2</sub>-η<sup>1</sup>-Et)<sub>2</sub>(AlEt)<sub>2</sub>(μ<sub>4</sub>-η<sup>1</sup>:η<sup>1</sup>:η<sup>2</sup>:η<sup>2</sup>-CHCH) (3-Y).**

A toluene solution (2 mL) of AlEt<sub>3</sub> (1.5 mL, 1 M in hexane, 1.5 mmol) was added slowly to a stirred toluene solution (10 mL) of [(PhCH<sub>2</sub>)<sub>2</sub>NC(NC<sub>6</sub>H<sub>3</sub><sup>i</sup>Pr<sub>2</sub>-2,6)]Y(*o*-CH<sub>2</sub>C<sub>6</sub>H<sub>4</sub>NMe<sub>2</sub>)<sub>2</sub> (0.46 g, 0.5 mmol) at ambient temperature. The solution changed red from colorless when the reaction mixture was allowed to stir at ambient temperature for three days. The toluene was removed under vacuum, and the pale red residue turned to orange powder after washing twice with hexane (2 mL), which was collected by filtration and dried. Crystallization in toluene/hexane and stored at -35 °C to yield **3-Y** (0.15 g, 38%) as red crystals. <sup>1</sup>H NMR (400 MHz, C<sub>6</sub>D<sub>6</sub>, 25 °C): δ (ppm) = 0.33 (br, 12H, [AlCH<sub>2</sub>CH<sub>3</sub>]<sup>-</sup>), 1.19 (d, <sup>3</sup>*J*<sub>H-H</sub> = 8 Hz, 24H, CHMe<sub>2</sub>), 1.34 (d, <sup>3</sup>*J*<sub>H-H</sub> = 8 Hz, 24H, CHMe<sub>2</sub>), 1.40 (t, <sup>3</sup>*J*<sub>H-H</sub> = 8 Hz, 18H, [AlCH<sub>2</sub>CH<sub>3</sub>]<sup>-</sup>), 2.66 (s, 2H, μ<sub>4</sub>-CH-CH), 3.80 (m, 8H, CHMe<sub>2</sub>), 4.08 (s, 8H, CH<sub>2</sub>Ph), 6.74-6.79 (m, 8H, Ar), 6.91-6.93 (m, 12H, Ar), 7.00-7.04 (m, 4H, Ar), 7.09-7.11 (m, 8H, Ar). <sup>13</sup>C{<sup>1</sup>H} NMR (100 MHz, C<sub>6</sub>D<sub>6</sub>, 25 °C): δ (ppm) = 11.4 (s, [AlCH<sub>2</sub>CH<sub>3</sub>]<sup>-</sup>), 11.7 (s, [AlCH<sub>2</sub>CH<sub>3</sub>]<sup>-</sup>), 24.2 (s, CHMe<sub>2</sub>), 26.9 (s, CHMe<sub>2</sub>), 28.5 (s, CHMe<sub>2</sub>), 51.9 (s, CH<sub>2</sub>Ph), 89.8 (s, μ<sub>4</sub>-CH-CH), 124.1 (s, Ar), 124.2 (s, Ar), 124.3 (s, Ar), 127.4 (s, Ar), 127.8 (s, Ar), 128.0 (s, Ar), 128.3 (s, Ar), 129.4 (s, Ar), 129.5 (s, Ar), 136.7 (s, Ar), 142.3 (s, Ar), 144.0 (s, Ar), 165.6 (s, NCN). Anal. Calcd for C<sub>92</sub>H<sub>128</sub>N<sub>6</sub>Al<sub>2</sub>Y<sub>2</sub> (%): C, 71.30; H, 8.32; N, 5.42; Found: C, 71.64; H, 8.47; N, 5.54.

**[(PhCH<sub>2</sub>)<sub>2</sub>NC(NC<sub>6</sub>H<sub>3</sub><sup>i</sup>Pr<sub>2</sub>-2,6)]Y(μ<sub>3</sub>-η<sup>1</sup>:η<sup>1</sup>:η<sup>2</sup>-CH<sub>2</sub>CH<sub>2</sub>)[(μ<sub>2</sub>-η<sup>1</sup>-Et)(AlEt<sub>2</sub>)(μ<sub>2</sub>-η<sup>1</sup>-Et)<sub>2</sub>(AlEt)] (4-Y).** A frozen toluene solution (2 mL) of AlEt<sub>3</sub> (2.0 mL, 1 M in hexane, 2 mmol) was added slowly to a stirred frozen toluene solution (10 mL) of [(PhCH<sub>2</sub>)<sub>2</sub>NC(NC<sub>6</sub>H<sub>3</sub><sup>i</sup>Pr<sub>2</sub>-2,6)]Y(*o*-CH<sub>2</sub>C<sub>6</sub>H<sub>4</sub>NMe<sub>2</sub>)<sub>2</sub> (0.46 g, 0.5 mmol) at ambient temperature. The reaction mixture was allowed to stir at 50 °C for 24 h. The toluene was removed under vacuum, and the oily yellow residue turned to white powder

after washing twice with hexane (2 mL), which was collected by filtration and dried. Crystallization in toluene and stored at -35 °C to yield **4-Y** (0.36 g, 81%) as colorless crystals. <sup>1</sup>H NMR (400 MHz, C<sub>6</sub>D<sub>6</sub>, 25 °C): δ (ppm) = 0.30 (q, <sup>3</sup>J<sub>H-H</sub> = 8 Hz, 12H, [AlCH<sub>2</sub>CH<sub>3</sub>]<sup>-</sup>), 0.81 (br, 4H, μ<sub>3</sub>-CH<sub>2</sub>CH<sub>2</sub>), 1.08 (d, <sup>3</sup>J<sub>H-H</sub> = 8 Hz, 12H, CHMe<sub>2</sub>), 1.28 (t, <sup>3</sup>J<sub>H-H</sub> = 8 Hz, 30H, CHMe<sub>2</sub> and [AlCH<sub>2</sub>CH<sub>3</sub>]<sup>-</sup>), 3.68 (br, 4H, CHMe<sub>2</sub>), 3.97 (s, 4H, CH<sub>2</sub>Ph), 6.82 (br, 4H, Ar), 6.95-7.06 (m, 12H, Ar). <sup>13</sup>C{<sup>1</sup>H} NMR (100 MHz, C<sub>6</sub>D<sub>6</sub>, 25 °C): δ (ppm) = 7.0 (s, [AlCH<sub>2</sub>CH<sub>3</sub>]<sup>-</sup>), 11.1 (s, [AlCH<sub>2</sub>CH<sub>3</sub>]<sup>-</sup>), 13.3 (d, J<sub>Y-C</sub> = 7 Hz, μ<sub>3</sub>-CH<sub>2</sub>-CH<sub>2</sub>), 25.3 (s, CHMe<sub>2</sub>), 26.6 (s, CHMe<sub>2</sub>), 28.4 (s, CHMe<sub>2</sub>), 51.9 (s, CH<sub>2</sub>Ph), 125.1 (s, Ar), 125.3 (s, Ar), 127.9 (s, Ar), 128.1 (s, Ar), 128.4 (s, Ar), 129.0 (s, Ar), 129.8 (s, Ar), 136.1 (s, Ar), 142.7 (s, Ar), 142.8 (s, Ar), 166.4 (s, NCN). <sup>89</sup>Y NMR (24.5 MHz, C<sub>6</sub>D<sub>6</sub>, 25 °C): δ = 326.4 ppm. Anal. Calcd for C<sub>53</sub>H<sub>82</sub>N<sub>3</sub>Al<sub>2</sub>Y (%): C, 70.41; H, 9.14; N, 4.65; Found: C, 70.19; H, 9.20; N, 4.47.

**[(PhCH<sub>2</sub>)<sub>2</sub>NC(NC<sub>6</sub>H<sub>3</sub><sup>i</sup>Pr<sub>2</sub>-2,6)<sub>2</sub>]Y[(μ<sub>2</sub>-η<sup>1</sup>-Et)<sub>2</sub>(AlEt<sub>2</sub>)<sub>2</sub>] (5-Y)**. A toluene solution (2 mL) of AlEt<sub>3</sub> (2.0 mL, 1 M in hexane, 2.0 mmol) was added slowly to a stirred solution of [(PhCH<sub>2</sub>)<sub>2</sub>NC(NC<sub>6</sub>H<sub>3</sub><sup>i</sup>Pr<sub>2</sub>-2,6)<sub>2</sub>]Y(o-CH<sub>2</sub>C<sub>6</sub>H<sub>4</sub>NMe<sub>2</sub>)<sub>2</sub> (0.46 g, 0.5 mmol) in toluene (10 mL) at -10 °C. The reaction mixture was allowed to stir at -10 °C for 3 h. The toluene was removed under vacuum, and the oily yellow residue turned to white powder after washing twice with hexane (2 mL), which was collected by filtration and dried. Crystallization in toluene and stored at -35 °C to yield **5-Y** (0.43 g, 92%) as colorless crystals. <sup>1</sup>H NMR (400 MHz, C<sub>6</sub>D<sub>6</sub>, 25 °C): δ (ppm) = 0.53 (q, <sup>3</sup>J<sub>H-H</sub> = 8 Hz, 16H, [AlCH<sub>2</sub>CH<sub>3</sub>]<sup>-</sup>), 1.06 (d, <sup>3</sup>J<sub>H-H</sub> = 8 Hz, 12H, CHMe<sub>2</sub>), 1.37 (t, <sup>3</sup>J<sub>H-H</sub> = 8 Hz, 36H, CHMe<sub>2</sub> and [AlCH<sub>2</sub>CH<sub>3</sub>]<sup>-</sup>), 3.76 (m, 4H, CHMe<sub>2</sub>), 4.00 (s, 4H, CH<sub>2</sub>Ph), 6.78 (m, 4H, Ar), 6.80-7.05 (m, 12H, Ar). <sup>13</sup>C{<sup>1</sup>H} NMR (100 MHz, C<sub>6</sub>D<sub>6</sub>, 25 °C): δ (ppm) = 11.3 (s, [AlCH<sub>2</sub>CH<sub>3</sub>]<sup>-</sup>), 25.2 (s, CHMe<sub>2</sub>), 26.2 (s, CHMe<sub>2</sub>), 28.5 (s, CHMe<sub>2</sub>), 51.8 (s, CH<sub>2</sub>Ph), 125.0 (s, Ar), 125.4 (s, Ar), 127.8 (s, Ar), 128.1 (s, Ar), 128.3 (s, Ar), 128.5 (s, Ar), 129.4 (s, Ar), 135.8 (s, Ar), 142.7 (s, Ar), 142.8 (s, Ar), 165.3 (s, NCN). Anal. Calcd for C<sub>55</sub>H<sub>88</sub>N<sub>3</sub>YAl<sub>2</sub> (%): C, 70.71; H, 9.50; N, 4.50; Found: C, 71.01; H, 9.26; N, 4.37.

## NMR spectra of complexes 1-5.

The solid samples were dissolved in  $C_6D_6$ , and then transferred into a J-Young NMR tube in the glove-box. The  $^1H$ ,  $^{13}C\{^1H\}$ ,  $^{13}C$  DEPT-135 and HMQC-NMR spectra were recorded on a AVANCE III HD-400 NMR spectrometer (FT, 400 MHz for  $^1H$ ; 100 MHz for  $^{13}C$ ) in  $C_6D_6$  at room temperature. The  $^1H$  VT NMR spectra were recorded on a AVANCE III HD-500 NMR spectrometer (FT, 500 MHz for  $^1H$ ) in  $tol-d_8$ . And the  $^{89}Y$  NMR spectra recorded on a in  $C_6D_6$  at room temperature.  $^{89}Y$  NMR spectra were obtained on a AVANCE NEO-500 NMR spectrometer (FT, 24.5 MHz for  $^{89}Y$ ) and were externally referenced to  $YCl_3$  in  $D_2O$ .

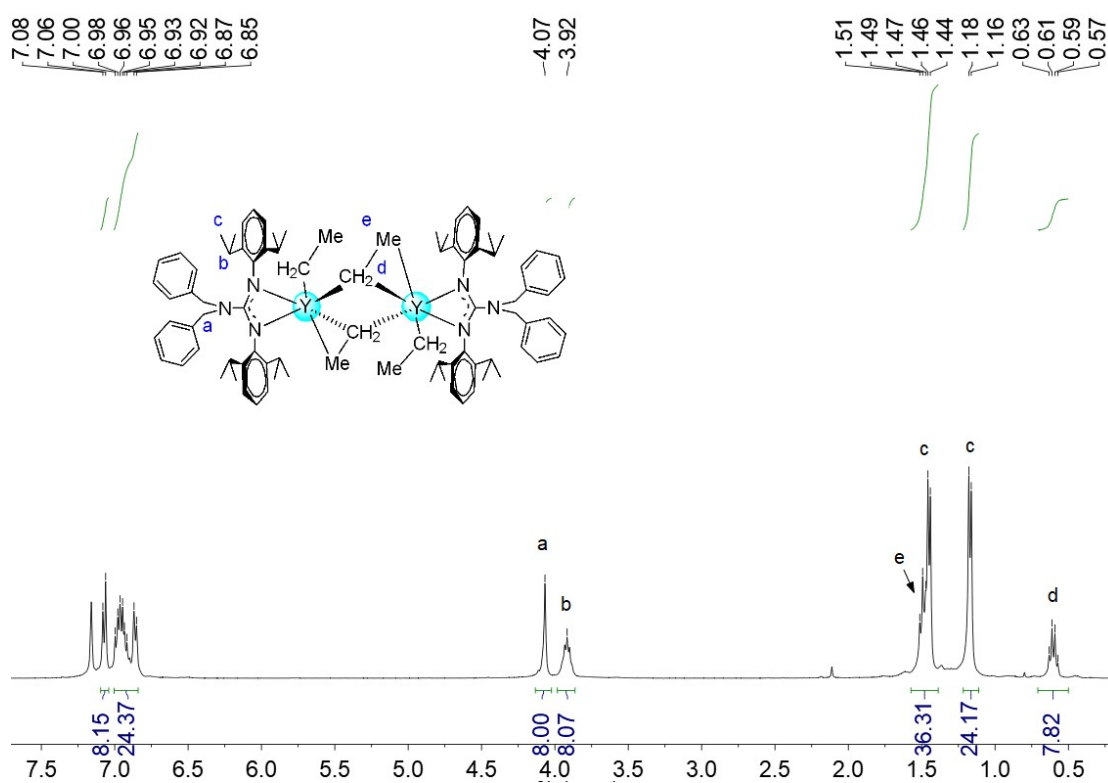

Figure S1.  $^1H$  NMR spectrum of 1-Y obtained in  $C_6D_6$  at room temperature.

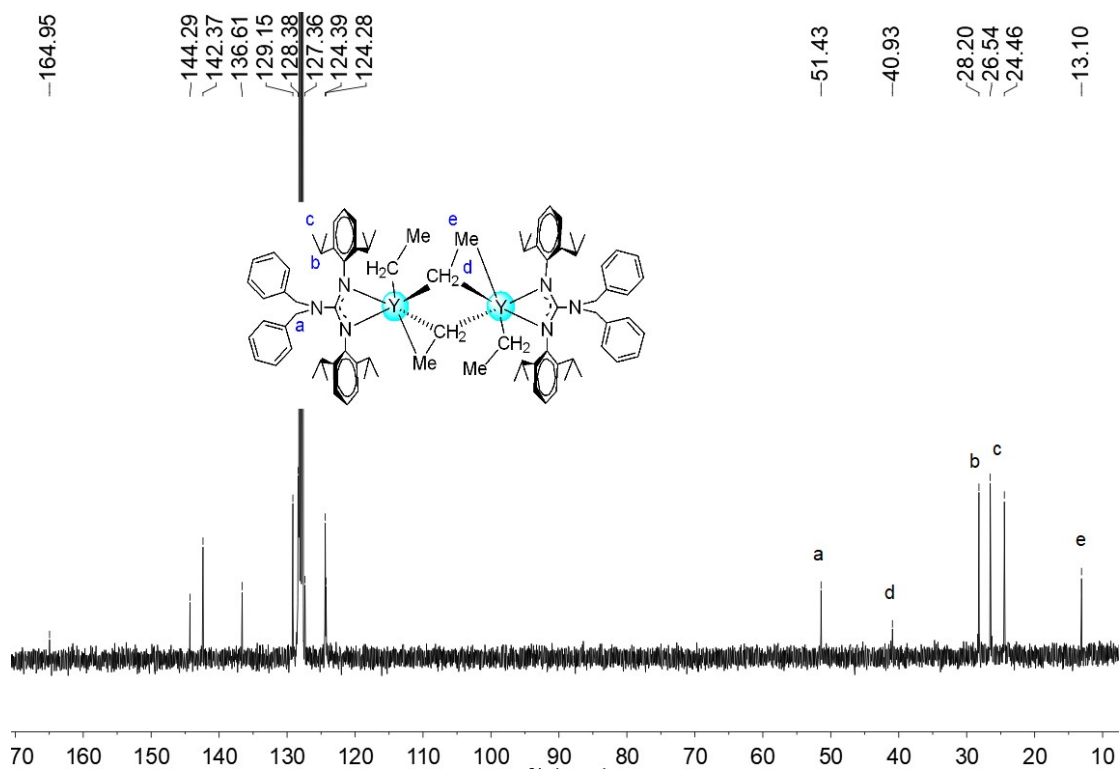

**Figure S2.** <sup>13</sup>C{<sup>1</sup>H} NMR spectrum of **1-Y** obtained in C<sub>6</sub>D<sub>6</sub> at room temperature.

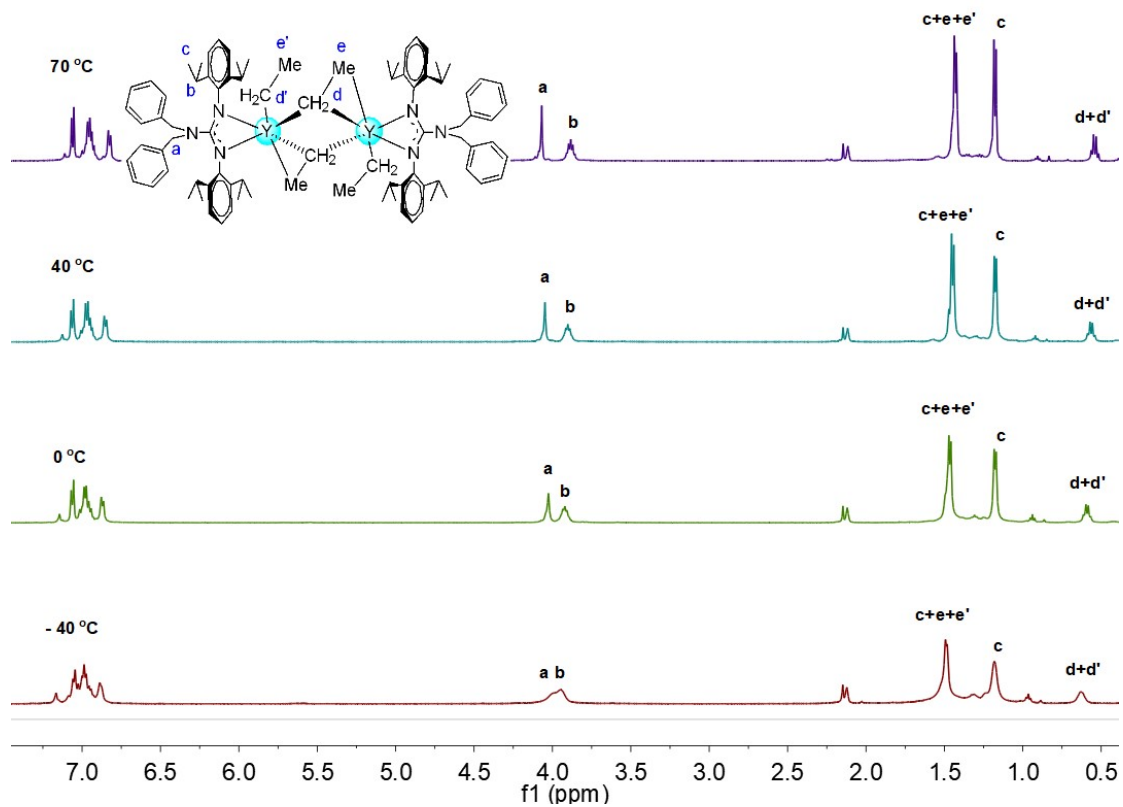

**Figure S3.** The <sup>1</sup>H VT NMR spectra (500 MHz) of **1-Y** in toluene-d<sub>8</sub>.

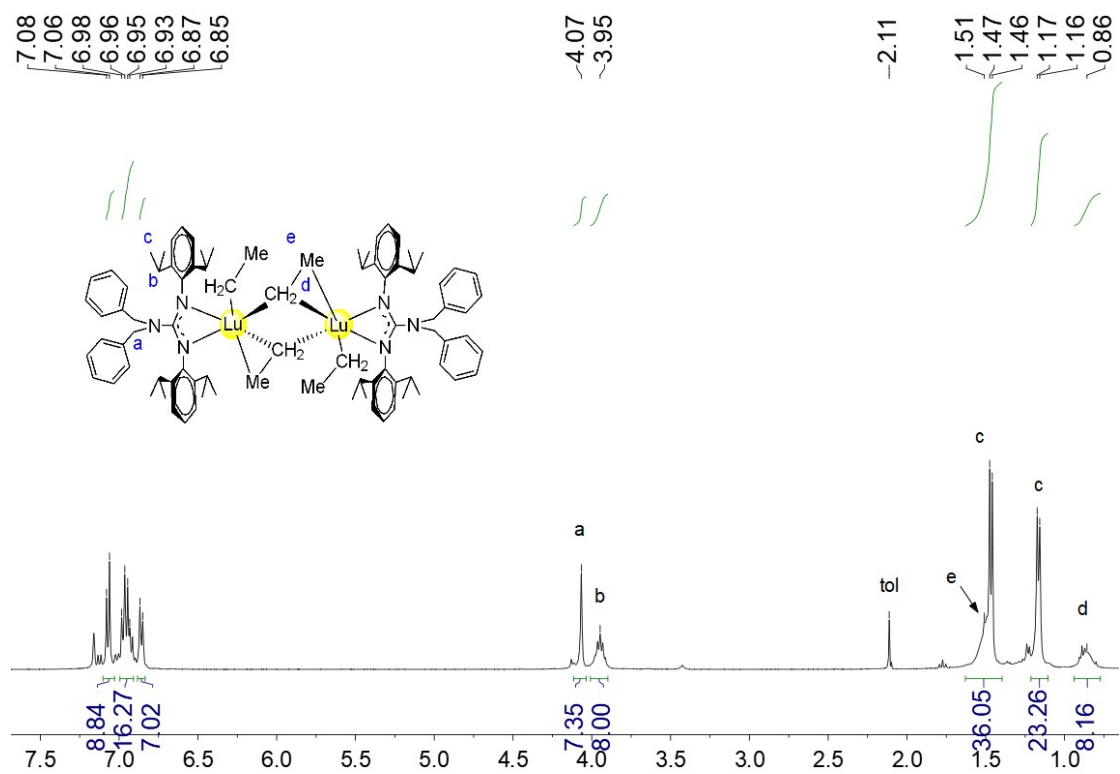

**Figure S4.** <sup>1</sup>H NMR spectrum of **1-Lu** obtained in C<sub>6</sub>D<sub>6</sub> at room temperature.

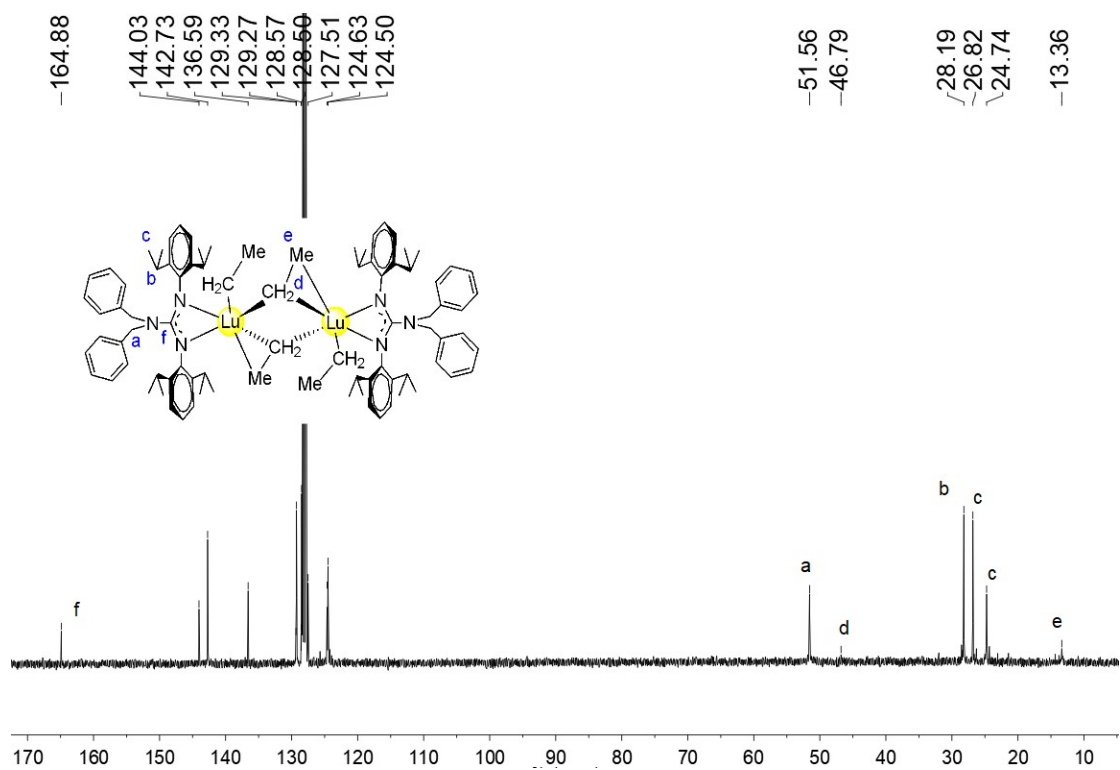

**Figure S5.** <sup>13</sup>C{<sup>1</sup>H} NMR spectrum of **1-Lu** obtained in C<sub>6</sub>D<sub>6</sub> at room temperature.



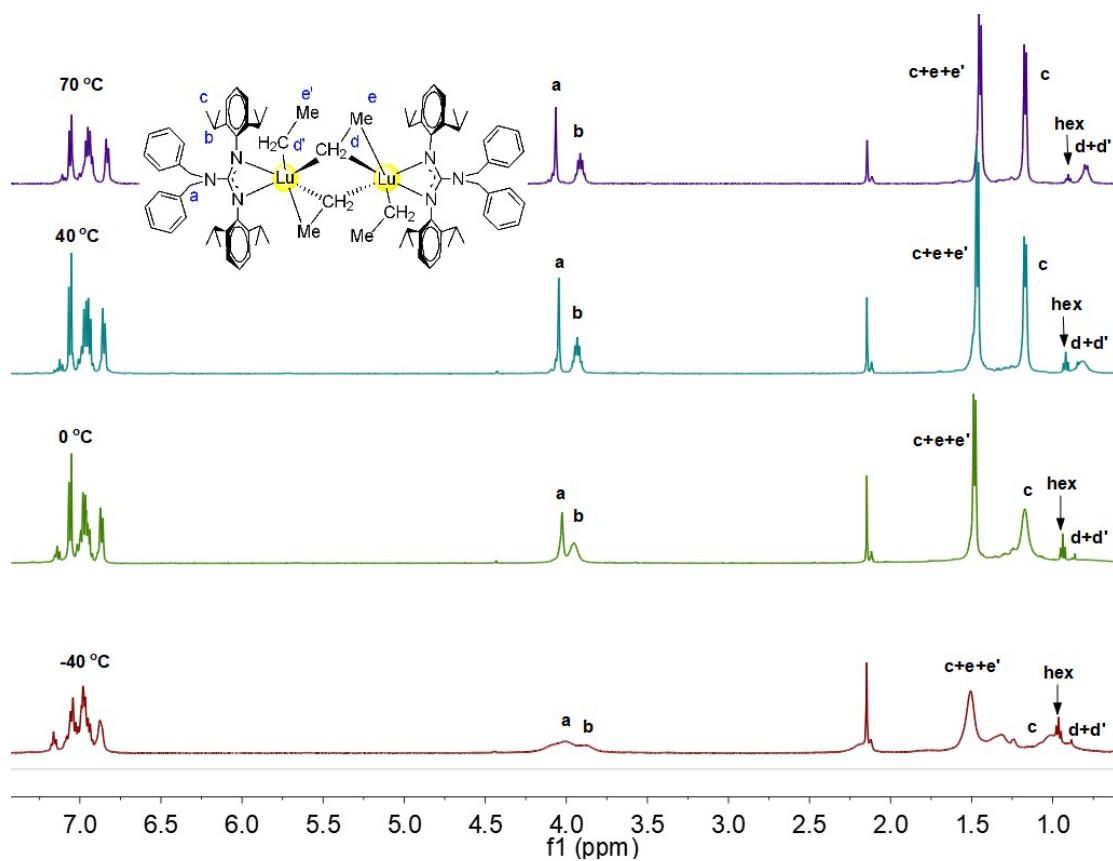

Figure S6. The  $^1\text{H}$  VT NMR spectra (500 MHz) of **1-Lu** in  $\text{toluene-d}_8$ .

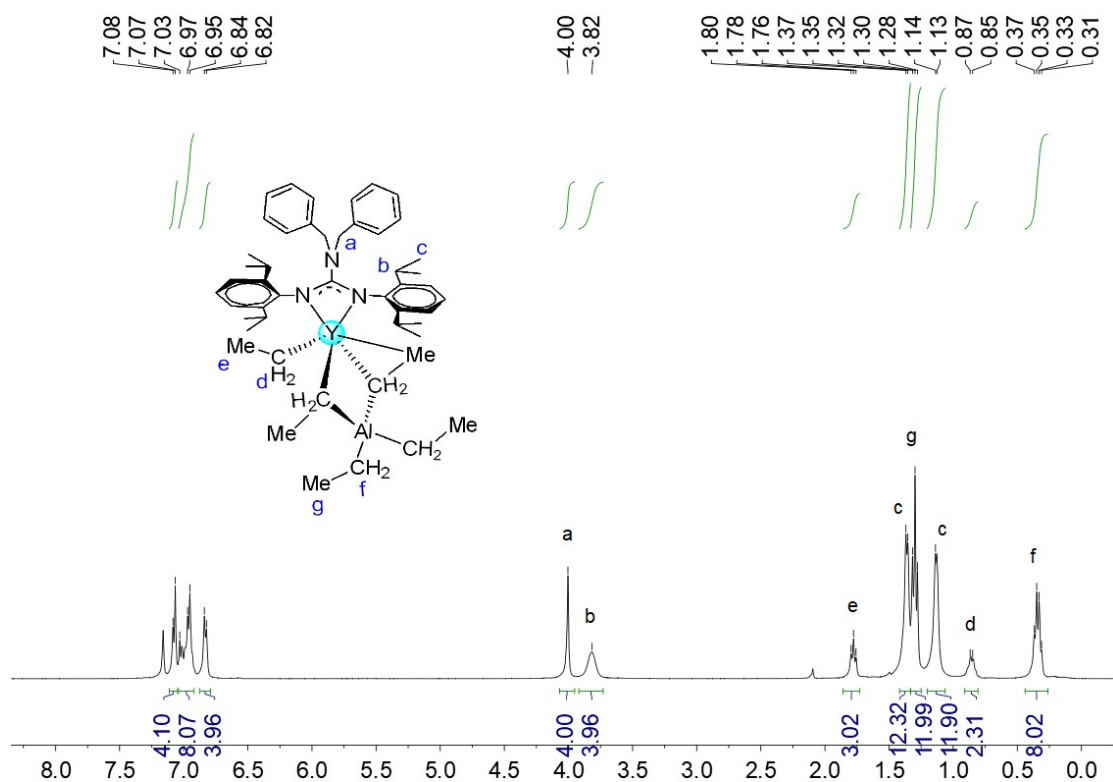

Figure S7.  $^1\text{H}$  NMR spectrum of **2-Y** obtained in  $\text{C}_6\text{D}_6$  at room temperature.

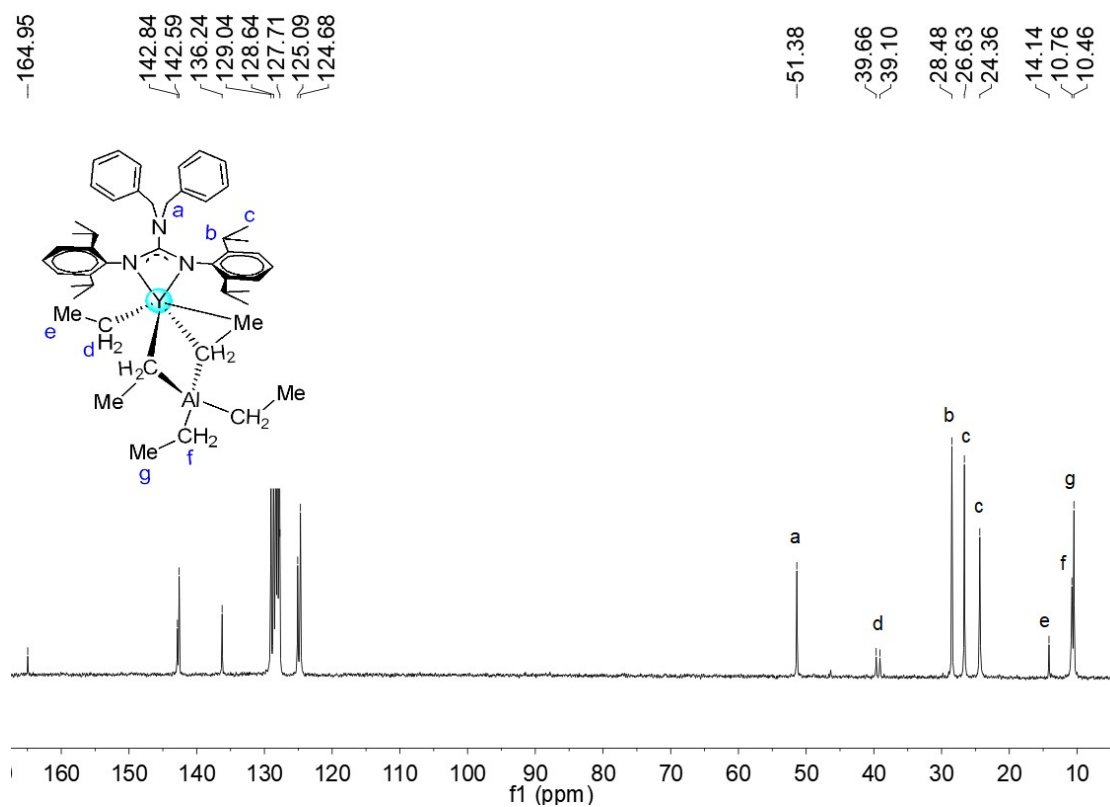

**Figure S8.**  $^{13}\text{C}\{^1\text{H}\}$  NMR spectrum of **2-Y** obtained in  $\text{C}_6\text{D}_6$  at room temperature.

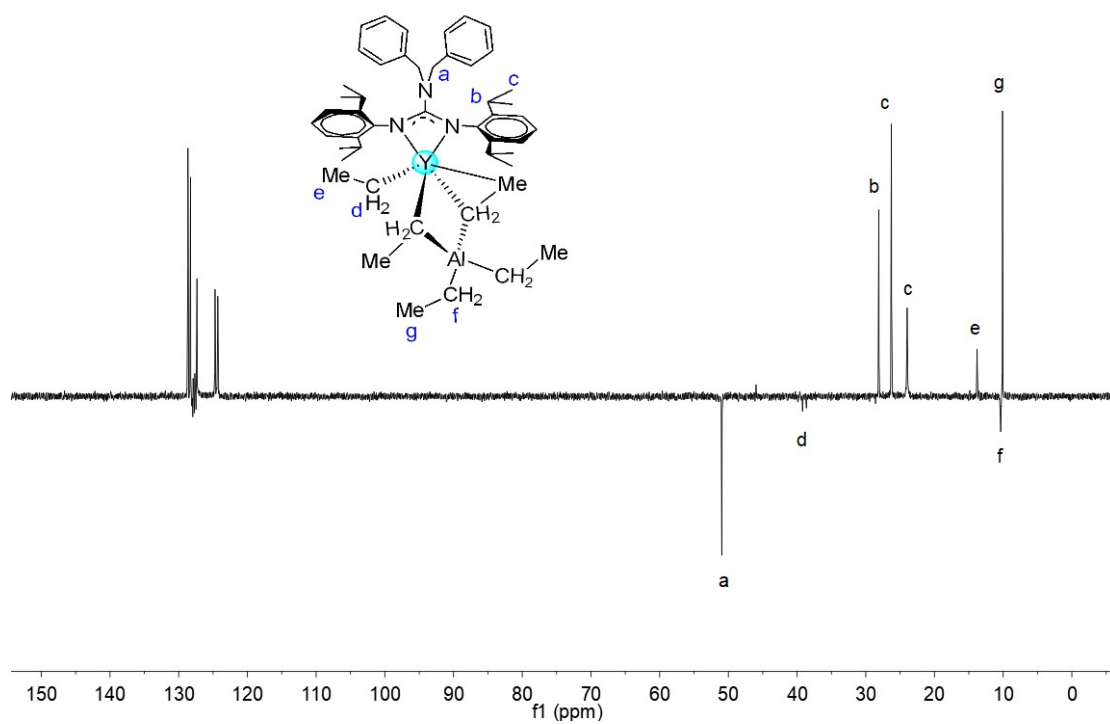

**Figure S9.**  $^{13}\text{C}$  DEPT-135 NMR spectrum of **2-Y** obtained in  $\text{C}_6\text{D}_6$  at room temperature.

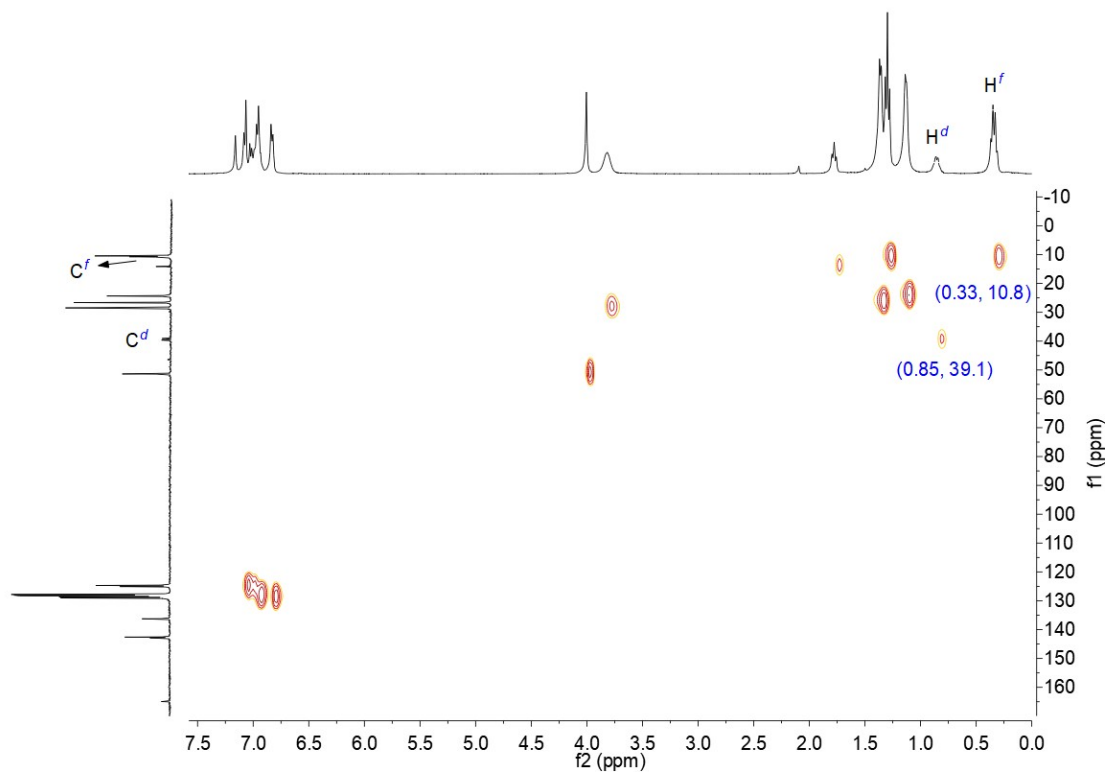

**Figure S10.** Two-dimensional  $^1\text{H}$ - $^{13}\text{C}$  HMQC NMR spectrum of **2-Y** in  $\text{C}_6\text{D}_6$  at room temperature.

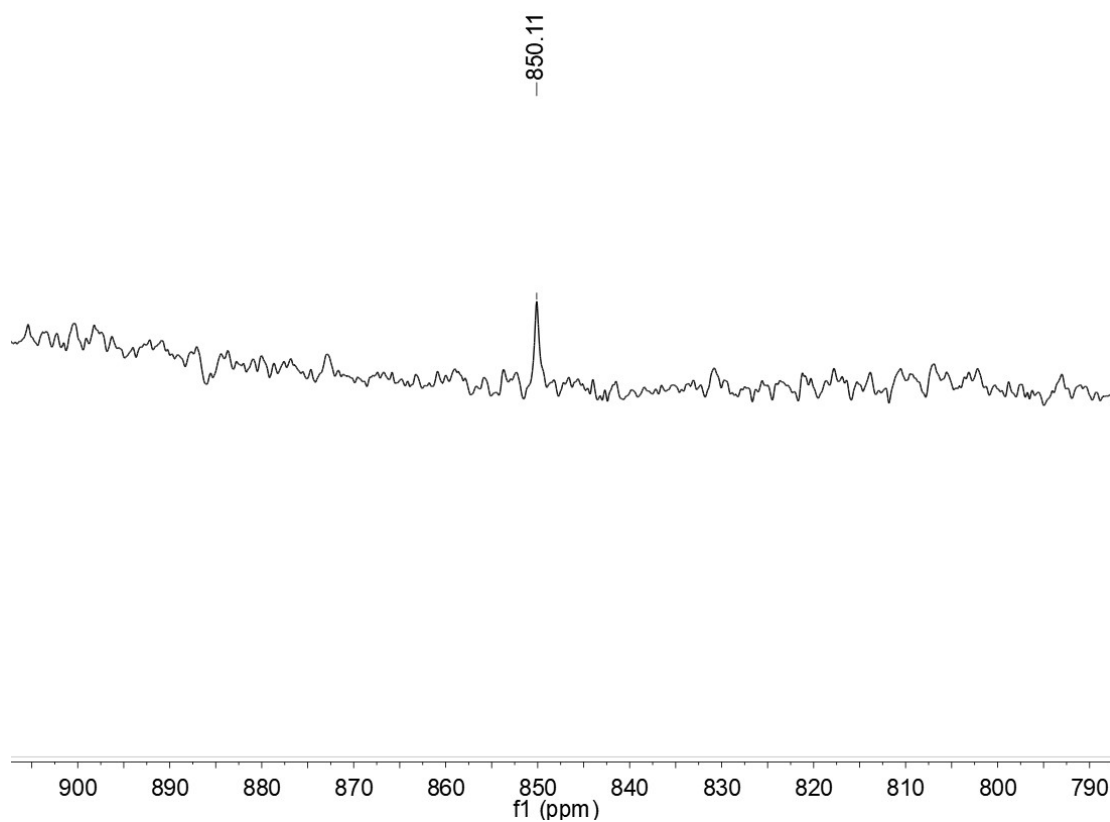

**Figure S11.** The  $^{89}\text{Y}$  NMR spectrum (24.5 MHz) of **2-Y** in  $\text{C}_6\text{D}_6$  at room temperature.

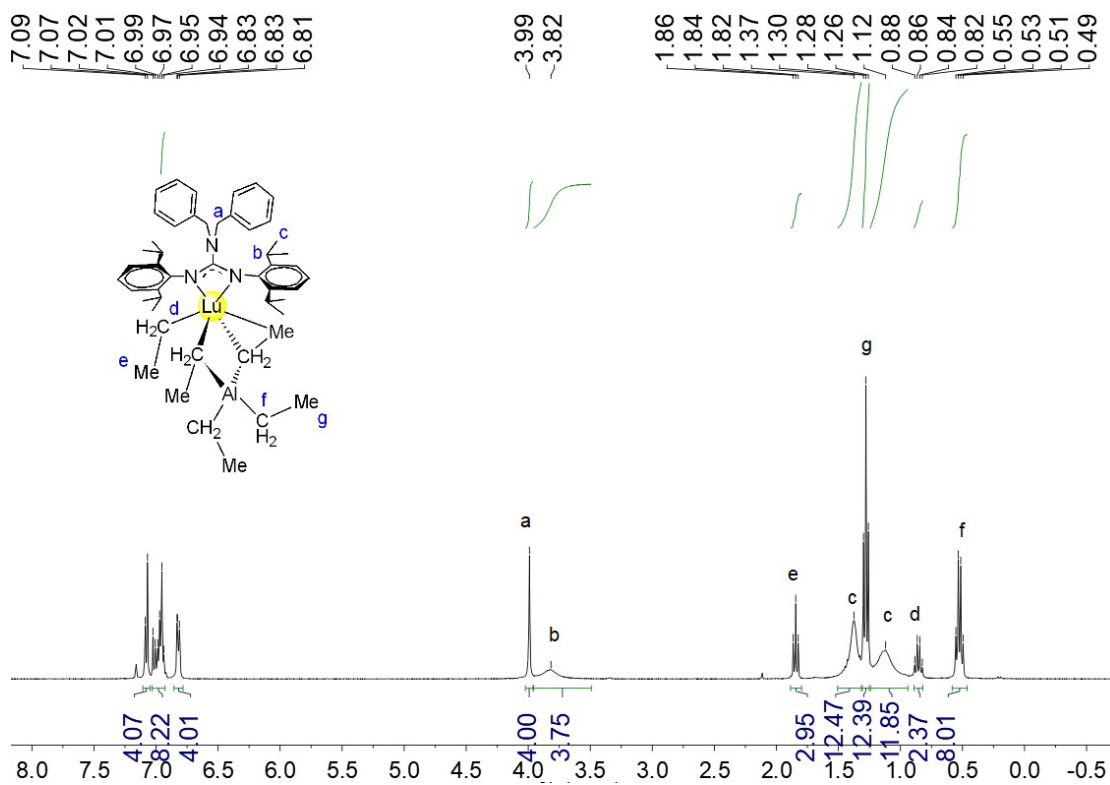

**Figure S12.** <sup>1</sup>H NMR spectrum of **2-Lu** obtained in C<sub>6</sub>D<sub>6</sub> at room temperature.

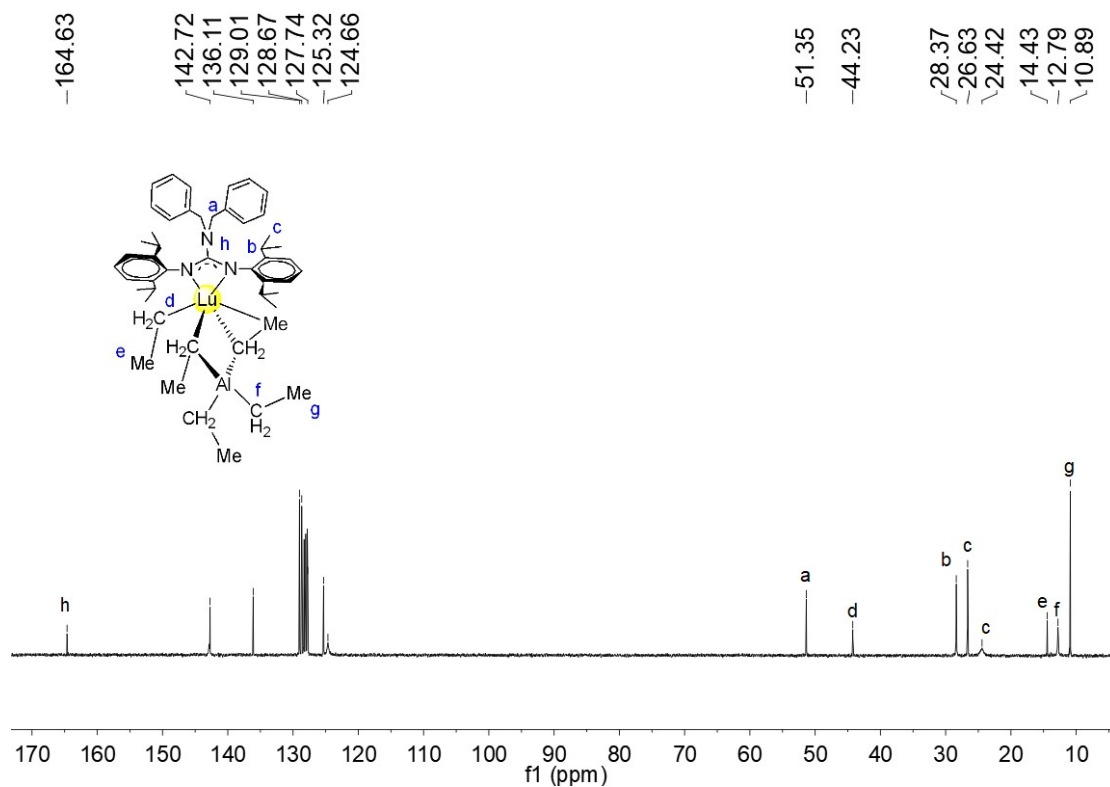

**Figure S13.** <sup>13</sup>C{<sup>1</sup>H} NMR spectrum of **2-Lu** obtained in C<sub>6</sub>D<sub>6</sub> at room temperature.

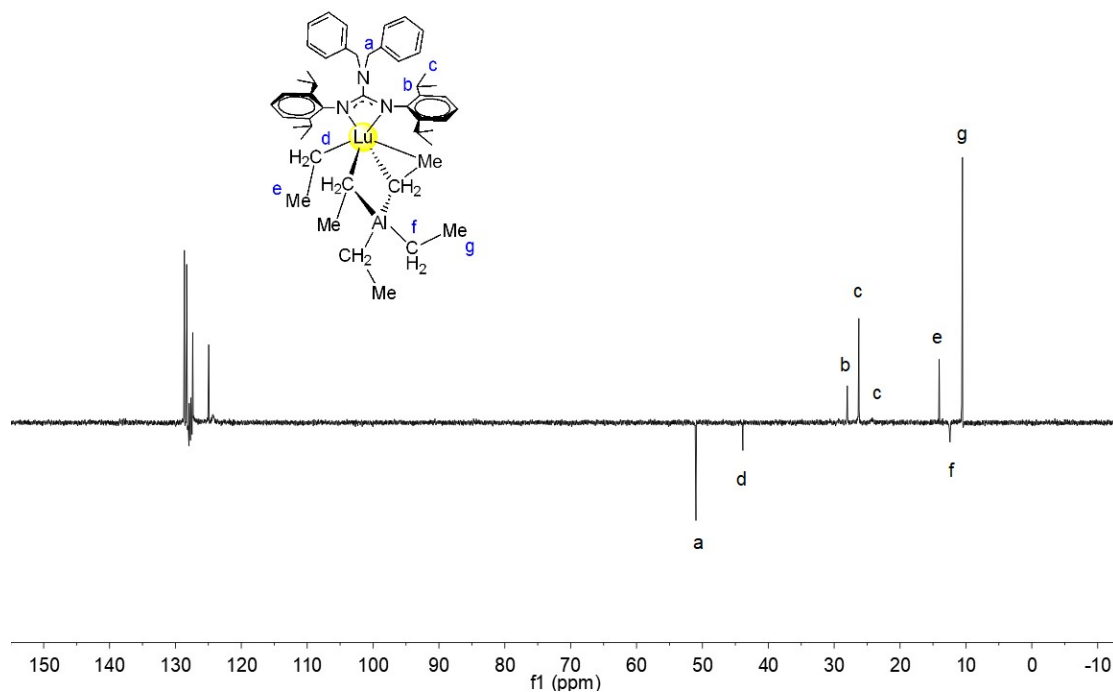

**Figure S14.**  $^{13}\text{C}$  DEPT-135 NMR spectrum of **2-Lu** obtained in  $\text{C}_6\text{D}_6$  at room temperature.

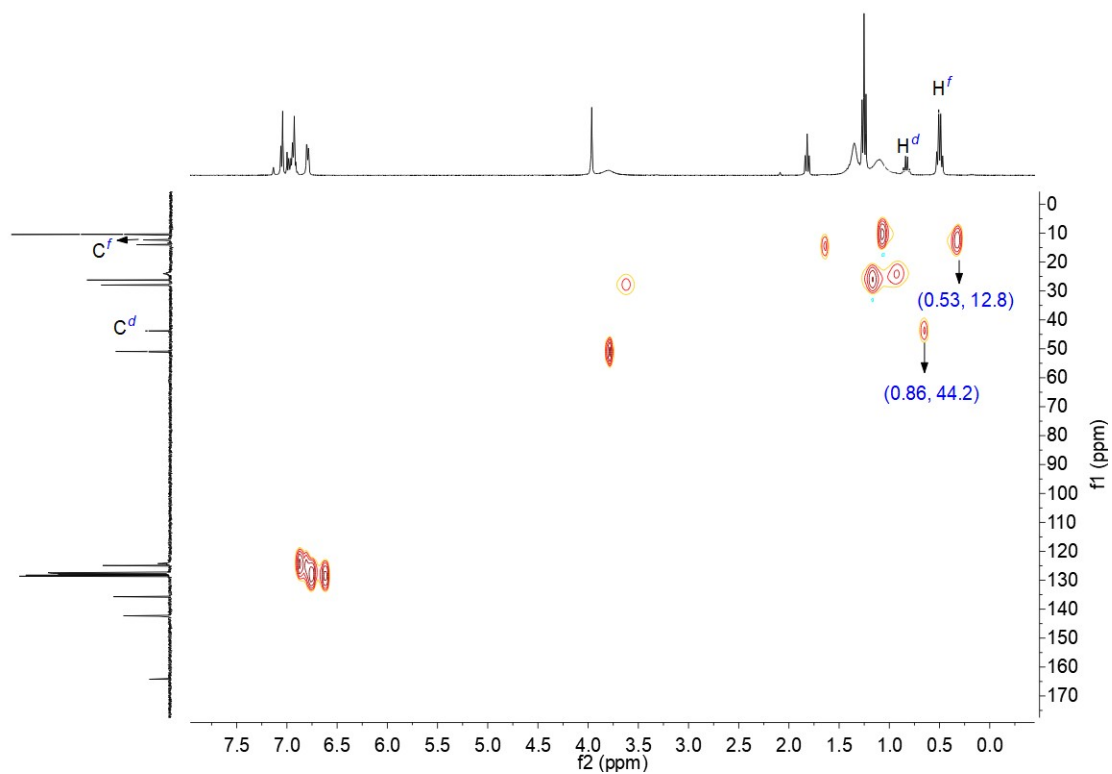

**Figure S15.** Two-dimensional  $^1\text{H}$ - $^{13}\text{C}$  HMQC NMR spectrum of **2-Lu** in  $\text{C}_6\text{D}_6$  at room temperature.

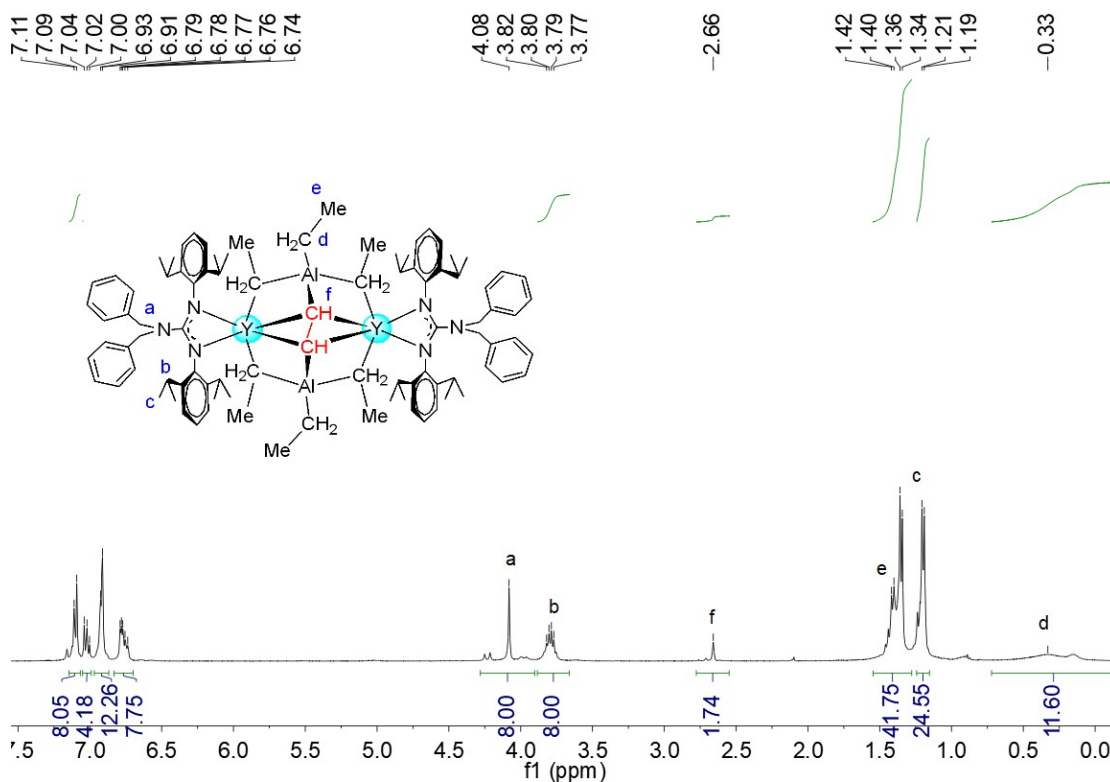

**Figure S16.** <sup>1</sup>H NMR spectrum of **3-Y** obtained in C<sub>6</sub>D<sub>6</sub> at room temperature.

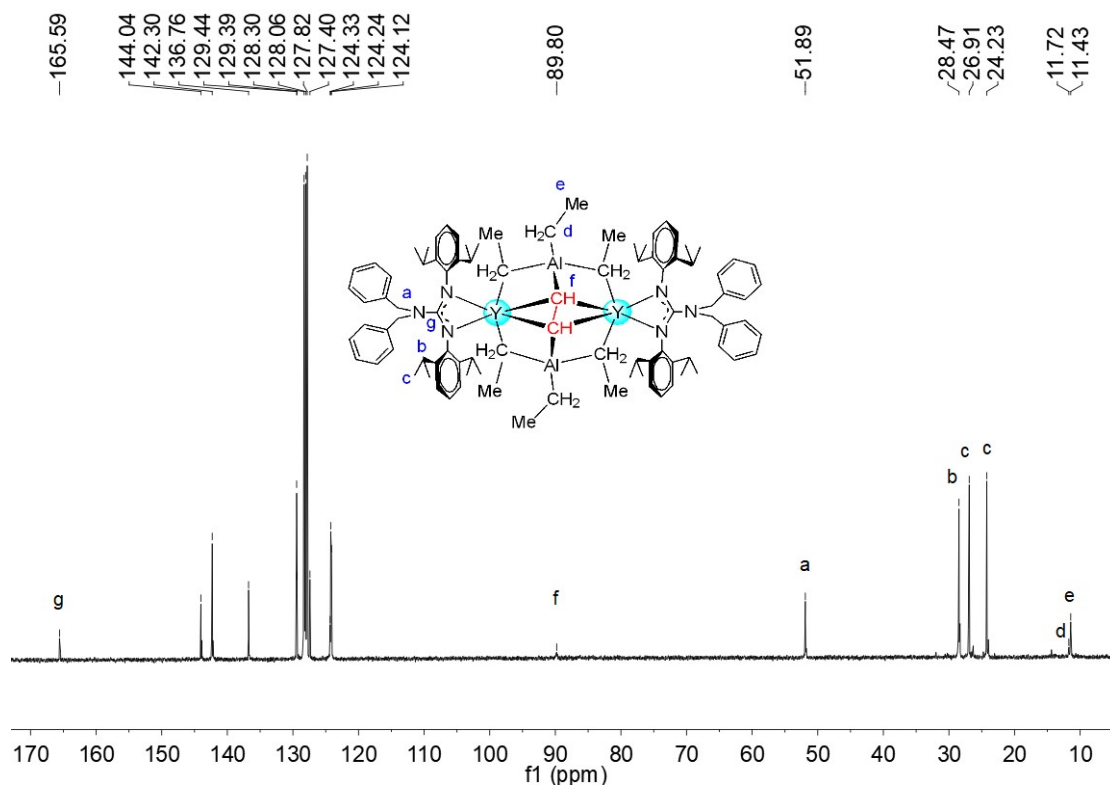

**Figure S17.** <sup>13</sup>C{<sup>1</sup>H} NMR spectrum of **3-Y** obtained in C<sub>6</sub>D<sub>6</sub> at room temperature.

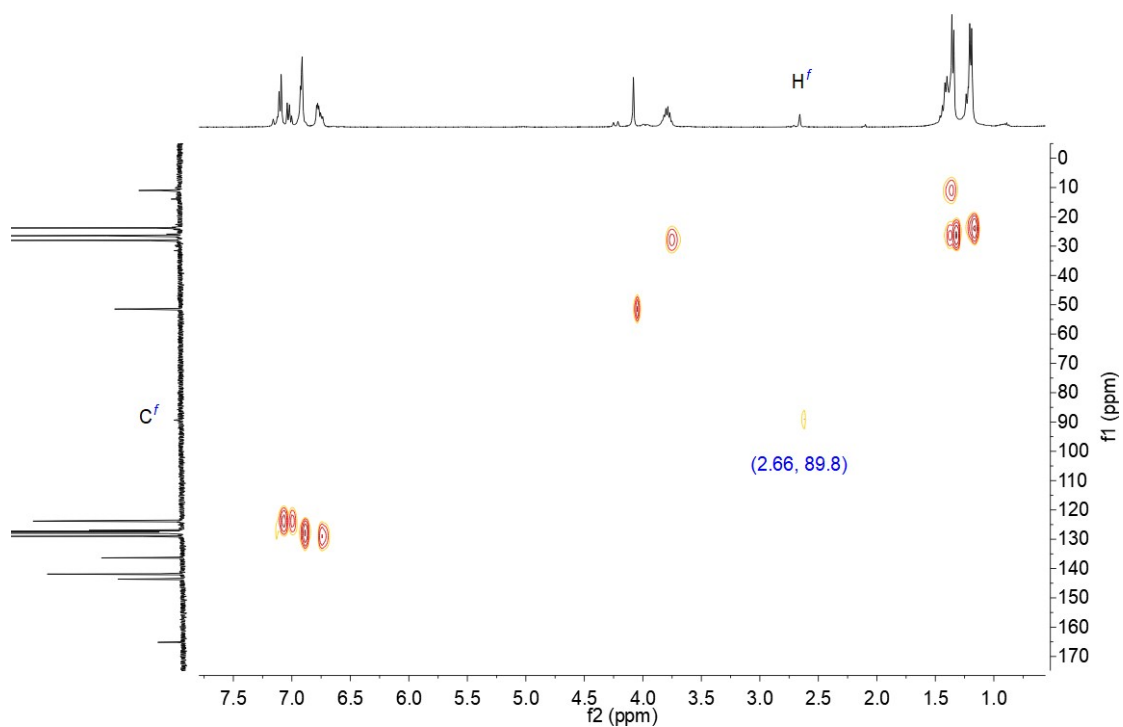

**Figure S18.** Two-dimensional  $^1\text{H}$ - $^{13}\text{C}$  HMQC NMR spectrum of complex **3-Y** in  $\text{C}_6\text{D}_6$  at room temperature.

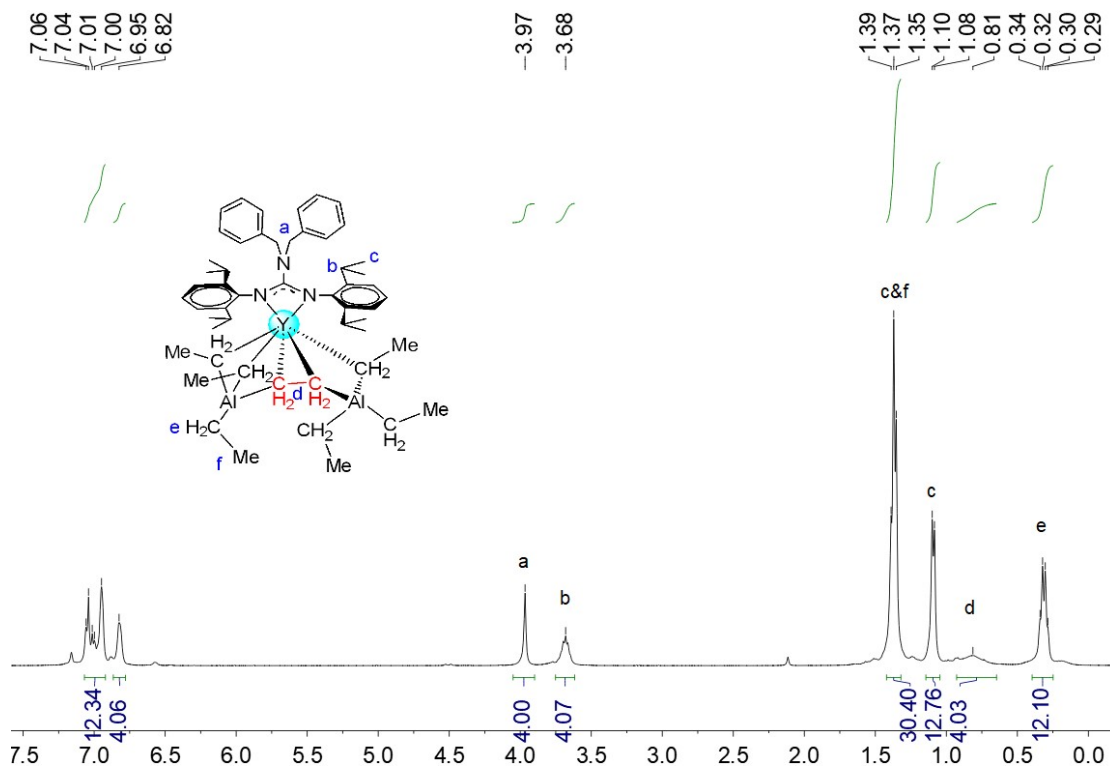

**Figure S19.**  $^1\text{H}$  NMR spectrum of **4-Y** obtained in  $\text{C}_6\text{D}_6$  at room temperature.

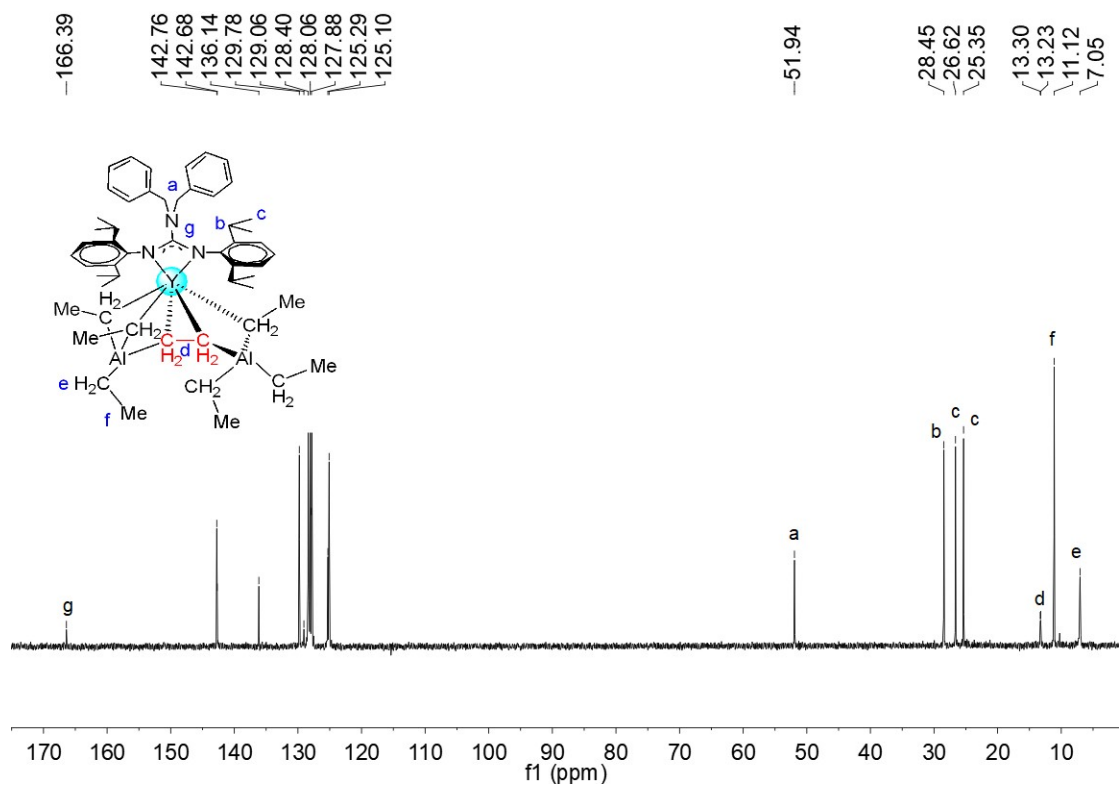

**Figure S20.**  $^{13}\text{C}\{^1\text{H}\}$  NMR spectrum of **4-Y** obtained in  $\text{C}_6\text{D}_6$  at room temperature.

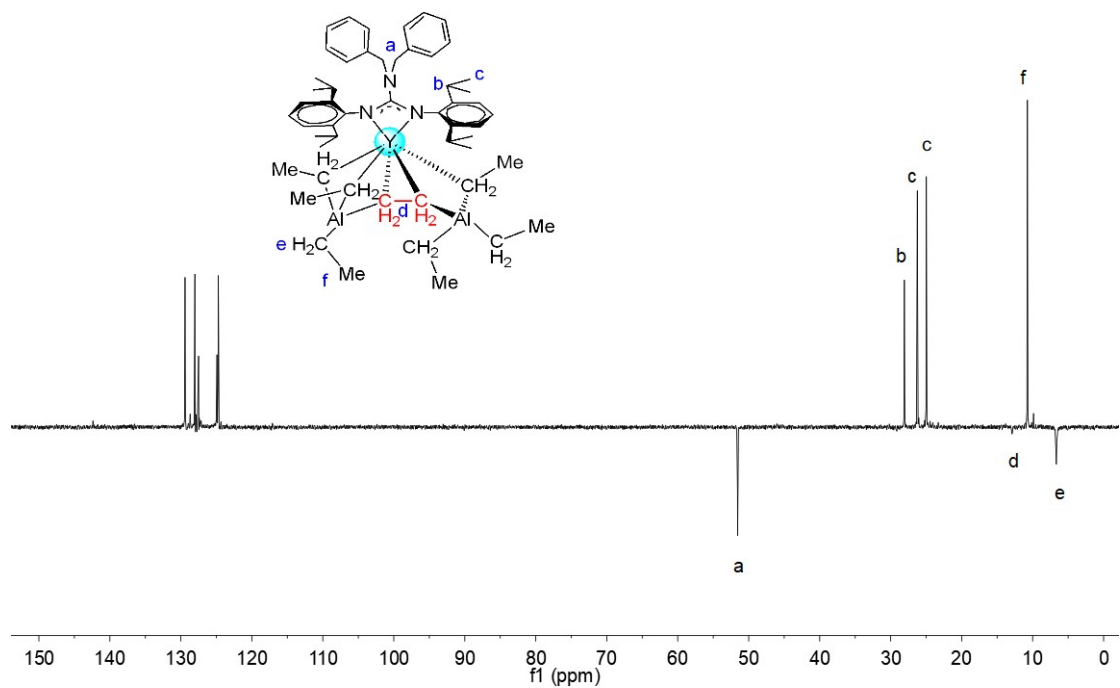

**Figure S21.**  $^{13}\text{C}$  DEPT-135 NMR spectrum of **4-Y** obtained in  $\text{C}_6\text{D}_6$  at room temperature.



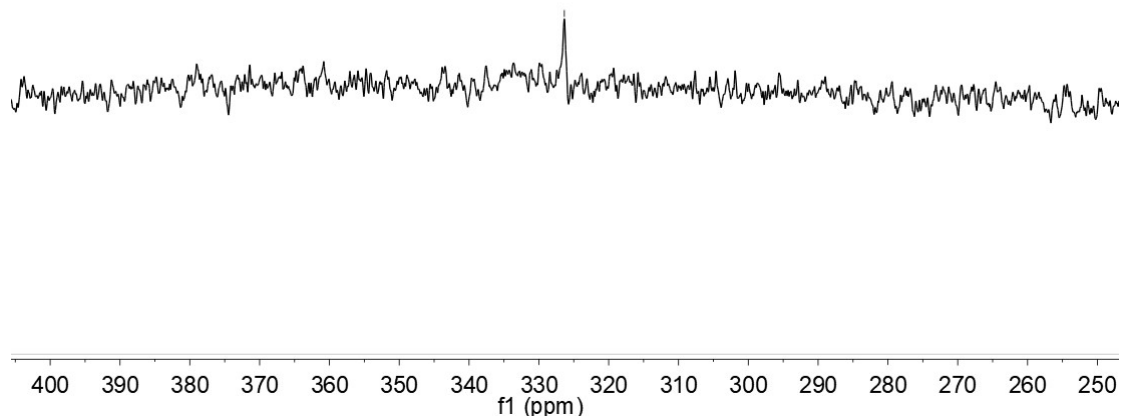

**Figure S22.** The  $^{89}\text{Y}$  NMR spectrum (24.5 MHz) of **4-Y** in  $\text{C}_6\text{D}_6$  at room temperature.

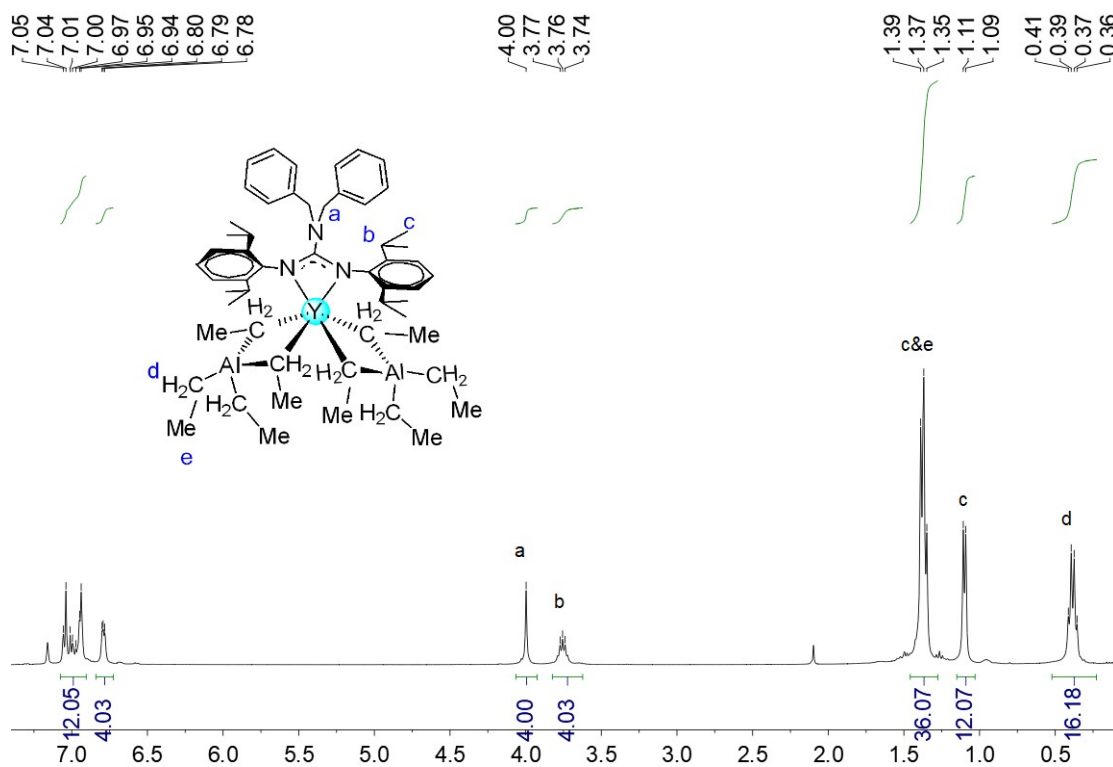

**Figure S23.**  $^1\text{H}$  NMR spectrum of **5-Y** obtained in  $\text{C}_6\text{D}_6$  at room temperature.

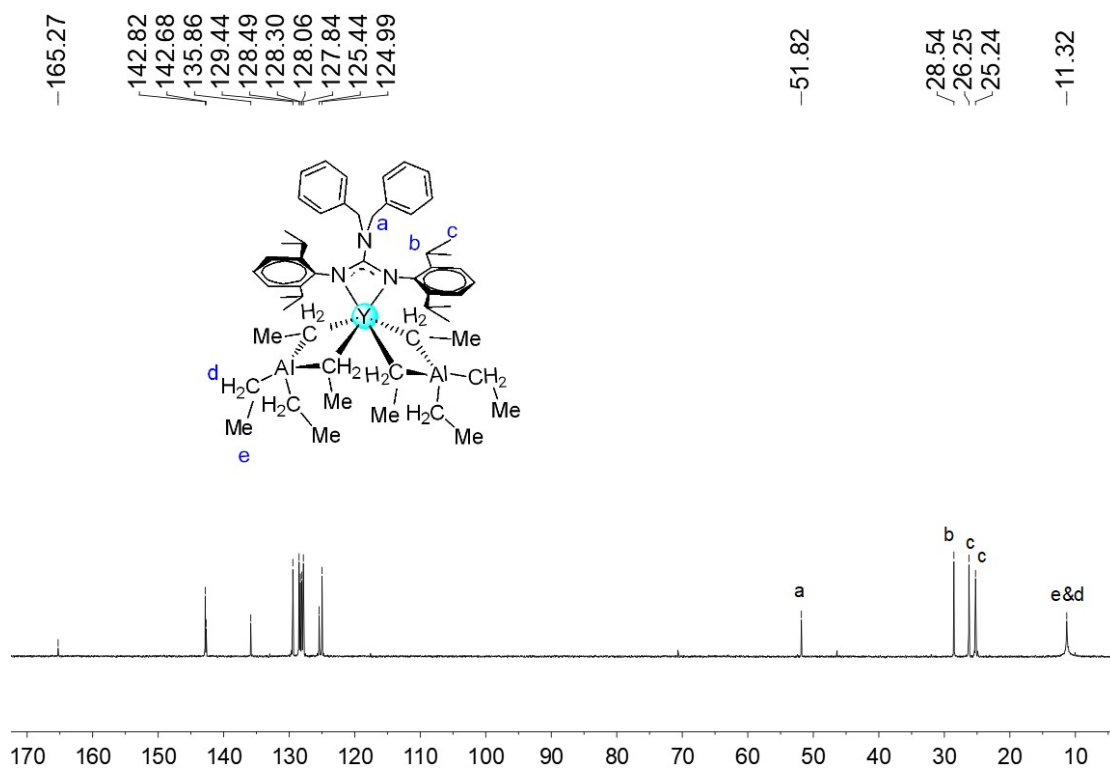

**Figure S24.**  $^{13}\text{C}\{^1\text{H}\}$  NMR spectrum of **5-Y** obtained in  $\text{C}_6\text{D}_6$  at room temperature.

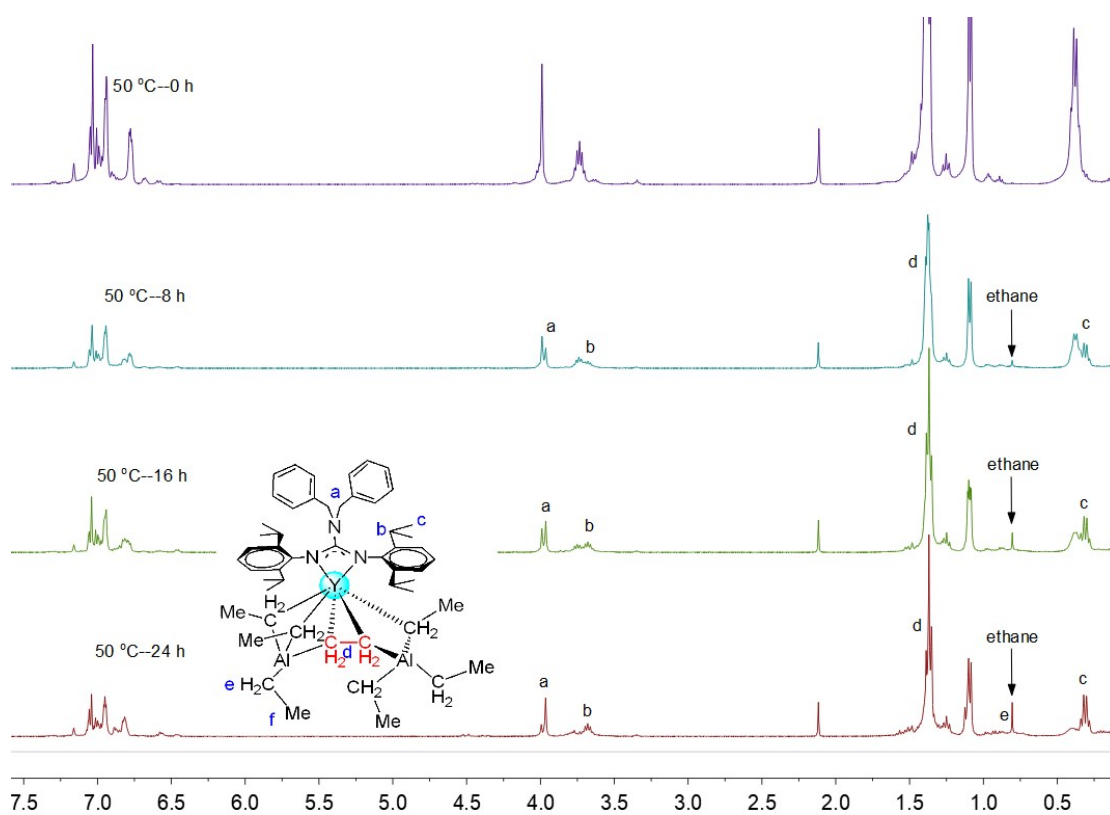

**Figure S25.** The *in situ*  $^1\text{H}$  NMR spectrum was carried out on conversion of **4-Y** from **5-Y** in  $\text{C}_6\text{D}_6$  at room temperature.

## X-ray Crystallographic structure determinations

All crystals for X-ray analysis were obtained as described in the preparations. In the glovebox, the suitable crystals were sealed in dried immersion oil. Data collections were performed on a Bruker SMART APEX or Bruker SMART APEX II (at 173 K or 298 K) diffractometer with CCD area detector using graphite-monochromated Mo/Ga K $\alpha$  radiation ( $\lambda = 0.71073 \text{ \AA}$  /  $\lambda = 1.34138 \text{ \AA}$ ). The determination of crystal class and unit cell was carried out by using the SMART program package. The raw frame data were processed using SAINT<sup>[1]</sup> and SADABS<sup>[2]</sup> to yield the reflection data file. The structure was solved by using the SHELXTL program<sup>[3]</sup> Refinement was performed on  $F^2$  anisotropically by the full-matrix least-squares method for all the non-hydrogen atoms. The analytical scattering factors for neutral atoms were used throughout the analysis. Except for the hydrogen atoms on bridging carbons, hydrogen atoms were placed at the calculated positions and included in the structure calculation without further refinement of the parameters. The hydrogen atoms on bridging carbons were located by difference Fourier syntheses and their coordinates and isotropic parameters were refined. The residual electron densities were of no chemical significance. Crystal data, data collection, and processing parameters: 2259604 (for **1-Lu**), 2259606 (for **2-Y**), 2259605 (for **2-Lu**), 2259607 (for **3-Y**), 2259608 (for **4-Y**) and 2259609 (for **5-Y**) contain the supplementary crystallographic data for this paper. These data can be obtained free of charge from The Cambridge Crystallographic Data Centre via <https://www.ccdc.cam.ac.uk/Community/Depositastructure/CSDCommunications/>

## Crystal data of selected complexes

**Table S1.** Crystal data and refinement details of complexes **1-Lu**, **2-Y** and **2-Lu**.

|                                                                                                                | <b>1-Lu</b>                                                     | <b>2-Y</b>                                         | <b>2-Lu</b>                                         |
|----------------------------------------------------------------------------------------------------------------|-----------------------------------------------------------------|----------------------------------------------------|-----------------------------------------------------|
| Formula                                                                                                        | C <sub>86</sub> H <sub>116</sub> N <sub>6</sub> Lu <sub>2</sub> | C <sub>49</sub> H <sub>73</sub> N <sub>3</sub> AlY | C <sub>49</sub> H <sub>73</sub> N <sub>3</sub> AlLu |
| Molecular weight                                                                                               | 1583.84                                                         | 820.03                                             | 906.09                                              |
| Crystal system                                                                                                 | Triclinic                                                       | Monoclinic                                         | Monoclinic                                          |
| Space group                                                                                                    | P-1                                                             | P2 <sub>1</sub> /c                                 | P2 <sub>1</sub> /c                                  |
| <i>a</i> / (Å)                                                                                                 | 10.8568(4)                                                      | 11.4571(12)                                        | 11.4749(4)                                          |
| <i>b</i> / (Å)                                                                                                 | 19.2449(8)                                                      | 19.681(3)                                          | 19.6122(7)                                          |
| <i>c</i> / (Å)                                                                                                 | 21.6617(7)                                                      | 21.041(3)                                          | 20.9790(9)                                          |
| <i>V</i> / (Å <sup>3</sup> )                                                                                   | 4417.0(3)                                                       | 4679.6(10)                                         | 4662.0(3)                                           |
| <i>Z</i>                                                                                                       | 2                                                               | 4                                                  | 4                                                   |
| $\rho_c$ / (mg. m <sup>-3</sup> )                                                                              | 1.260                                                           | 1.154                                              | 1.291                                               |
| $\mu$ (Mo-K $\alpha$ )/(mm <sup>-1</sup> )                                                                     | 2.267                                                           | 1.299                                              | 2.170                                               |
| Limiting indices                                                                                               | -13<= <i>h</i> <=13                                             | -13<= <i>h</i> <=13                                | -14<= <i>h</i> <=14                                 |
|                                                                                                                | -24<= <i>k</i> <=24                                             | -23<= <i>k</i> <=23                                | -24<= <i>k</i> <=24                                 |
|                                                                                                                | -27<= <i>l</i> <=27                                             | -25<= <i>l</i> <=25                                | -26<= <i>l</i> <=26                                 |
| Collected reflections                                                                                          | 307106                                                          | 92292                                              | 111964                                              |
| Unique                                                                                                         | 18302 [R(int) = 0.1023]                                         | 8690 [R(int) = 0.1745]                             | 9667 [R(int) = 0.1165]                              |
| Parameters                                                                                                     | 968                                                             | 547                                                | 528                                                 |
| Goodness of fit on <i>F</i> <sup>2</sup>                                                                       | 1.022                                                           | 1.028                                              | 1.010                                               |
| <i>R</i> <sub>1</sub> <sup>a</sup> , <i>wR</i> <sub>2</sub> <sup>a</sup> [ <i>I</i> > 2 $\sigma$ ( <i>I</i> )] | <i>R</i> <sub>1</sub> = 0.0311                                  | <i>R</i> <sub>1</sub> = 0.0412                     | <i>R</i> <sub>1</sub> = 0.0277                      |
|                                                                                                                | <i>wR</i> <sub>2</sub> = 0.0670                                 | <i>wR</i> <sub>2</sub> = 0.0974                    | <i>wR</i> <sub>2</sub> = 0.0602                     |
| <i>R</i> <sub>1</sub> , <i>wR</i> <sub>2</sub> indices (all data)                                              | <i>R</i> <sub>1</sub> = 0.0470                                  | <i>R</i> <sub>1</sub> = 0.0748                     | <i>R</i> <sub>1</sub> = 0.0441                      |
|                                                                                                                | <i>wR</i> <sub>2</sub> = 0.0726                                 | <i>wR</i> <sub>2</sub> = 0.1101                    | <i>wR</i> <sub>2</sub> = 0.0661                     |
| Max/min residual density (e Å <sup>-3</sup> )                                                                  | 1.11 and -0.91                                                  | 0.87 and -0.45                                     | 0.59 and -0.52                                      |

<sup>a</sup>  $R_1 = \sum || F_0 | - | F_c ||$  (based on reflections with  $F_o^2 > 2\sigma F^2$ ).  $wR_2 = [\sum [w(F_o^2 - F_c^2)^2] / \sum [w(F_o^2)^2]]^{1/2}$ ;  $w = 1/[\sigma^2(F_o^2) + (0.095P)^2]$ ;  $P = [\max(F_o^2, 0) + 2F_c^2] / 3$  (also with  $F_o^2 > 2\sigma F^2$ ).

**Table S2.** Crystal data and refinement details of complexes **3-Y**, **4-Y** and **5-Y**.

|                                                                                                       | <b>3-Y</b>                                                                     | <b>4-Y</b>                                                        | <b>5-Y</b>                                                        |
|-------------------------------------------------------------------------------------------------------|--------------------------------------------------------------------------------|-------------------------------------------------------------------|-------------------------------------------------------------------|
| Formula                                                                                               | C <sub>92</sub> H <sub>128</sub> N <sub>6</sub> Al <sub>2</sub> Y <sub>2</sub> | C <sub>53</sub> H <sub>82</sub> N <sub>3</sub> Al <sub>2</sub> Y  | C <sub>55</sub> H <sub>88</sub> N <sub>3</sub> YAl <sub>2</sub>   |
| Molecular weight                                                                                      | 1549.84                                                                        | 904.12                                                            | 934.19                                                            |
| Crystal system                                                                                        | Triclinic                                                                      | Monoclinic                                                        | Monoclinic                                                        |
| Space group                                                                                           | P-1                                                                            | P2 <sub>1</sub>                                                   | P2 <sub>1</sub> /c                                                |
| <i>a</i> / (Å)                                                                                        | 13.5651(5)                                                                     | 21.3577(8)                                                        | 21.5841(6)                                                        |
| <i>b</i> / (Å)                                                                                        | 18.5143(7)                                                                     | 11.1948(4)                                                        | 30.8815(9)                                                        |
| <i>c</i> / (Å)                                                                                        | 19.5102(7)                                                                     | 21.4820(9)                                                        | 16.1320(5)                                                        |
| <i>V</i> / (Å <sup>3</sup> )                                                                          | 4240.7(3)                                                                      | 5136.2(3)                                                         | 10725.0(5)                                                        |
| <i>Z</i>                                                                                              | 2                                                                              | 2                                                                 | 4                                                                 |
| $\rho_c$ / (mg. m <sup>-3</sup> )                                                                     | 1.214                                                                          | 1.167                                                             | 1.157                                                             |
| $\mu$ (Mo-K $\alpha$ )/(mm <sup>-1</sup> )                                                            | 1.583                                                                          | 1.460                                                             | 1.400                                                             |
| Limiting indices                                                                                      | -17<= <i>h</i> <=17<br>-23<= <i>k</i> <=23<br>-24<= <i>l</i> <=24              | -27<= <i>h</i> <=27<br>-14<= <i>k</i> <=14<br>-27<= <i>l</i> <=27 | -26<= <i>h</i> <=26<br>-37<= <i>k</i> <=37<br>-17<= <i>l</i> <=19 |
| Collected reflections                                                                                 | 93876                                                                          | 76031                                                             | 210709                                                            |
| Unique                                                                                                | 17937 [R(int) = 0.0846]                                                        | 22242 [R(int) = 0.0932]                                           | 20088 [R(int) = 0.0590]                                           |
| Parameters                                                                                            | 1130                                                                           | 1116                                                              | 1224                                                              |
| Goodness of fit on <i>F</i> <sup>2</sup>                                                              | 1.038                                                                          | 1.009                                                             | 1.021                                                             |
| <i>R</i> <sub>1</sub> <sup>a</sup> , <i>wR</i> <sub>2</sub> <sup>a</sup> [ <i>I</i> > 2σ( <i>I</i> )] | <i>R</i> <sub>1</sub> = 0.0557<br><i>wR</i> <sub>2</sub> = 0.1494              | <i>R</i> <sub>1</sub> = 0.0687<br><i>wR</i> <sub>2</sub> = 0.1773 | <i>R</i> <sub>1</sub> = 0.0478<br><i>wR</i> <sub>2</sub> = 0.1220 |
| <i>R</i> <sub>1</sub> , <i>wR</i> <sub>2</sub> indices (all data)                                     | <i>R</i> <sub>1</sub> = 0.0698<br><i>wR</i> <sub>2</sub> = 0.1610              | <i>R</i> <sub>1</sub> = 0.0832<br><i>wR</i> <sub>2</sub> = 0.1910 | <i>R</i> <sub>1</sub> = 0.0553<br><i>wR</i> <sub>2</sub> = 0.1290 |
| Max/min residual density(e Å <sup>-3</sup> )                                                          | 1.60 and -0.92                                                                 | 1.57 and -1.23                                                    | 1.75 and -1.12                                                    |

<sup>a</sup>  $R_1 = \sum || F_0| - |F_c||$  (based on reflections with  $F_o^2 > 2\sigma F^2$ ).  $wR_2 = [\sum [w(F_o^2 - F_c^2)^2] / \sum [w(F_o^2)^2]]^{1/2}$ ;  $w = 1/[\sigma^2(F_o^2) + (0.095P)^2]$ ;  $P = [\max(F_o^2, 0) + 2F_c^2]/3$  (also with  $F_o^2 > 2\sigma F^2$ ).

## Computational details

The optimization of reactants, transition states, IRC, and products were carried out by employing DFT hybrid functional (B3PW91)<sup>4</sup> along with small core pseudopotential Stuttgart basis set<sup>5</sup> for yttrium, aluminum atoms (additional polarization<sup>6</sup> for aluminum atoms) and Pople basis set<sup>7</sup> (6-31G\*\*) for the rest of the atoms. Frequency calculations were performed to locate saddle points for transition state structures, minima for the rest of the structures, and for obtaining thermal corrections over the energies. Dispersion corrections were included in our calculations by employing the D3 version of Grimme's dispersion with Becke-Johnson damping.<sup>8</sup> Solvent corrections using the SMD model<sup>9</sup> were included by considering the reaction in toluene. All the calculations were performed using the Gaussian 09 suite of programs.<sup>10</sup>

**Table S3.** Comparison of structural parameters of DFT optimized geometry and X-ray structure **2-Y**

| Atom labels | X-ray | DFT        |               |
|-------------|-------|------------|---------------|
|             |       | Dispersion | No dispersion |
| Y1-N3       | 2.27  | 2.32       | 2.36          |
| Y1-N4       | 2.34  | 2.35       | 2.37          |
| Y1-C6       | 2.34  | 2.40       | 2.41          |
| Y1-C13      | 2.51  | 2.56       | 2.67          |
| Y1-C34      | 2.53  | 2.55       | 2.67          |
| Al2-C13     | 2.10  | 2.12       | 2.14          |
| Al2-C20     | 1.96  | 1.99       | 2.01          |
| Al2-C27     | 1.98  | 2.00       | 2.01          |
| Al2-C34     | 2.09  | 2.11       | 2.10          |

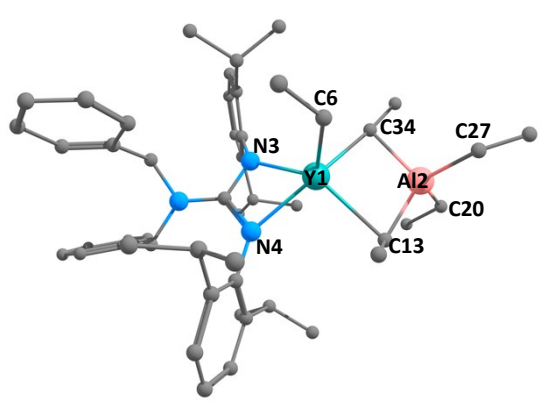

## Optimized geometries

### Y-1

|   |              |              |              |
|---|--------------|--------------|--------------|
| Y | 16.595357000 | -0.156696000 | 19.712176000 |
| N | 17.560380000 | 1.735809000  | 18.610503000 |
| N | 18.684086000 | 3.560981000  | 19.720619000 |
| N | 15.090060000 | -0.909823000 | 17.643152000 |
| C | 17.996863000 | 2.365876000  | 19.716677000 |
| C | 19.245680000 | 4.143369000  | 18.498653000 |
| H | 18.604609000 | 4.957436000  | 18.143934000 |
| H | 19.246043000 | 3.378906000  | 17.725084000 |
| C | 20.649212000 | 4.672473000  | 18.660825000 |

|   |              |              |              |
|---|--------------|--------------|--------------|
| C | 21.697308000 | 3.846995000  | 19.076172000 |
| H | 21.499768000 | 2.804987000  | 19.301681000 |
| C | 22.989660000 | 4.349507000  | 19.202825000 |
| H | 23.792876000 | 3.696356000  | 19.532203000 |
| C | 23.253914000 | 5.685394000  | 18.901555000 |
| H | 24.262227000 | 6.077709000  | 18.999074000 |
| C | 22.217507000 | 6.512978000  | 18.473218000 |
| H | 22.412264000 | 7.555750000  | 18.239276000 |
| C | 20.924051000 | 6.008530000  | 18.360486000 |
| H | 20.110412000 | 6.661515000  | 18.056851000 |
| C | 17.498985000 | 2.122008000  | 17.264816000 |
| C | 18.181900000 | 1.297532000  | 16.330175000 |
| C | 18.018482000 | 1.541692000  | 14.965694000 |
| H | 18.534294000 | 0.916538000  | 14.244390000 |
| C | 17.207309000 | 2.576840000  | 14.511005000 |
| H | 17.088941000 | 2.752034000  | 13.445428000 |
| C | 16.558179000 | 3.391722000  | 15.430809000 |
| H | 15.933629000 | 4.203508000  | 15.071099000 |
| C | 16.687627000 | 3.188818000  | 16.807340000 |
| C | 19.087551000 | 0.183289000  | 16.828663000 |
| H | 18.527724000 | -0.376300000 | 17.590178000 |
| C | 20.333390000 | 0.740873000  | 17.525594000 |
| H | 20.919557000 | 1.367896000  | 16.844758000 |
| H | 20.975232000 | -0.076523000 | 17.870869000 |
| H | 20.058403000 | 1.338249000  | 18.396076000 |
| C | 19.500382000 | -0.819716000 | 15.754481000 |
| H | 20.164248000 | -0.368647000 | 15.007773000 |
| H | 18.640196000 | -1.243705000 | 15.226538000 |
| H | 20.047853000 | -1.647706000 | 16.216201000 |
| C | 15.945533000 | 4.084790000  | 17.781677000 |
| H | 16.521448000 | 4.096200000  | 18.710463000 |
| C | 14.563076000 | 3.522498000  | 18.119011000 |
| H | 13.947535000 | 3.426989000  | 17.217784000 |
| H | 14.037100000 | 4.179161000  | 18.820647000 |
| H | 14.643084000 | 2.538370000  | 18.582014000 |
| C | 15.822968000 | 5.531486000  | 17.301242000 |
| H | 16.792341000 | 5.956161000  | 17.022311000 |
| H | 15.396103000 | 6.154915000  | 18.092958000 |
| H | 15.155658000 | 5.619419000  | 16.437216000 |
| C | 14.164050000 | 0.068999000  | 20.131344000 |
| H | 13.730789000 | 0.297538000  | 21.109473000 |
| H | 13.964954000 | 0.928614000  | 19.478875000 |

|   |              |              |              |
|---|--------------|--------------|--------------|
| C | 13.641991000 | -1.198686000 | 19.597162000 |
| C | 14.122355000 | -1.722572000 | 18.365704000 |
| C | 13.716310000 | -2.973930000 | 17.908738000 |
| H | 14.101803000 | -3.366273000 | 16.973996000 |
| C | 12.831951000 | -3.752021000 | 18.655442000 |
| H | 12.536747000 | -4.732544000 | 18.294453000 |
| C | 12.358314000 | -3.268452000 | 19.871996000 |
| H | 11.677064000 | -3.868263000 | 20.470173000 |
| C | 12.755470000 | -2.015357000 | 20.325599000 |
| H | 12.375689000 | -1.639459000 | 21.273333000 |
| C | 14.423572000 | 0.172604000  | 16.895035000 |
| H | 13.850828000 | -0.242488000 | 16.052816000 |
| H | 15.171577000 | 0.869317000  | 16.507732000 |
| H | 13.733558000 | 0.711473000  | 17.542016000 |
| C | 15.922955000 | -1.661302000 | 16.700018000 |
| H | 16.412181000 | -2.489975000 | 17.210547000 |
| H | 16.677113000 | -0.983663000 | 16.296592000 |
| H | 15.339840000 | -2.047027000 | 15.851108000 |
| N | 17.672590000 | 1.667299000  | 20.819667000 |
| C | 18.924121000 | 4.316462000  | 20.951222000 |
| H | 19.951489000 | 4.156295000  | 21.294806000 |
| H | 18.269112000 | 3.924650000  | 21.725766000 |
| C | 18.683519000 | 5.799576000  | 20.821532000 |
| C | 17.476902000 | 6.305149000  | 20.332219000 |
| H | 16.698797000 | 5.618043000  | 20.019778000 |
| C | 17.266748000 | 7.678894000  | 20.242004000 |
| H | 16.325300000 | 8.056517000  | 19.853013000 |
| C | 18.258889000 | 8.567232000  | 20.655984000 |
| H | 18.095319000 | 9.638972000  | 20.586826000 |
| C | 19.460555000 | 8.071543000  | 21.159331000 |
| H | 20.241232000 | 8.755024000  | 21.481019000 |
| C | 19.670587000 | 6.696959000  | 21.235146000 |
| H | 20.619378000 | 6.311704000  | 21.598724000 |
| C | 18.056082000 | 1.791016000  | 22.162144000 |
| C | 17.015624000 | 1.974793000  | 23.112174000 |
| C | 17.325126000 | 1.934358000  | 24.472593000 |
| H | 16.535627000 | 2.068525000  | 25.205001000 |
| C | 18.630701000 | 1.728219000  | 24.907722000 |
| H | 18.855383000 | 1.696815000  | 25.970166000 |
| C | 19.647766000 | 1.576298000  | 23.972632000 |
| H | 20.666496000 | 1.429844000  | 24.317480000 |
| C | 19.390011000 | 1.605381000  | 22.599510000 |



|   |              |              |              |
|---|--------------|--------------|--------------|
| C | 15.598721000 | 2.237162000  | 22.631568000 |
| H | 15.388768000 | 1.516359000  | 21.831308000 |
| C | 15.471769000 | 3.630462000  | 22.004572000 |
| H | 15.725705000 | 4.414635000  | 22.726344000 |
| H | 14.445426000 | 3.803267000  | 21.663227000 |
| H | 16.129404000 | 3.733856000  | 21.140325000 |
| C | 14.527441000 | 2.051805000  | 23.703331000 |
| H | 14.589487000 | 2.822277000  | 24.480765000 |
| H | 14.592359000 | 1.074596000  | 24.192627000 |
| H | 13.534726000 | 2.131224000  | 23.248920000 |
| C | 20.525483000 | 1.419401000  | 21.609440000 |
| H | 20.237282000 | 1.929371000  | 20.686640000 |
| C | 20.731347000 | -0.055676000 | 21.259452000 |
| H | 20.968573000 | -0.641711000 | 22.154011000 |
| H | 21.556133000 | -0.174556000 | 20.548336000 |
| H | 19.837173000 | -0.481324000 | 20.802712000 |
| C | 21.844255000 | 2.034334000  | 22.081410000 |
| H | 21.728650000 | 3.082453000  | 22.374384000 |
| H | 22.587627000 | 1.989975000  | 21.279609000 |
| H | 22.265630000 | 1.490475000  | 22.933703000 |
| N | 16.702322000 | -1.823081000 | 21.825335000 |
| C | 17.976841000 | -2.186537000 | 19.334015000 |
| H | 18.381376000 | -2.465056000 | 18.355981000 |
| H | 18.831261000 | -1.938196000 | 19.976066000 |
| C | 17.130098000 | -3.253991000 | 19.889403000 |
| C | 16.450694000 | -3.071340000 | 21.124326000 |
| C | 15.559098000 | -4.026996000 | 21.605474000 |
| H | 15.039540000 | -3.863724000 | 22.543451000 |
| C | 15.298777000 | -5.187596000 | 20.877689000 |
| H | 14.588059000 | -5.915823000 | 21.256434000 |
| C | 15.941466000 | -5.385651000 | 19.658313000 |
| H | 15.741831000 | -6.281093000 | 19.075130000 |
| C | 16.840084000 | -4.436866000 | 19.181520000 |
| H | 17.343256000 | -4.601147000 | 18.230855000 |
| C | 17.979316000 | -1.874874000 | 22.560344000 |
| H | 17.904828000 | -2.575402000 | 23.405196000 |
| H | 18.226450000 | -0.881382000 | 22.943331000 |
| H | 18.780709000 | -2.216412000 | 21.907285000 |
| C | 15.654005000 | -1.440610000 | 22.775282000 |
| H | 14.682861000 | -1.437423000 | 22.281082000 |
| H | 15.880009000 | -0.438365000 | 23.143078000 |
| H | 15.618146000 | -2.112866000 | 23.645422000 |

**Int-1**

|   |              |              |              |
|---|--------------|--------------|--------------|
| Y | 16.298274000 | 0.338177000  | 19.831374000 |
| N | 17.356143000 | 2.098286000  | 18.631073000 |
| N | 18.731700000 | 3.824493000  | 19.608061000 |
| N | 14.630611000 | -0.271576000 | 17.803697000 |
| C | 17.932030000 | 2.705567000  | 19.684908000 |
| C | 19.255874000 | 4.321301000  | 18.333897000 |
| H | 18.662851000 | 5.175408000  | 17.991252000 |
| H | 19.140815000 | 3.537836000  | 17.588688000 |
| C | 20.705980000 | 4.732090000  | 18.382618000 |
| C | 21.696791000 | 3.875528000  | 18.868189000 |
| H | 21.420375000 | 2.894672000  | 19.238212000 |
| C | 23.032108000 | 4.271175000  | 18.883429000 |
| H | 23.790275000 | 3.596550000  | 19.271226000 |
| C | 23.395428000 | 5.527060000  | 18.398322000 |
| H | 24.436786000 | 5.836238000  | 18.409959000 |
| C | 22.414694000 | 6.382818000  | 17.899301000 |
| H | 22.687034000 | 7.365280000  | 17.524301000 |
| C | 21.079720000 | 5.987202000  | 17.897154000 |
| H | 20.311782000 | 6.667176000  | 17.537941000 |
| C | 17.268466000 | 2.447908000  | 17.276849000 |
| C | 17.838299000 | 1.543348000  | 16.341481000 |
| C | 17.616147000 | 1.752521000  | 14.979449000 |
| H | 18.040350000 | 1.065114000  | 14.254988000 |
| C | 16.858406000 | 2.830699000  | 14.531903000 |
| H | 16.689656000 | 2.976015000  | 13.468645000 |
| C | 16.330217000 | 3.728697000  | 15.452447000 |
| H | 15.751548000 | 4.574483000  | 15.094432000 |
| C | 16.522676000 | 3.563646000  | 16.826740000 |
| C | 18.694371000 | 0.388294000  | 16.836507000 |
| H | 18.157470000 | -0.087228000 | 17.669024000 |
| C | 20.025149000 | 0.886173000  | 17.412068000 |
| H | 20.605985000 | 1.426020000  | 16.656327000 |
| H | 20.627976000 | 0.042178000  | 17.764020000 |
| H | 19.862733000 | 1.551649000  | 18.261159000 |
| C | 18.956949000 | -0.692821000 | 15.791051000 |
| H | 19.600871000 | -0.327986000 | 14.982681000 |
| H | 18.035093000 | -1.073428000 | 15.339633000 |
| H | 19.471995000 | -1.538842000 | 16.257027000 |
| C | 15.922824000 | 4.557073000  | 17.805884000 |
| H | 16.536874000 | 4.530010000  | 18.709909000 |
| C | 14.503467000 | 4.164790000  | 18.223211000 |

|   |              |              |              |
|---|--------------|--------------|--------------|
| H | 13.842152000 | 4.092843000  | 17.353369000 |
| H | 14.082062000 | 4.908868000  | 18.907758000 |
| H | 14.495809000 | 3.203656000  | 18.738885000 |
| C | 15.935222000 | 5.994129000  | 17.281714000 |
| H | 16.928708000 | 6.297291000  | 16.937119000 |
| H | 15.625729000 | 6.685439000  | 18.071627000 |
| H | 15.234952000 | 6.130585000  | 16.450803000 |
| C | 13.894734000 | 0.721042000  | 20.325894000 |
| H | 13.511189000 | 1.018730000  | 21.302688000 |
| H | 13.863928000 | 1.599146000  | 19.669881000 |
| C | 13.194310000 | -0.425317000 | 19.774639000 |
| C | 13.570011000 | -0.965131000 | 18.510760000 |
| C | 12.977710000 | -2.119242000 | 18.019488000 |
| H | 13.286291000 | -2.519790000 | 17.059860000 |
| C | 11.996301000 | -2.799509000 | 18.751273000 |
| H | 11.555711000 | -3.707731000 | 18.353905000 |
| C | 11.626264000 | -2.317147000 | 19.997075000 |
| H | 10.897557000 | -2.850219000 | 20.598723000 |
| C | 12.193660000 | -1.130654000 | 20.492436000 |
| H | 11.970319000 | -0.813310000 | 21.509809000 |
| C | 14.080970000 | 0.883493000  | 17.065379000 |
| H | 13.451162000 | 0.538276000  | 16.234095000 |
| H | 14.896907000 | 1.489604000  | 16.666262000 |
| H | 13.464909000 | 1.492377000  | 17.723098000 |
| C | 15.358471000 | -1.109156000 | 16.844585000 |
| H | 15.708456000 | -2.020217000 | 17.329326000 |
| H | 16.210624000 | -0.537405000 | 16.476093000 |
| H | 14.738952000 | -1.375038000 | 15.975749000 |
| N | 17.623343000 | 2.057951000  | 20.821906000 |
| C | 19.104035000 | 4.597432000  | 20.796797000 |
| H | 20.115074000 | 4.327205000  | 21.119254000 |
| H | 18.429976000 | 4.325744000  | 21.605811000 |
| C | 19.043424000 | 6.090372000  | 20.595541000 |
| C | 17.879439000 | 6.718095000  | 20.145387000 |
| H | 17.000550000 | 6.120306000  | 19.930504000 |
| C | 17.840904000 | 8.098668000  | 19.968301000 |
| H | 16.931737000 | 8.571334000  | 19.607484000 |
| C | 18.965036000 | 8.872243000  | 20.257166000 |
| H | 18.936437000 | 9.949331000  | 20.118397000 |
| C | 20.124417000 | 8.256051000  | 20.725134000 |
| H | 21.006303000 | 8.849595000  | 20.948903000 |
| C | 20.162544000 | 6.873314000  | 20.886056000 |

|   |              |              |              |
|---|--------------|--------------|--------------|
| H | 21.077678000 | 6.389762000  | 21.217321000 |
| C | 18.054515000 | 2.222858000  | 22.144468000 |
| C | 17.069024000 | 2.566440000  | 23.105785000 |
| C | 17.426930000 | 2.604244000  | 24.454602000 |
| H | 16.683114000 | 2.868183000  | 25.199347000 |
| C | 18.725321000 | 2.311990000  | 24.861838000 |
| H | 18.987587000 | 2.344749000  | 25.915595000 |
| C | 19.687770000 | 1.986505000  | 23.912160000 |
| H | 20.700174000 | 1.768924000  | 24.237999000 |
| C | 19.379413000 | 1.936040000  | 22.550429000 |
| C | 15.662469000 | 2.911620000  | 22.646327000 |
| H | 15.371661000 | 2.156776000  | 21.904068000 |
| C | 15.623748000 | 4.265063000  | 21.926688000 |
| H | 15.968861000 | 5.070746000  | 22.583929000 |
| H | 14.601770000 | 4.499954000  | 21.610796000 |
| H | 16.252541000 | 4.257211000  | 21.034446000 |
| C | 14.613734000 | 2.884722000  | 23.754849000 |
| H | 14.759966000 | 3.698764000  | 24.474118000 |
| H | 14.617016000 | 1.941751000  | 24.310733000 |
| H | 13.616754000 | 3.011411000  | 23.322225000 |
| C | 20.439542000 | 1.571117000  | 21.527625000 |
| H | 20.176062000 | 2.084817000  | 20.599001000 |
| C | 20.431424000 | 0.073148000  | 21.217576000 |
| H | 20.641110000 | -0.516745000 | 22.116331000 |
| H | 21.190771000 | -0.171016000 | 20.466511000 |
| H | 19.462742000 | -0.237296000 | 20.823300000 |
| C | 21.845383000 | 2.024736000  | 21.920074000 |
| H | 21.877887000 | 3.090558000  | 22.167021000 |
| H | 22.540756000 | 1.846958000  | 21.093628000 |
| H | 22.228881000 | 1.466741000  | 22.780929000 |
| N | 16.332063000 | -1.236329000 | 22.017567000 |
| C | 17.423753000 | -1.839886000 | 19.477406000 |
| H | 17.723751000 | -2.191491000 | 18.485425000 |
| H | 18.337730000 | -1.721885000 | 20.070875000 |
| C | 16.433557000 | -2.741296000 | 20.090803000 |
| C | 15.847432000 | -2.430338000 | 21.348717000 |
| C | 14.822650000 | -3.213686000 | 21.878039000 |
| H | 14.381390000 | -2.955914000 | 22.834392000 |
| C | 14.335476000 | -4.316895000 | 21.179007000 |
| H | 13.526200000 | -4.907976000 | 21.596597000 |
| C | 14.884801000 | -4.636012000 | 19.939227000 |
| H | 14.510021000 | -5.488613000 | 19.379168000 |

|    |              |              |              |
|----|--------------|--------------|--------------|
| C  | 15.913999000 | -3.862774000 | 19.414398000 |
| H  | 16.345261000 | -4.122660000 | 18.450087000 |
| C  | 17.628940000 | -1.471580000 | 22.677927000 |
| H  | 17.499344000 | -2.133660000 | 23.546544000 |
| H  | 18.044910000 | -0.519104000 | 23.016408000 |
| H  | 18.328604000 | -1.944592000 | 21.991257000 |
| C  | 15.417723000 | -0.686272000 | 23.022182000 |
| H  | 14.433506000 | -0.521485000 | 22.585699000 |
| H  | 15.826725000 | 0.265923000  | 23.364498000 |
| H  | 15.323152000 | -1.342479000 | 23.900030000 |
| Al | 10.183554000 | 0.230746000  | 19.823351000 |
| C  | 8.732381000  | -0.886291000 | 20.617080000 |
| H  | 7.941686000  | -0.183671000 | 20.928116000 |
| H  | 9.079938000  | -1.340835000 | 21.557050000 |
| C  | 8.116904000  | -1.958908000 | 19.714286000 |
| H  | 7.678465000  | -1.517562000 | 18.811103000 |
| H  | 8.864973000  | -2.683432000 | 19.370364000 |
| H  | 7.318867000  | -2.532816000 | 20.207265000 |
| C  | 10.629842000 | 1.850912000  | 20.896409000 |
| H  | 11.570270000 | 2.301889000  | 20.554915000 |
| H  | 9.849408000  | 2.583151000  | 20.627225000 |
| C  | 10.650403000 | 1.687671000  | 22.418118000 |
| H  | 9.717729000  | 1.247140000  | 22.791998000 |
| H  | 10.786728000 | 2.638284000  | 22.953882000 |
| H  | 11.461376000 | 1.024915000  | 22.747339000 |
| C  | 10.307274000 | 0.407951000  | 17.845750000 |
| H  | 11.135685000 | -0.211692000 | 17.479591000 |
| H  | 9.405773000  | -0.022770000 | 17.386088000 |
| C  | 10.486791000 | 1.852712000  | 17.363167000 |
| H  | 9.614093000  | 2.472196000  | 17.605294000 |
| H  | 10.635870000 | 1.929738000  | 16.276280000 |
| H  | 11.346541000 | 2.339854000  | 17.838725000 |

**TS-1**

|   |              |              |              |
|---|--------------|--------------|--------------|
| Y | 16.200685000 | 0.254757000  | 19.800521000 |
| N | 17.265735000 | 2.068680000  | 18.660561000 |
| N | 18.607230000 | 3.779876000  | 19.710937000 |
| N | 14.553887000 | -0.273971000 | 17.734349000 |
| C | 17.825826000 | 2.644682000  | 19.739705000 |
| C | 19.139995000 | 4.329132000  | 18.462024000 |
| H | 18.537833000 | 5.185583000  | 18.140977000 |
| H | 19.048040000 | 3.570419000  | 17.688550000 |

|   |              |              |              |
|---|--------------|--------------|--------------|
| C | 20.582890000 | 4.759874000  | 18.545396000 |
| C | 21.580630000 | 3.897514000  | 19.005723000 |
| H | 21.314634000 | 2.897228000  | 19.328353000 |
| C | 22.909556000 | 4.311379000  | 19.054889000 |
| H | 23.673153000 | 3.631620000  | 19.422582000 |
| C | 23.260089000 | 5.591855000  | 18.627965000 |
| H | 24.296551000 | 5.915077000  | 18.665733000 |
| C | 22.272816000 | 6.453680000  | 18.152861000 |
| H | 22.534836000 | 7.454888000  | 17.822725000 |
| C | 20.943780000 | 6.039671000  | 18.118110000 |
| H | 20.170653000 | 6.723423000  | 17.777693000 |
| C | 17.191115000 | 2.469744000  | 17.319370000 |
| C | 17.788350000 | 1.614577000  | 16.355614000 |
| C | 17.595591000 | 1.886370000  | 14.999983000 |
| H | 18.043295000 | 1.237540000  | 14.254270000 |
| C | 16.838022000 | 2.977805000  | 14.585991000 |
| H | 16.693871000 | 3.172950000  | 13.527055000 |
| C | 16.278223000 | 3.825299000  | 15.535459000 |
| H | 15.699864000 | 4.682364000  | 15.204919000 |
| C | 16.442416000 | 3.597376000  | 16.904341000 |
| C | 18.638418000 | 0.442505000  | 16.816424000 |
| H | 18.081839000 | -0.068267000 | 17.612867000 |
| C | 19.954591000 | 0.915278000  | 17.444578000 |
| H | 20.552917000 | 1.488607000  | 16.728012000 |
| H | 20.549825000 | 0.056485000  | 17.772893000 |
| H | 19.770847000 | 1.542007000  | 18.318786000 |
| C | 18.921840000 | -0.593979000 | 15.732425000 |
| H | 19.579960000 | -0.198406000 | 14.950155000 |
| H | 18.007258000 | -0.955515000 | 15.251307000 |
| H | 19.428652000 | -1.458321000 | 16.173392000 |
| C | 15.815582000 | 4.536203000  | 17.918961000 |
| H | 16.435024000 | 4.496822000  | 18.818813000 |
| C | 14.414990000 | 4.077986000  | 18.327191000 |
| H | 13.744044000 | 4.044967000  | 17.462450000 |
| H | 13.983261000 | 4.762307000  | 19.063941000 |
| H | 14.441588000 | 3.083721000  | 18.774761000 |
| C | 15.774796000 | 5.991130000  | 17.450424000 |
| H | 16.756818000 | 6.345951000  | 17.122492000 |
| H | 15.436434000 | 6.638924000  | 18.265072000 |
| H | 15.071289000 | 6.132373000  | 16.623023000 |
| C | 13.781637000 | 0.569405000  | 20.313561000 |
| H | 13.406872000 | 0.775514000  | 21.318809000 |

|   |              |              |              |
|---|--------------|--------------|--------------|
| H | 13.658541000 | 1.473221000  | 19.709307000 |
| C | 13.177267000 | -0.631342000 | 19.724452000 |
| C | 13.577551000 | -1.088016000 | 18.433255000 |
| C | 13.109410000 | -2.292997000 | 17.924920000 |
| H | 13.431950000 | -2.633615000 | 16.947268000 |
| C | 12.241470000 | -3.098054000 | 18.668968000 |
| H | 11.894783000 | -4.041086000 | 18.258842000 |
| C | 11.855223000 | -2.691192000 | 19.938755000 |
| H | 11.207187000 | -3.320144000 | 20.541719000 |
| C | 12.310574000 | -1.476939000 | 20.453038000 |
| H | 12.035785000 | -1.183328000 | 21.461620000 |
| C | 13.908459000 | 0.880102000  | 17.080549000 |
| H | 13.301251000 | 0.542005000  | 16.229602000 |
| H | 14.671802000 | 1.573550000  | 16.721040000 |
| H | 13.253143000 | 1.394280000  | 17.780607000 |
| C | 15.317615000 | -0.994726000 | 16.710360000 |
| H | 15.783243000 | -1.882248000 | 17.138348000 |
| H | 16.089327000 | -0.322868000 | 16.331363000 |
| H | 14.688874000 | -1.289175000 | 15.857542000 |
| N | 17.519744000 | 1.951542000  | 20.850691000 |
| C | 18.946390000 | 4.521980000  | 20.928788000 |
| H | 19.961131000 | 4.268419000  | 21.252725000 |
| H | 18.272521000 | 4.204864000  | 21.721216000 |
| C | 18.848316000 | 6.019521000  | 20.779491000 |
| C | 17.668754000 | 6.635271000  | 20.354187000 |
| H | 16.804424000 | 6.025314000  | 20.116989000 |
| C | 17.595327000 | 8.020348000  | 20.230853000 |
| H | 16.673662000 | 8.483542000  | 19.890048000 |
| C | 18.700154000 | 8.810046000  | 20.548749000 |
| H | 18.644165000 | 9.890729000  | 20.452701000 |
| C | 19.875463000 | 8.205261000  | 20.991115000 |
| H | 20.742467000 | 8.811695000  | 21.237398000 |
| C | 19.948090000 | 6.818670000  | 21.098824000 |
| H | 20.875155000 | 6.345491000  | 21.411221000 |
| C | 17.925377000 | 2.077848000  | 22.185416000 |
| C | 16.913143000 | 2.352016000  | 23.142493000 |
| C | 17.241500000 | 2.326680000  | 24.498958000 |
| H | 16.475298000 | 2.532772000  | 25.239340000 |
| C | 18.538478000 | 2.046883000  | 24.919305000 |
| H | 18.777983000 | 2.030296000  | 25.978829000 |
| C | 19.529430000 | 1.802745000  | 23.974665000 |
| H | 20.542015000 | 1.600399000  | 24.309566000 |

|   |              |              |              |
|---|--------------|--------------|--------------|
| C | 19.250404000 | 1.812294000  | 22.605670000 |
| C | 15.511330000 | 2.703344000  | 22.672843000 |
| H | 15.242541000 | 1.987797000  | 21.884892000 |
| C | 15.475644000 | 4.092538000  | 22.024504000 |
| H | 15.814805000 | 4.862613000  | 22.725992000 |
| H | 14.457107000 | 4.343994000  | 21.711821000 |
| H | 16.112339000 | 4.129172000  | 21.138594000 |
| C | 14.439520000 | 2.605064000  | 23.755127000 |
| H | 14.559260000 | 3.380474000  | 24.520606000 |
| H | 14.443613000 | 1.633008000  | 24.258687000 |
| H | 13.450511000 | 2.744306000  | 23.307542000 |
| C | 20.344879000 | 1.530575000  | 21.592663000 |
| H | 20.078243000 | 2.066466000  | 20.678023000 |
| C | 20.409327000 | 0.046444000  | 21.227629000 |
| H | 20.622570000 | -0.567594000 | 22.109307000 |
| H | 21.196747000 | -0.136777000 | 20.488313000 |
| H | 19.465203000 | -0.289780000 | 20.797088000 |
| C | 21.721496000 | 2.028199000  | 22.033994000 |
| H | 21.701038000 | 3.081154000  | 22.332400000 |
| H | 22.439808000 | 1.924413000  | 21.214669000 |
| H | 22.114697000 | 1.447062000  | 22.875022000 |
| N | 16.303324000 | -1.425583000 | 21.882967000 |
| C | 17.402599000 | -1.854457000 | 19.311797000 |
| H | 17.718519000 | -2.150697000 | 18.307032000 |
| H | 18.314925000 | -1.681909000 | 19.897509000 |
| C | 16.510506000 | -2.860489000 | 19.911241000 |
| C | 15.923986000 | -2.645173000 | 21.187697000 |
| C | 15.006264000 | -3.547713000 | 21.721607000 |
| H | 14.563035000 | -3.363073000 | 22.694241000 |
| C | 14.626514000 | -4.682212000 | 21.005551000 |
| H | 13.900066000 | -5.370607000 | 21.426623000 |
| C | 15.169824000 | -4.904926000 | 19.742709000 |
| H | 14.874319000 | -5.778536000 | 19.167390000 |
| C | 16.093327000 | -4.010236000 | 19.213137000 |
| H | 16.519218000 | -4.194069000 | 18.229117000 |
| C | 17.611803000 | -1.580092000 | 22.545734000 |
| H | 17.531036000 | -2.282526000 | 23.388093000 |
| H | 17.951176000 | -0.611886000 | 22.922185000 |
| H | 18.348457000 | -1.972886000 | 21.847322000 |
| C | 15.343480000 | -0.983503000 | 22.899386000 |
| H | 14.346223000 | -0.904376000 | 22.468259000 |
| H | 15.661882000 | -0.004525000 | 23.262571000 |



|    |              |              |              |
|----|--------------|--------------|--------------|
| H  | 15.312748000 | -1.663592000 | 23.763190000 |
| Al | 10.646521000 | 0.757128000  | 19.627722000 |
| C  | 9.805468000  | 0.415550000  | 21.399094000 |
| H  | 9.131934000  | 1.275870000  | 21.551155000 |
| H  | 10.554704000 | 0.513322000  | 22.198092000 |
| C  | 9.009294000  | -0.879091000 | 21.569341000 |
| H  | 8.204828000  | -0.954554000 | 20.827984000 |
| H  | 9.638941000  | -1.764857000 | 21.432110000 |
| H  | 8.539916000  | -0.968377000 | 22.559172000 |
| C  | 11.178122000 | 2.661924000  | 19.391326000 |
| H  | 11.890543000 | 2.809841000  | 18.570477000 |
| H  | 10.242819000 | 3.119849000  | 19.020720000 |
| C  | 11.640644000 | 3.420635000  | 20.636555000 |
| H  | 10.931636000 | 3.307088000  | 21.465630000 |
| H  | 11.756832000 | 4.499933000  | 20.464525000 |
| H  | 12.605035000 | 3.045591000  | 20.994605000 |
| C  | 10.065405000 | -0.200253000 | 17.989837000 |
| H  | 10.740438000 | -1.044444000 | 17.801948000 |
| H  | 9.087988000  | -0.663304000 | 18.193553000 |
| C  | 9.969882000  | 0.674719000  | 16.735267000 |
| H  | 9.233280000  | 1.479712000  | 16.849953000 |
| H  | 9.678405000  | 0.105026000  | 15.841200000 |
| H  | 10.925781000 | 1.159893000  | 16.504212000 |

## Int-2

|   |              |              |              |
|---|--------------|--------------|--------------|
| Y | 15.963791000 | 0.225301000  | 19.675952000 |
| N | 17.139915000 | 1.963056000  | 18.558561000 |
| N | 18.458393000 | 3.678508000  | 19.638013000 |
| N | 14.561388000 | -0.152021000 | 17.533641000 |
| C | 17.662343000 | 2.556720000  | 19.651353000 |
| C | 19.046436000 | 4.214628000  | 18.403595000 |
| H | 18.441577000 | 5.049538000  | 18.036330000 |
| H | 19.013397000 | 3.438620000  | 17.643747000 |
| C | 20.472572000 | 4.679309000  | 18.560403000 |
| C | 21.483911000 | 3.800222000  | 18.956308000 |
| H | 21.239929000 | 2.764425000  | 19.165740000 |
| C | 22.797889000 | 4.242038000  | 19.085176000 |
| H | 23.572573000 | 3.548617000  | 19.400331000 |
| C | 23.120090000 | 5.569766000  | 18.804746000 |
| H | 24.145352000 | 5.914821000  | 18.904494000 |
| C | 22.120558000 | 6.449675000  | 18.393722000 |
| H | 22.360820000 | 7.486501000  | 18.176561000 |

|   |              |              |              |
|---|--------------|--------------|--------------|
| C | 20.805236000 | 6.006331000  | 18.279346000 |
| H | 20.020389000 | 6.701000000  | 17.992866000 |
| C | 17.139217000 | 2.372565000  | 17.211678000 |
| C | 17.817229000 | 1.544147000  | 16.279989000 |
| C | 17.734595000 | 1.846487000  | 14.919256000 |
| H | 18.250872000 | 1.220104000  | 14.199390000 |
| C | 16.993275000 | 2.933322000  | 14.468013000 |
| H | 16.930707000 | 3.150040000  | 13.405417000 |
| C | 16.345735000 | 3.749844000  | 15.387446000 |
| H | 15.783825000 | 4.606918000  | 15.030328000 |
| C | 16.411885000 | 3.500186000  | 16.761106000 |
| C | 18.627928000 | 0.356812000  | 16.769633000 |
| H | 18.029581000 | -0.145580000 | 17.538162000 |
| C | 19.923699000 | 0.805816000  | 17.452352000 |
| H | 20.555767000 | 1.378792000  | 16.765208000 |
| H | 20.496039000 | -0.062201000 | 17.796039000 |
| H | 19.710959000 | 1.428082000  | 18.323354000 |
| C | 18.933654000 | -0.679056000 | 15.690818000 |
| H | 19.640522000 | -0.298751000 | 14.944580000 |
| H | 18.031549000 | -1.005250000 | 15.163313000 |
| H | 19.392955000 | -1.562517000 | 16.146071000 |
| C | 15.730740000 | 4.441037000  | 17.738004000 |
| H | 16.292369000 | 4.385718000  | 18.674308000 |
| C | 14.299172000 | 4.014858000  | 18.056943000 |
| H | 13.675969000 | 4.006139000  | 17.157076000 |
| H | 13.845049000 | 4.699114000  | 18.779001000 |
| H | 14.273011000 | 3.015009000  | 18.490060000 |
| C | 15.743066000 | 5.899777000  | 17.276328000 |
| H | 16.748742000 | 6.243329000  | 17.014719000 |
| H | 15.358767000 | 6.547269000  | 18.070708000 |
| H | 15.096539000 | 6.054466000  | 16.406333000 |
| C | 13.289905000 | 0.699033000  | 20.025872000 |
| H | 13.408351000 | 0.848739000  | 21.100192000 |
| H | 13.745229000 | 1.484412000  | 19.423386000 |
| C | 13.291280000 | -0.696745000 | 19.558766000 |
| C | 13.838373000 | -1.125323000 | 18.321316000 |
| C | 13.716065000 | -2.459692000 | 17.914668000 |
| H | 14.144401000 | -2.776091000 | 16.971863000 |
| C | 13.069905000 | -3.392191000 | 18.709201000 |
| H | 13.000102000 | -4.424514000 | 18.384508000 |
| C | 12.533037000 | -2.993701000 | 19.934301000 |
| H | 12.026480000 | -3.712616000 | 20.570283000 |

|   |              |              |              |
|---|--------------|--------------|--------------|
| C | 12.643445000 | -1.677915000 | 20.341872000 |
| H | 12.185507000 | -1.361234000 | 21.272581000 |
| C | 13.667489000 | 0.833052000  | 16.893011000 |
| H | 13.082150000 | 0.346387000  | 16.102375000 |
| H | 14.275162000 | 1.626802000  | 16.454284000 |
| H | 12.969623000 | 1.259073000  | 17.610291000 |
| C | 15.387793000 | -0.739040000 | 16.472212000 |
| H | 16.072620000 | -1.476716000 | 16.889357000 |
| H | 15.958195000 | 0.063998000  | 16.006577000 |
| H | 14.770323000 | -1.210963000 | 15.696014000 |
| N | 17.284822000 | 1.898321000  | 20.764891000 |
| C | 18.793060000 | 4.411588000  | 20.861067000 |
| H | 19.814675000 | 4.169652000  | 21.169353000 |
| H | 18.136319000 | 4.069487000  | 21.656660000 |
| C | 18.671388000 | 5.910041000  | 20.743820000 |
| C | 17.538701000 | 6.519466000  | 20.201290000 |
| H | 16.726652000 | 5.904759000  | 19.831668000 |
| C | 17.446193000 | 7.907116000  | 20.122406000 |
| H | 16.562104000 | 8.363926000  | 19.686619000 |
| C | 18.483161000 | 8.705426000  | 20.602785000 |
| H | 18.412903000 | 9.787702000  | 20.541152000 |
| C | 19.611034000 | 8.105736000  | 21.161881000 |
| H | 20.426395000 | 8.719034000  | 21.534942000 |
| C | 19.704472000 | 6.718252000  | 21.224917000 |
| H | 20.599448000 | 6.252203000  | 21.628688000 |
| C | 17.723528000 | 1.982451000  | 22.097008000 |
| C | 16.734891000 | 2.253906000  | 23.081505000 |
| C | 17.066599000 | 2.130957000  | 24.431508000 |
| H | 16.313226000 | 2.328264000  | 25.186879000 |
| C | 18.350439000 | 1.769936000  | 24.826587000 |
| H | 18.592116000 | 1.670274000  | 25.880860000 |
| C | 19.327619000 | 1.564021000  | 23.860736000 |
| H | 20.334366000 | 1.306428000  | 24.173839000 |
| C | 19.047112000 | 1.669769000  | 22.495515000 |
| C | 15.360553000 | 2.754038000  | 22.667613000 |
| H | 15.024701000 | 2.153996000  | 21.811470000 |
| C | 15.461255000 | 4.205125000  | 22.178398000 |
| H | 15.944585000 | 4.836559000  | 22.931371000 |
| H | 14.470468000 | 4.620791000  | 21.976526000 |
| H | 16.041598000 | 4.269116000  | 21.256534000 |
| C | 14.288855000 | 2.640520000  | 23.749446000 |
| H | 14.472185000 | 3.334480000  | 24.576986000 |

|    |              |              |              |
|----|--------------|--------------|--------------|
| H  | 14.219291000 | 1.631515000  | 24.168546000 |
| H  | 13.313034000 | 2.893333000  | 23.325620000 |
| C  | 20.161734000 | 1.430647000  | 21.491151000 |
| H  | 19.891736000 | 1.949274000  | 20.568115000 |
| C  | 20.319664000 | -0.051394000 | 21.144317000 |
| H  | 20.507252000 | -0.648772000 | 22.043094000 |
| H  | 21.161637000 | -0.199019000 | 20.459327000 |
| H  | 19.426554000 | -0.442405000 | 20.655604000 |
| C  | 21.506267000 | 1.995481000  | 21.959322000 |
| H  | 21.428905000 | 3.040608000  | 22.273833000 |
| H  | 22.240483000 | 1.941298000  | 21.150165000 |
| H  | 21.916748000 | 1.423445000  | 22.797998000 |
| N  | 16.051117000 | -1.412731000 | 21.845923000 |
| C  | 17.184813000 | -1.841651000 | 19.294149000 |
| H  | 17.524870000 | -2.167412000 | 18.305800000 |
| H  | 18.092919000 | -1.546432000 | 19.842736000 |
| C  | 16.474021000 | -2.939950000 | 19.987111000 |
| C  | 15.873410000 | -2.729769000 | 21.250682000 |
| C  | 15.183708000 | -3.748010000 | 21.903827000 |
| H  | 14.728978000 | -3.565270000 | 22.872060000 |
| C  | 15.052787000 | -5.005496000 | 21.314387000 |
| H  | 14.507733000 | -5.791332000 | 21.829000000 |
| C  | 15.616562000 | -5.232208000 | 20.061826000 |
| H  | 15.516791000 | -6.203821000 | 19.584886000 |
| C  | 16.307866000 | -4.212497000 | 19.413819000 |
| H  | 16.746645000 | -4.396304000 | 18.435673000 |
| C  | 17.337063000 | -1.389348000 | 22.572208000 |
| H  | 17.303652000 | -2.089506000 | 23.419160000 |
| H  | 17.537312000 | -0.385750000 | 22.947623000 |
| H  | 18.146412000 | -1.695659000 | 21.912266000 |
| C  | 15.001227000 | -1.025775000 | 22.793285000 |
| H  | 14.021164000 | -1.116286000 | 22.326072000 |
| H  | 15.176198000 | 0.008698000  | 23.094107000 |
| H  | 15.015364000 | -1.635230000 | 23.707870000 |
| Al | 11.182722000 | 1.233834000  | 19.870090000 |
| C  | 10.422390000 | 0.649692000  | 21.652822000 |
| H  | 9.942593000  | 1.534299000  | 22.102062000 |
| H  | 11.232592000 | 0.396028000  | 22.355760000 |
| C  | 9.400621000  | -0.491770000 | 21.616696000 |
| H  | 8.532390000  | -0.228255000 | 20.999802000 |
| H  | 9.819972000  | -1.404188000 | 21.174832000 |
| H  | 9.010755000  | -0.765322000 | 22.609107000 |

|   |              |              |              |
|---|--------------|--------------|--------------|
| C | 11.187880000 | 3.231257000  | 19.687234000 |
| H | 11.599317000 | 3.540295000  | 18.715661000 |
| H | 10.144830000 | 3.585365000  | 19.678081000 |
| C | 11.946939000 | 3.930249000  | 20.815793000 |
| H | 11.495190000 | 3.716186000  | 21.792981000 |
| H | 11.987642000 | 5.027196000  | 20.724318000 |
| H | 12.984266000 | 3.578853000  | 20.868743000 |
| C | 10.424512000 | 0.285270000  | 18.260795000 |
| H | 11.129964000 | -0.472548000 | 17.891260000 |
| H | 9.546488000  | -0.293658000 | 18.585918000 |
| C | 10.008459000 | 1.201890000  | 17.104789000 |
| H | 9.244670000  | 1.925169000  | 17.417045000 |
| H | 9.594432000  | 0.657512000  | 16.242268000 |
| H | 10.849842000 | 1.796496000  | 16.725349000 |

**Int-3**

|   |              |              |              |
|---|--------------|--------------|--------------|
| Y | 16.948430000 | -0.269106000 | 19.659548000 |
| N | 18.107397000 | 1.473297000  | 18.602878000 |
| N | 19.042202000 | 3.401767000  | 19.712936000 |
| N | 11.974263000 | -1.258140000 | 18.718425000 |
| C | 18.382046000 | 2.197304000  | 19.704817000 |
| C | 19.559868000 | 3.979400000  | 18.454445000 |
| H | 18.726487000 | 4.297426000  | 17.823128000 |
| H | 20.085738000 | 3.196204000  | 17.913573000 |
| C | 20.493660000 | 5.148573000  | 18.637176000 |
| C | 21.857340000 | 4.947643000  | 18.872335000 |
| H | 22.244745000 | 3.936276000  | 18.929850000 |
| C | 22.722349000 | 6.028885000  | 19.020400000 |
| H | 23.778561000 | 5.853737000  | 19.204260000 |
| C | 22.234505000 | 7.331259000  | 18.920034000 |
| H | 22.907882000 | 8.176160000  | 19.033667000 |
| C | 20.882596000 | 7.543182000  | 18.655625000 |
| H | 20.496108000 | 8.553774000  | 18.559714000 |
| C | 20.020474000 | 6.458890000  | 18.511191000 |
| H | 18.968415000 | 6.628759000  | 18.304820000 |
| C | 18.510395000 | 1.629185000  | 17.250371000 |
| C | 19.676332000 | 0.953714000  | 16.807709000 |
| C | 20.046627000 | 1.035186000  | 15.464297000 |
| H | 20.948967000 | 0.526721000  | 15.135746000 |
| C | 19.288390000 | 1.748410000  | 14.544949000 |
| H | 19.593577000 | 1.806690000  | 13.504085000 |
| C | 18.121981000 | 2.366554000  | 14.972537000 |

|   |              |              |              |
|---|--------------|--------------|--------------|
| H | 17.506101000 | 2.899379000  | 14.253426000 |
| C | 17.706707000 | 2.307108000  | 16.306065000 |
| C | 20.554169000 | 0.151508000  | 17.747455000 |
| H | 20.077283000 | 0.162213000  | 18.729611000 |
| C | 21.940945000 | 0.786707000  | 17.877663000 |
| H | 22.468988000 | 0.786096000  | 16.917792000 |
| H | 22.556249000 | 0.234752000  | 18.595532000 |
| H | 21.874967000 | 1.824109000  | 18.215895000 |
| C | 20.670042000 | -1.313216000 | 17.319333000 |
| H | 21.109901000 | -1.410044000 | 16.320900000 |
| H | 19.691389000 | -1.798012000 | 17.306826000 |
| H | 21.310075000 | -1.863544000 | 18.017861000 |
| C | 16.368042000 | 2.920242000  | 16.659509000 |
| H | 16.218319000 | 2.782063000  | 17.735783000 |
| C | 15.251618000 | 2.175733000  | 15.917821000 |
| H | 15.304432000 | 2.371992000  | 14.841527000 |
| H | 14.264275000 | 2.497355000  | 16.265912000 |
| H | 15.334241000 | 1.095624000  | 16.053937000 |
| C | 16.291606000 | 4.416288000  | 16.341952000 |
| H | 17.062570000 | 4.993720000  | 16.858463000 |
| H | 15.316661000 | 4.819668000  | 16.635691000 |
| H | 16.409447000 | 4.596112000  | 15.268335000 |
| C | 14.340306000 | 0.337544000  | 18.539362000 |
| H | 13.821263000 | 0.560075000  | 17.598752000 |
| H | 15.069526000 | 1.162943000  | 18.587261000 |
| C | 13.383829000 | 0.482404000  | 19.666397000 |
| C | 12.260643000 | -0.369112000 | 19.795554000 |
| C | 11.453158000 | -0.293875000 | 20.932705000 |
| H | 10.611042000 | -0.970202000 | 21.038360000 |
| C | 11.683636000 | 0.667411000  | 21.916786000 |
| H | 11.028810000 | 0.727075000  | 22.781416000 |
| C | 12.722221000 | 1.577328000  | 21.750116000 |
| H | 12.871320000 | 2.375585000  | 22.469020000 |
| C | 13.566873000 | 1.468793000  | 20.645887000 |
| H | 14.382860000 | 2.177468000  | 20.522055000 |
| C | 11.256364000 | -0.574556000 | 17.644890000 |
| H | 10.234350000 | -0.292773000 | 17.951747000 |
| H | 11.191331000 | -1.227981000 | 16.771037000 |
| H | 11.781181000 | 0.337246000  | 17.353475000 |
| C | 11.277650000 | -2.478593000 | 19.087173000 |
| H | 11.795553000 | -2.972563000 | 19.911993000 |
| H | 11.276405000 | -3.156935000 | 18.229223000 |

|   |              |              |              |
|---|--------------|--------------|--------------|
| H | 10.225702000 | -2.312859000 | 19.377440000 |
| N | 17.881308000 | 1.609370000  | 20.826670000 |
| C | 18.874029000 | 4.346801000  | 20.810299000 |
| H | 19.845923000 | 4.793621000  | 21.038376000 |
| H | 18.574705000 | 3.802182000  | 21.704285000 |
| C | 17.878511000 | 5.448429000  | 20.542776000 |
| C | 16.798445000 | 5.275440000  | 19.677173000 |
| H | 16.677678000 | 4.332733000  | 19.154421000 |
| C | 15.877864000 | 6.302790000  | 19.474699000 |
| H | 15.046815000 | 6.153309000  | 18.791759000 |
| C | 16.025527000 | 7.516074000  | 20.143186000 |
| H | 15.310395000 | 8.318084000  | 19.984641000 |
| C | 17.099388000 | 7.694108000  | 21.016046000 |
| H | 17.225465000 | 8.638393000  | 21.538471000 |
| C | 18.020736000 | 6.668911000  | 21.208604000 |
| H | 18.869283000 | 6.818203000  | 21.871701000 |
| C | 18.432277000 | 1.723296000  | 22.123333000 |
| C | 17.556310000 | 1.964592000  | 23.219114000 |
| C | 18.073719000 | 2.064343000  | 24.510753000 |
| H | 17.399367000 | 2.265745000  | 25.335638000 |
| C | 19.430147000 | 1.909531000  | 24.767906000 |
| H | 19.815206000 | 1.996573000  | 25.779813000 |
| C | 20.276849000 | 1.623850000  | 23.709724000 |
| H | 21.336032000 | 1.474306000  | 23.899593000 |
| C | 19.811653000 | 1.513016000  | 22.395274000 |
| C | 16.062452000 | 2.132033000  | 23.014326000 |
| H | 15.758864000 | 1.421751000  | 22.234996000 |
| C | 15.737080000 | 3.534958000  | 22.500054000 |
| H | 16.119462000 | 4.297085000  | 23.187325000 |
| H | 14.657145000 | 3.687220000  | 22.405280000 |
| H | 16.187690000 | 3.709601000  | 21.524032000 |
| C | 15.238395000 | 1.823011000  | 24.266165000 |
| H | 15.329387000 | 2.615817000  | 25.016789000 |
| H | 15.532641000 | 0.881138000  | 24.739647000 |
| H | 14.180225000 | 1.745922000  | 24.007581000 |
| C | 20.846678000 | 1.174342000  | 21.339882000 |
| H | 20.335109000 | 1.040337000  | 20.385673000 |
| C | 21.588818000 | -0.129995000 | 21.657476000 |
| H | 22.228111000 | -0.018962000 | 22.539900000 |
| H | 22.236694000 | -0.409076000 | 20.819648000 |
| H | 20.902773000 | -0.959117000 | 21.841613000 |
| C | 21.860155000 | 2.311840000  | 21.191024000 |

|    |              |              |              |
|----|--------------|--------------|--------------|
| H  | 21.373160000 | 3.248287000  | 20.918749000 |
| H  | 22.602832000 | 2.072491000  | 20.423993000 |
| H  | 22.400685000 | 2.476199000  | 22.129538000 |
| N  | 16.299933000 | -1.680424000 | 21.839833000 |
| C  | 18.704163000 | -1.726468000 | 20.392132000 |
| H  | 19.620292000 | -1.880612000 | 19.820450000 |
| H  | 18.946276000 | -1.144041000 | 21.289067000 |
| C  | 18.014266000 | -2.990256000 | 20.694720000 |
| C  | 16.776616000 | -2.982261000 | 21.389911000 |
| C  | 16.071794000 | -4.159886000 | 21.628723000 |
| H  | 15.126094000 | -4.132823000 | 22.159782000 |
| C  | 16.562908000 | -5.381705000 | 21.169735000 |
| H  | 16.001993000 | -6.293460000 | 21.350997000 |
| C  | 17.765833000 | -5.414064000 | 20.465859000 |
| H  | 18.152586000 | -6.358447000 | 20.092175000 |
| C  | 18.471215000 | -4.238908000 | 20.230224000 |
| H  | 19.408278000 | -4.270019000 | 19.679496000 |
| C  | 16.962063000 | -1.336435000 | 23.112100000 |
| H  | 16.650416000 | -2.034221000 | 23.902209000 |
| H  | 16.697729000 | -0.323648000 | 23.405814000 |
| H  | 18.045300000 | -1.391553000 | 23.007773000 |
| C  | 14.845749000 | -1.593109000 | 22.029142000 |
| H  | 14.325637000 | -1.890905000 | 21.117468000 |
| H  | 14.578451000 | -0.559663000 | 22.261258000 |
| H  | 14.492995000 | -2.221172000 | 22.858702000 |
| Al | 14.821386000 | -1.501961000 | 17.558336000 |
| C  | 13.987705000 | -1.354201000 | 15.732326000 |
| H  | 14.736920000 | -1.030635000 | 14.997425000 |
| H  | 13.232335000 | -0.556151000 | 15.728948000 |
| C  | 13.342904000 | -2.654104000 | 15.240103000 |
| H  | 14.085042000 | -3.453978000 | 15.129184000 |
| H  | 12.593126000 | -3.030083000 | 15.947613000 |
| H  | 12.840840000 | -2.551975000 | 14.266595000 |
| C  | 16.912515000 | -1.426057000 | 17.324565000 |
| H  | 17.469974000 | -0.474254000 | 17.340491000 |
| H  | 17.433834000 | -2.105451000 | 18.025933000 |
| C  | 17.173631000 | -1.980326000 | 15.915391000 |
| H  | 16.587798000 | -2.883029000 | 15.713519000 |
| H  | 18.228614000 | -2.234936000 | 15.753205000 |
| H  | 16.902378000 | -1.242388000 | 15.155736000 |
| C  | 14.540866000 | -3.276137000 | 18.452687000 |
| H  | 14.623868000 | -3.231265000 | 19.545934000 |



|   |              |              |              |
|---|--------------|--------------|--------------|
| H | 13.500015000 | -3.562899000 | 18.259765000 |
| C | 15.461205000 | -4.391224000 | 17.945177000 |
| H | 15.344235000 | -4.548642000 | 16.865529000 |
| H | 15.265754000 | -5.358526000 | 18.428083000 |
| H | 16.517865000 | -4.166630000 | 18.123957000 |

**TS-2**

|   |              |              |              |
|---|--------------|--------------|--------------|
| Y | 18.001531000 | 0.233481000  | 19.478749000 |
| N | 19.466411000 | 1.894633000  | 18.695310000 |
| N | 20.236592000 | 3.747396000  | 19.999413000 |
| N | 11.197223000 | -0.747708000 | 16.960914000 |
| C | 19.426672000 | 2.661290000  | 19.807543000 |
| C | 21.487132000 | 3.919077000  | 19.259776000 |
| H | 21.595800000 | 4.982821000  | 19.029402000 |
| H | 21.419095000 | 3.395052000  | 18.309177000 |
| C | 22.682367000 | 3.422455000  | 20.036886000 |
| C | 22.848947000 | 2.050069000  | 20.257184000 |
| H | 22.113811000 | 1.355170000  | 19.863338000 |
| C | 23.947610000 | 1.573991000  | 20.965588000 |
| H | 24.071929000 | 0.505140000  | 21.113563000 |
| C | 24.891859000 | 2.466632000  | 21.476588000 |
| H | 25.748796000 | 2.095019000  | 22.031082000 |
| C | 24.732545000 | 3.834436000  | 21.267299000 |
| H | 25.464099000 | 4.535303000  | 21.659443000 |
| C | 23.634673000 | 4.306485000  | 20.547144000 |
| H | 23.522055000 | 5.372113000  | 20.365319000 |
| C | 19.795800000 | 2.292406000  | 17.385771000 |
| C | 20.679520000 | 1.477981000  | 16.638128000 |
| C | 20.945159000 | 1.801063000  | 15.304454000 |
| H | 21.628033000 | 1.175029000  | 14.735978000 |
| C | 20.364230000 | 2.906694000  | 14.700880000 |
| H | 20.586646000 | 3.151215000  | 13.666042000 |
| C | 19.486894000 | 3.699217000  | 15.435680000 |
| H | 19.024285000 | 4.555116000  | 14.956280000 |
| C | 19.175265000 | 3.411308000  | 16.764765000 |
| C | 21.367739000 | 0.271832000  | 17.247309000 |
| H | 21.058786000 | 0.216330000  | 18.296300000 |
| C | 22.893069000 | 0.415523000  | 17.202239000 |
| H | 23.264405000 | 0.385321000  | 16.172005000 |
| H | 23.374969000 | -0.401525000 | 17.751101000 |
| H | 23.222949000 | 1.358560000  | 17.646126000 |
| C | 20.935451000 | -1.028338000 | 16.560869000 |

|   |              |              |              |
|---|--------------|--------------|--------------|
| H | 21.200152000 | -1.019120000 | 15.497642000 |
| H | 19.854315000 | -1.184043000 | 16.627864000 |
| H | 21.430009000 | -1.892223000 | 17.018172000 |
| C | 18.133055000 | 4.235105000  | 17.500395000 |
| H | 18.491615000 | 4.396651000  | 18.518603000 |
| C | 16.812154000 | 3.466891000  | 17.581955000 |
| H | 16.408834000 | 3.281260000  | 16.582625000 |
| H | 16.060822000 | 4.029018000  | 18.145806000 |
| H | 16.942046000 | 2.498776000  | 18.072405000 |
| C | 17.890348000 | 5.617690000  | 16.900041000 |
| H | 18.815163000 | 6.196872000  | 16.819875000 |
| H | 17.200045000 | 6.179435000  | 17.535763000 |
| H | 17.430608000 | 5.558696000  | 15.907403000 |
| C | 13.043124000 | -0.574540000 | 19.054366000 |
| H | 13.697176000 | -0.206576000 | 19.852957000 |
| H | 12.999794000 | -1.665605000 | 19.174505000 |
| C | 11.707750000 | 0.070142000  | 19.182487000 |
| C | 10.785884000 | -0.003244000 | 18.111013000 |
| C | 9.573753000  | 0.686456000  | 18.167636000 |
| H | 8.876659000  | 0.626452000  | 17.337698000 |
| C | 9.254531000  | 1.471431000  | 19.276265000 |
| H | 8.310857000  | 2.009300000  | 19.303256000 |
| C | 10.150804000 | 1.559824000  | 20.337253000 |
| H | 9.916868000  | 2.173388000  | 21.203437000 |
| C | 11.356215000 | 0.861104000  | 20.283309000 |
| H | 12.061742000 | 0.939227000  | 21.107618000 |
| C | 10.542587000 | -0.393435000 | 15.709915000 |
| H | 9.504338000  | -0.760132000 | 15.651392000 |
| H | 10.542334000 | 0.687509000  | 15.576012000 |
| C | 11.105513000 | -2.195880000 | 17.154907000 |
| H | 11.591017000 | -2.494519000 | 18.083152000 |
| H | 11.602725000 | -2.704634000 | 16.325060000 |
| H | 10.055247000 | -2.527001000 | 17.194018000 |
| N | 18.500901000 | 2.219300000  | 20.676052000 |
| C | 20.070429000 | 4.679622000  | 21.112808000 |
| H | 20.958257000 | 4.622405000  | 21.752951000 |
| H | 19.220829000 | 4.363736000  | 21.712328000 |
| C | 19.858342000 | 6.104605000  | 20.666315000 |
| C | 18.612454000 | 6.512768000  | 20.180303000 |
| H | 17.801275000 | 5.793399000  | 20.126231000 |
| C | 18.401950000 | 7.829819000  | 19.783065000 |
| H | 17.426425000 | 8.134301000  | 19.415186000 |

|   |              |              |              |
|---|--------------|--------------|--------------|
| C | 19.439394000 | 8.759036000  | 19.866314000 |
| H | 19.276144000 | 9.787241000  | 19.556400000 |
| C | 20.681840000 | 8.365488000  | 20.358383000 |
| H | 21.491125000 | 9.086213000  | 20.435160000 |
| C | 20.885896000 | 7.045947000  | 20.760533000 |
| H | 21.848270000 | 6.743235000  | 21.164948000 |
| C | 18.262746000 | 2.465074000  | 22.041924000 |
| C | 16.981300000 | 2.969357000  | 22.378985000 |
| C | 16.570610000 | 2.944259000  | 23.713625000 |
| H | 15.580337000 | 3.309014000  | 23.972670000 |
| C | 17.413878000 | 2.472080000  | 24.714585000 |
| H | 17.078258000 | 2.443946000  | 25.747320000 |
| C | 18.711689000 | 2.090004000  | 24.388351000 |
| H | 19.393759000 | 1.787308000  | 25.178212000 |
| C | 19.168994000 | 2.101374000  | 23.067521000 |
| C | 16.098408000 | 3.593660000  | 21.312887000 |
| H | 16.733328000 | 3.733191000  | 20.431754000 |
| C | 15.582038000 | 4.969322000  | 21.747436000 |
| H | 14.843156000 | 4.891491000  | 22.552382000 |
| H | 15.089949000 | 5.471633000  | 20.907334000 |
| H | 16.393380000 | 5.612562000  | 22.101458000 |
| C | 14.929859000 | 2.698431000  | 20.894294000 |
| H | 14.313545000 | 2.423475000  | 21.757242000 |
| H | 15.272475000 | 1.773853000  | 20.424298000 |
| H | 14.283978000 | 3.206864000  | 20.171538000 |
| C | 20.625744000 | 1.799972000  | 22.772244000 |
| H | 20.833223000 | 2.148731000  | 21.760347000 |
| C | 20.953477000 | 0.308204000  | 22.802642000 |
| H | 20.692392000 | -0.139325000 | 23.767839000 |
| H | 22.024178000 | 0.152237000  | 22.636584000 |
| H | 20.414099000 | -0.227956000 | 22.019780000 |
| C | 21.565727000 | 2.568210000  | 23.706491000 |
| H | 21.294316000 | 3.625726000  | 23.774648000 |
| H | 22.592942000 | 2.501695000  | 23.335169000 |
| H | 21.553883000 | 2.157855000  | 24.722241000 |
| N | 17.199151000 | -1.131480000 | 21.541994000 |
| C | 19.358669000 | -1.776438000 | 19.806597000 |
| H | 20.087225000 | -2.120782000 | 19.070857000 |
| H | 19.847689000 | -1.660406000 | 20.775527000 |
| C | 18.139717000 | -2.587507000 | 19.810926000 |
| C | 17.036782000 | -2.268394000 | 20.656651000 |
| C | 15.827388000 | -2.962286000 | 20.565755000 |

|    |              |              |              |
|----|--------------|--------------|--------------|
| H  | 15.001112000 | -2.700619000 | 21.217075000 |
| C  | 15.656794000 | -3.968437000 | 19.621690000 |
| H  | 14.708390000 | -4.491192000 | 19.550783000 |
| C  | 16.708894000 | -4.279169000 | 18.756839000 |
| H  | 16.581224000 | -5.049253000 | 18.001312000 |
| C  | 17.915212000 | -3.602152000 | 18.851678000 |
| H  | 18.728926000 | -3.850151000 | 18.174592000 |
| C  | 17.996209000 | -1.456922000 | 22.734620000 |
| H  | 17.431946000 | -2.135318000 | 23.390436000 |
| H  | 18.221338000 | -0.537856000 | 23.279718000 |
| H  | 18.926265000 | -1.948213000 | 22.454196000 |
| C  | 15.944158000 | -0.515143000 | 21.987111000 |
| H  | 15.290843000 | -0.322596000 | 21.134515000 |
| H  | 16.179057000 | 0.427817000  | 22.485465000 |
| H  | 15.397525000 | -1.149664000 | 22.699167000 |
| Al | 13.811788000 | -0.155906000 | 17.222761000 |
| C  | 14.147234000 | -1.489382000 | 15.766745000 |
| H  | 14.896977000 | -1.054392000 | 15.088089000 |
| H  | 13.246956000 | -1.603057000 | 15.145775000 |
| C  | 14.629912000 | -2.866108000 | 16.227456000 |
| H  | 15.541093000 | -2.790774000 | 16.830669000 |
| H  | 13.889311000 | -3.364996000 | 16.864328000 |
| H  | 14.851937000 | -3.556259000 | 15.398877000 |
| C  | 13.734654000 | 1.790606000  | 16.733680000 |
| H  | 13.915503000 | 2.345053000  | 17.668894000 |
| H  | 14.634174000 | 1.971531000  | 16.124650000 |
| C  | 12.538010000 | 2.421571000  | 16.022194000 |
| H  | 12.340548000 | 1.936899000  | 15.058603000 |
| H  | 12.681776000 | 3.492147000  | 15.809910000 |
| H  | 11.624419000 | 2.339992000  | 16.621792000 |
| C  | 15.984899000 | -0.070077000 | 18.094597000 |
| H  | 15.524836000 | 0.861731000  | 18.414450000 |
| H  | 15.687153000 | -1.001590000 | 18.571002000 |
| C  | 16.924606000 | -0.095871000 | 16.917482000 |
| H  | 16.864966000 | -1.040823000 | 16.371798000 |
| H  | 18.026426000 | 0.008752000  | 17.128488000 |
| H  | 16.737322000 | 0.713626000  | 16.206372000 |
| H  | 11.101993000 | -0.843997000 | 14.884726000 |

#### Int-4

|   |             |              |              |
|---|-------------|--------------|--------------|
| Y | 0.562308000 | -1.377071000 | 0.087234000  |
| N | 2.009086000 | 0.300693000  | -0.739357000 |

|   |              |              |              |
|---|--------------|--------------|--------------|
| N | 2.653864000  | 2.257139000  | 0.489071000  |
| N | -6.506408000 | -2.018740000 | -2.371317000 |
| C | 1.901423000  | 1.121466000  | 0.327303000  |
| C | 3.923597000  | 2.447735000  | -0.209512000 |
| H | 3.985649000  | 3.495108000  | -0.519440000 |
| H | 3.927343000  | 1.848861000  | -1.117681000 |
| C | 5.111610000  | 2.084857000  | 0.648853000  |
| C | 5.305089000  | 0.757751000  | 1.049639000  |
| H | 4.596986000  | -0.002420000 | 0.734540000  |
| C | 6.400923000  | 0.406111000  | 1.832364000  |
| H | 6.545839000  | -0.630246000 | 2.123952000  |
| C | 7.316706000  | 1.380758000  | 2.233048000  |
| H | 8.171703000  | 1.107110000  | 2.844669000  |
| C | 7.132458000  | 2.703930000  | 1.839047000  |
| H | 7.842191000  | 3.467605000  | 2.144697000  |
| C | 6.035878000  | 3.051075000  | 1.049223000  |
| H | 5.898043000  | 4.081349000  | 0.731658000  |
| C | 2.421151000  | 0.615499000  | -2.045450000 |
| C | 3.382073000  | -0.221440000 | -2.663864000 |
| C | 3.731024000  | 0.004617000  | -3.997711000 |
| H | 4.472526000  | -0.637848000 | -4.465550000 |
| C | 3.159380000  | 1.037186000  | -4.727227000 |
| H | 3.444228000  | 1.205436000  | -5.762042000 |
| C | 2.214598000  | 1.857199000  | -4.117489000 |
| H | 1.764663000  | 2.659438000  | -4.693087000 |
| C | 1.820900000  | 1.666012000  | -2.792287000 |
| C | 4.066197000  | -1.344943000 | -1.909835000 |
| H | 3.675595000  | -1.334270000 | -0.886774000 |
| C | 5.582414000  | -1.131973000 | -1.845573000 |
| H | 6.038767000  | -1.224629000 | -2.837652000 |
| H | 6.051571000  | -1.879618000 | -1.195875000 |
| H | 5.834894000  | -0.142478000 | -1.455276000 |
| C | 3.745782000  | -2.711829000 | -2.522955000 |
| H | 4.116628000  | -2.778037000 | -3.552041000 |
| H | 2.668679000  | -2.900512000 | -2.551796000 |
| H | 4.217151000  | -3.516043000 | -1.947644000 |
| C | 0.719194000  | 2.525452000  | -2.197960000 |
| H | 0.953063000  | 2.687888000  | -1.143863000 |
| C | -0.625129000 | 1.795106000  | -2.268576000 |
| H | -0.905300000 | 1.597429000  | -3.308857000 |
| H | -1.418599000 | 2.398018000  | -1.813722000 |
| H | -0.591497000 | 0.835880000  | -1.748649000 |

|   |              |              |              |
|---|--------------|--------------|--------------|
| C | 0.601811000  | 3.908621000  | -2.835154000 |
| H | 1.553112000  | 4.448923000  | -2.815470000 |
| H | -0.134266000 | 4.506208000  | -2.289048000 |
| H | 0.256669000  | 3.854818000  | -3.873382000 |
| C | -4.495019000 | -2.240555000 | -0.505787000 |
| H | -3.723304000 | -1.890949000 | 0.183502000  |
| H | -4.399603000 | -3.334169000 | -0.552530000 |
| C | -5.854517000 | -1.829349000 | -0.040462000 |
| C | -6.881773000 | -1.701481000 | -0.999006000 |
| C | -8.156587000 | -1.262558000 | -0.654004000 |
| H | -8.931217000 | -1.171466000 | -1.408786000 |
| C | -8.432067000 | -0.912202000 | 0.667447000  |
| H | -9.422862000 | -0.558762000 | 0.937478000  |
| C | -7.430133000 | -1.010887000 | 1.630800000  |
| H | -7.636556000 | -0.729546000 | 2.660012000  |
| C | -6.162040000 | -1.467988000 | 1.277590000  |
| H | -5.382295000 | -1.539007000 | 2.032254000  |
| C | -7.232380000 | -1.259960000 | -3.399432000 |
| H | -8.279378000 | -1.576324000 | -3.484523000 |
| H | -7.192543000 | -0.195429000 | -3.168843000 |
| C | -6.659583000 | -3.466180000 | -2.627877000 |
| H | -6.071193000 | -4.032174000 | -1.904910000 |
| H | -6.301407000 | -3.693390000 | -3.633786000 |
| H | -7.712201000 | -3.763274000 | -2.540096000 |
| N | 0.979852000  | 0.677477000  | 1.193324000  |
| C | 2.422325000  | 3.211756000  | 1.571947000  |
| H | 3.251512000  | 3.154779000  | 2.287966000  |
| H | 1.518791000  | 2.925488000  | 2.103380000  |
| C | 2.274477000  | 4.629516000  | 1.080735000  |
| C | 1.110624000  | 5.026946000  | 0.415862000  |
| H | 0.314130000  | 4.305405000  | 0.260174000  |
| C | 0.963873000  | 6.334898000  | -0.035979000 |
| H | 0.052601000  | 6.630778000  | -0.547634000 |
| C | 1.982215000  | 7.265634000  | 0.173598000  |
| H | 1.868339000  | 8.286654000  | -0.179335000 |
| C | 3.140329000  | 6.882974000  | 0.846860000  |
| H | 3.933352000  | 7.604649000  | 1.021829000  |
| C | 3.282378000  | 5.571294000  | 1.298819000  |
| H | 4.179572000  | 5.272079000  | 1.834255000  |
| C | 0.628384000  | 1.027852000  | 2.505679000  |
| C | -0.668939000 | 1.565072000  | 2.691315000  |
| C | -1.180942000 | 1.663159000  | 3.986493000  |

|   |              |              |              |
|---|--------------|--------------|--------------|
| H | -2.180631000 | 2.060252000  | 4.138447000  |
| C | -0.421849000 | 1.271207000  | 5.086216000  |
| H | -0.836162000 | 1.338186000  | 6.088293000  |
| C | 0.891417000  | 0.847299000  | 4.899562000  |
| H | 1.503746000  | 0.611522000  | 5.765415000  |
| C | 1.448147000  | 0.743237000  | 3.622011000  |
| C | -1.443657000 | 2.062786000  | 1.485365000  |
| H | -0.696149000 | 2.282316000  | 0.713676000  |
| C | -2.216576000 | 3.351458000  | 1.770954000  |
| H | -3.065608000 | 3.179979000  | 2.441797000  |
| H | -2.623652000 | 3.758778000  | 0.839256000  |
| H | -1.576943000 | 4.114662000  | 2.225653000  |
| C | -2.373172000 | 0.999097000  | 0.899983000  |
| H | -3.120956000 | 0.680905000  | 1.634063000  |
| H | -1.820634000 | 0.114641000  | 0.568607000  |
| H | -2.900575000 | 1.385688000  | 0.024636000  |
| C | 2.913512000  | 0.402776000  | 3.434028000  |
| H | 3.207197000  | 0.796629000  | 2.458905000  |
| C | 3.178674000  | -1.101285000 | 3.396278000  |
| H | 2.898869000  | -1.578316000 | 4.341782000  |
| H | 4.241990000  | -1.298124000 | 3.222000000  |
| H | 2.615115000  | -1.580986000 | 2.592599000  |
| C | 3.809713000  | 1.082578000  | 4.470125000  |
| H | 3.586689000  | 2.150728000  | 4.556572000  |
| H | 4.859012000  | 0.978847000  | 4.177636000  |
| H | 3.699502000  | 0.636245000  | 5.464717000  |
| N | -0.430289000 | -2.645579000 | 2.162909000  |
| C | 1.808342000  | -3.465621000 | 0.576220000  |
| H | 2.561692000  | -3.872369000 | -0.100299000 |
| H | 2.223308000  | -3.358712000 | 1.578490000  |
| C | 0.522485000  | -4.142684000 | 0.466334000  |
| C | -0.614885000 | -3.740297000 | 1.231927000  |
| C | -1.875128000 | -4.300025000 | 1.002823000  |
| H | -2.723980000 | -3.981268000 | 1.596555000  |
| C | -2.070174000 | -5.228364000 | -0.012425000 |
| H | -3.058769000 | -5.639229000 | -0.191145000 |
| C | -0.984637000 | -5.607464000 | -0.806895000 |
| H | -1.124483000 | -6.317668000 | -1.617281000 |
| C | 0.273510000  | -5.082295000 | -0.564344000 |
| H | 1.113183000  | -5.384150000 | -1.185774000 |
| C | 0.286740000  | -3.035450000 | 3.385327000  |
| H | -0.345934000 | -3.689644000 | 4.002605000  |

|    |              |              |              |
|----|--------------|--------------|--------------|
| H  | 0.533670000  | -2.137976000 | 3.956587000  |
| H  | 1.202810000  | -3.572687000 | 3.146076000  |
| C  | -1.661684000 | -1.962939000 | 2.557922000  |
| H  | -2.251681000 | -1.707988000 | 1.677191000  |
| H  | -1.398510000 | -1.045395000 | 3.088989000  |
| H  | -2.283481000 | -2.579842000 | 3.223666000  |
| Al | -4.401015000 | -1.519094000 | -2.377524000 |
| C  | -3.717129000 | -2.549717000 | -3.936062000 |
| H  | -2.896825000 | -1.960993000 | -4.372265000 |
| H  | -4.488528000 | -2.563467000 | -4.723436000 |
| C  | -3.226527000 | -3.976591000 | -3.671109000 |
| H  | -2.430104000 | -3.987821000 | -2.920194000 |
| H  | -4.025339000 | -4.621373000 | -3.283954000 |
| H  | -2.830738000 | -4.470437000 | -4.570466000 |
| C  | -4.434944000 | 0.469005000  | -2.548892000 |
| H  | -3.387555000 | 0.800867000  | -2.486722000 |
| H  | -4.742565000 | 0.744850000  | -3.569740000 |
| C  | -5.265697000 | 1.260590000  | -1.531937000 |
| H  | -6.341119000 | 1.081576000  | -1.645931000 |
| H  | -5.117252000 | 2.347804000  | -1.610628000 |
| H  | -5.029018000 | 0.977269000  | -0.501131000 |
| C  | -1.190298000 | -1.672610000 | -1.539114000 |
| H  | -1.909298000 | -0.863540000 | -1.726451000 |
| H  | -1.766872000 | -2.576217000 | -1.297764000 |
| C  | -0.324456000 | -1.921279000 | -2.777767000 |
| H  | -0.866803000 | -2.307571000 | -3.653468000 |
| H  | 0.459308000  | -2.673194000 | -2.582724000 |
| H  | 0.193689000  | -1.012255000 | -3.112881000 |
| H  | -6.743484000 | -1.431073000 | -4.361782000 |

### Int-5

|   |              |              |              |
|---|--------------|--------------|--------------|
| Y | 0.953824000  | 0.055643000  | -0.852322000 |
| N | -1.051817000 | -1.018871000 | -0.147692000 |
| N | -3.103426000 | 0.195249000  | 0.252832000  |
| N | 2.450102000  | -1.960106000 | -0.191505000 |
| C | -1.800064000 | 0.094344000  | -0.176594000 |
| C | -3.865488000 | -0.966608000 | 0.706395000  |
| H | -3.800874000 | -1.059098000 | 1.795848000  |
| H | -3.417332000 | -1.862093000 | 0.281121000  |
| C | -5.319693000 | -0.913420000 | 0.312374000  |
| C | -5.699651000 | -0.762028000 | -1.023805000 |
| H | -4.934620000 | -0.652210000 | -1.783345000 |



|   |              |              |              |
|---|--------------|--------------|--------------|
| C | -7.044478000 | -0.746990000 | -1.380926000 |
| H | -7.323879000 | -0.626906000 | -2.423943000 |
| C | -8.030133000 | -0.891285000 | -0.403559000 |
| H | -9.080206000 | -0.880507000 | -0.681496000 |
| C | -7.660517000 | -1.048985000 | 0.930427000  |
| H | -8.421504000 | -1.161305000 | 1.697689000  |
| C | -6.311723000 | -1.056462000 | 1.284816000  |
| H | -6.022849000 | -1.173412000 | 2.326341000  |
| C | -1.229142000 | -2.273361000 | 0.462605000  |
| C | -1.243299000 | -3.403367000 | -0.397485000 |
| C | -1.237835000 | -4.682752000 | 0.161141000  |
| H | -1.246887000 | -5.550238000 | -0.490772000 |
| C | -1.218377000 | -4.865476000 | 1.540325000  |
| H | -1.205488000 | -5.867293000 | 1.959954000  |
| C | -1.236166000 | -3.755544000 | 2.376289000  |
| H | -1.244397000 | -3.899134000 | 3.452548000  |
| C | -1.252497000 | -2.454334000 | 1.865553000  |
| C | -1.312359000 | -3.207584000 | -1.902521000 |
| H | -0.663410000 | -2.357843000 | -2.148670000 |
| C | -2.733626000 | -2.813141000 | -2.319100000 |
| H | -3.455835000 | -3.580628000 | -2.020170000 |
| H | -2.801796000 | -2.687987000 | -3.404602000 |
| H | -3.026791000 | -1.870355000 | -1.855085000 |
| C | -0.840640000 | -4.409044000 | -2.718529000 |
| H | -1.535287000 | -5.252711000 | -2.640123000 |
| H | 0.149068000  | -4.760230000 | -2.410317000 |
| H | -0.784221000 | -4.136436000 | -3.777231000 |
| C | -1.303329000 | -1.275154000 | 2.815946000  |
| H | -1.720082000 | -0.428539000 | 2.269175000  |
| C | 0.091870000  | -0.856194000 | 3.278172000  |
| H | 0.598980000  | -1.673658000 | 3.802363000  |
| H | 0.029080000  | -0.001846000 | 3.960614000  |
| H | 0.710737000  | -0.560148000 | 2.429756000  |
| C | -2.211980000 | -1.514576000 | 4.022973000  |
| H | -3.191164000 | -1.903435000 | 3.726316000  |
| H | -2.368531000 | -0.573499000 | 4.557119000  |
| H | -1.773563000 | -2.225303000 | 4.732313000  |
| C | 2.653943000  | 0.678175000  | 0.868501000  |
| H | 2.841522000  | 1.698635000  | 1.202954000  |
| H | 2.374009000  | 0.041523000  | 1.704293000  |
| C | 3.655582000  | 0.165368000  | -0.034928000 |
| C | 3.569639000  | -1.144459000 | -0.603746000 |

|   |              |              |              |
|---|--------------|--------------|--------------|
| C | 4.442764000  | -1.548591000 | -1.614538000 |
| H | 4.355700000  | -2.545851000 | -2.031009000 |
| C | 5.410330000  | -0.688420000 | -2.126496000 |
| H | 6.074526000  | -1.020990000 | -2.916424000 |
| C | 5.509749000  | 0.603824000  | -1.607839000 |
| H | 6.238016000  | 1.301986000  | -2.010026000 |
| C | 4.666791000  | 1.012971000  | -0.572542000 |
| H | 4.699104000  | 2.042669000  | -0.226954000 |
| C | 2.588802000  | -2.517191000 | 1.164316000  |
| H | 3.323160000  | -3.334564000 | 1.164029000  |
| H | 1.621556000  | -2.903992000 | 1.493932000  |
| H | 2.932203000  | -1.756599000 | 1.862857000  |
| C | 2.104051000  | -3.046603000 | -1.108626000 |
| H | 1.943750000  | -2.663007000 | -2.118727000 |
| H | 1.185222000  | -3.508436000 | -0.745161000 |
| H | 2.880845000  | -3.823485000 | -1.147003000 |
| N | -1.110498000 | 1.138677000  | -0.692896000 |
| C | -3.651710000 | 1.476644000  | 0.710072000  |
| H | -4.707576000 | 1.502166000  | 0.429626000  |
| H | -3.162289000 | 2.286507000  | 0.175515000  |
| C | -3.503220000 | 1.683521000  | 2.197612000  |
| C | -2.247068000 | 1.976909000  | 2.740693000  |
| H | -1.386304000 | 2.039221000  | 2.082480000  |
| C | -2.096926000 | 2.191348000  | 4.107529000  |
| H | -1.117935000 | 2.432291000  | 4.511917000  |
| C | -3.204190000 | 2.105873000  | 4.953909000  |
| H | -3.089177000 | 2.275842000  | 6.020579000  |
| C | -4.456577000 | 1.803231000  | 4.424022000  |
| H | -5.321887000 | 1.732960000  | 5.077190000  |
| C | -4.603486000 | 1.594950000  | 3.052219000  |
| H | -5.581800000 | 1.369558000  | 2.636047000  |
| C | -1.604452000 | 2.298937000  | -1.312279000 |
| C | -1.084314000 | 3.548432000  | -0.892911000 |
| C | -1.528589000 | 4.719054000  | -1.512348000 |
| H | -1.133686000 | 5.675739000  | -1.181654000 |
| C | -2.462401000 | 4.679749000  | -2.538437000 |
| H | -2.810027000 | 5.598300000  | -3.002638000 |
| C | -2.935437000 | 3.447824000  | -2.980529000 |
| H | -3.640830000 | 3.418701000  | -3.804582000 |
| C | -2.511715000 | 2.249439000  | -2.404598000 |
| C | -0.018039000 | 3.637357000  | 0.180593000  |
| H | 0.037230000  | 2.655936000  | 0.663974000  |

|    |              |              |              |
|----|--------------|--------------|--------------|
| C  | -0.335418000 | 4.672301000  | 1.262115000  |
| H  | -0.306465000 | 5.693534000  | 0.867211000  |
| H  | 0.403005000  | 4.615682000  | 2.069582000  |
| H  | -1.325747000 | 4.509706000  | 1.696780000  |
| C  | 1.349154000  | 3.926836000  | -0.453787000 |
| H  | 1.340996000  | 4.898566000  | -0.959920000 |
| H  | 1.620640000  | 3.181275000  | -1.210972000 |
| H  | 2.140191000  | 3.944501000  | 0.303005000  |
| C  | -2.940470000 | 0.923687000  | -3.005085000 |
| H  | -3.063961000 | 0.211562000  | -2.186734000 |
| C  | -1.835665000 | 0.386710000  | -3.921085000 |
| H  | -1.652356000 | 1.078612000  | -4.750689000 |
| H  | -2.115661000 | -0.583718000 | -4.343633000 |
| H  | -0.893754000 | 0.266585000  | -3.381909000 |
| C  | -4.268619000 | 0.979805000  | -3.758440000 |
| H  | -5.066238000 | 1.418244000  | -3.150758000 |
| H  | -4.576169000 | -0.031719000 | -4.045692000 |
| H  | -4.188561000 | 1.558722000  | -4.684816000 |
| Al | 6.718156000  | 0.515559000  | 0.988964000  |
| C  | 6.952154000  | 2.466901000  | 1.310601000  |
| H  | 7.723508000  | 2.554110000  | 2.093777000  |
| H  | 6.043875000  | 2.892435000  | 1.761973000  |
| C  | 7.379123000  | 3.303179000  | 0.099868000  |
| H  | 8.287967000  | 2.903872000  | -0.366944000 |
| H  | 6.605958000  | 3.317528000  | -0.679261000 |
| H  | 7.585476000  | 4.352847000  | 0.352059000  |
| C  | 5.760357000  | -0.564768000 | 2.353508000  |
| H  | 4.823872000  | -0.070355000 | 2.642345000  |
| H  | 5.473577000  | -1.533823000 | 1.923372000  |
| C  | 6.635141000  | -0.786563000 | 3.596191000  |
| H  | 7.573994000  | -1.299225000 | 3.349919000  |
| H  | 6.138930000  | -1.392781000 | 4.367668000  |
| H  | 6.910383000  | 0.163208000  | 4.072629000  |
| C  | 8.195142000  | -0.409050000 | 0.023719000  |
| H  | 8.347190000  | 0.019027000  | -0.976152000 |
| H  | 9.118316000  | -0.164774000 | 0.575531000  |
| C  | 8.053927000  | -1.930589000 | -0.073857000 |
| H  | 7.966784000  | -2.390749000 | 0.917979000  |
| H  | 8.906358000  | -2.410735000 | -0.575415000 |
| H  | 7.152741000  | -2.213127000 | -0.630297000 |
| C  | 1.698271000  | 0.261629000  | -3.144719000 |
| H  | 1.151183000  | 1.139946000  | -3.536350000 |

|   |             |              |              |
|---|-------------|--------------|--------------|
| H | 2.741400000 | 0.613690000  | -3.040174000 |
| C | 1.670258000 | -0.841656000 | -4.205881000 |
| H | 0.669343000 | -1.279503000 | -4.327568000 |
| H | 2.343093000 | -1.667996000 | -3.938997000 |
| H | 1.983435000 | -0.511245000 | -5.209083000 |

**TS-3**

|   |              |              |              |
|---|--------------|--------------|--------------|
| Y | -0.988183000 | -0.115083000 | 1.084796000  |
| N | 0.915501000  | -1.033393000 | 0.004994000  |
| N | 2.976942000  | 0.188188000  | -0.300772000 |
| N | -2.616541000 | -1.924523000 | 0.135634000  |
| C | 1.696535000  | 0.043163000  | 0.180248000  |
| C | 3.670344000  | -0.890706000 | -1.004606000 |
| H | 3.529576000  | -0.789744000 | -2.086641000 |
| H | 3.225169000  | -1.838531000 | -0.709934000 |
| C | 5.147399000  | -0.927617000 | -0.705323000 |
| C | 5.608666000  | -1.080064000 | 0.604997000  |
| H | 4.891399000  | -1.156922000 | 1.413640000  |
| C | 6.972652000  | -1.124875000 | 0.876325000  |
| H | 7.315112000  | -1.239300000 | 1.901004000  |
| C | 7.896716000  | -1.024717000 | -0.164516000 |
| H | 8.961745000  | -1.058301000 | 0.046713000  |
| C | 7.446398000  | -0.882727000 | -1.475264000 |
| H | 8.159602000  | -0.806494000 | -2.291298000 |
| C | 6.078267000  | -0.832219000 | -1.741889000 |
| H | 5.725971000  | -0.713985000 | -2.763536000 |
| C | 1.017726000  | -2.164091000 | -0.821309000 |
| C | 1.042220000  | -3.427353000 | -0.173328000 |
| C | 0.978710000  | -4.587626000 | -0.947014000 |
| H | 0.997452000  | -5.556736000 | -0.459139000 |
| C | 0.890146000  | -4.523446000 | -2.334100000 |
| H | 0.835613000  | -5.435660000 | -2.921474000 |
| C | 0.888377000  | -3.283650000 | -2.962769000 |
| H | 0.837880000  | -3.237089000 | -4.046460000 |
| C | 0.957554000  | -2.093297000 | -2.233349000 |
| C | 1.188737000  | -3.503604000 | 1.337735000  |
| H | 0.565098000  | -2.710672000 | 1.770677000  |
| C | 2.633870000  | -3.197756000 | 1.746519000  |
| H | 3.326897000  | -3.911045000 | 1.287180000  |
| H | 2.754114000  | -3.258508000 | 2.833153000  |
| H | 2.924401000  | -2.193613000 | 1.434048000  |
| C | 0.743489000  | -4.830340000 | 1.948995000  |

|   |              |              |              |
|---|--------------|--------------|--------------|
| H | 1.420993000  | -5.649055000 | 1.682550000  |
| H | -0.265831000 | -5.117033000 | 1.637514000  |
| H | 0.745915000  | -4.753687000 | 3.040928000  |
| C | 0.968463000  | -0.760852000 | -2.956411000 |
| H | 1.462175000  | -0.035726000 | -2.307555000 |
| C | -0.447139000 | -0.235375000 | -3.196542000 |
| H | -1.032208000 | -0.929238000 | -3.809686000 |
| H | -0.415889000 | 0.729885000  | -3.712852000 |
| H | -0.973382000 | -0.089031000 | -2.251786000 |
| C | 1.755406000  | -0.791686000 | -4.267198000 |
| H | 2.743227000  | -1.246425000 | -4.140468000 |
| H | 1.898305000  | 0.228003000  | -4.635120000 |
| H | 1.229409000  | -1.351367000 | -5.048496000 |
| C | -2.758982000 | 0.908204000  | -0.308322000 |
| H | -2.915309000 | 1.986115000  | -0.359711000 |
| H | -2.595648000 | 0.506137000  | -1.305120000 |
| C | -3.749121000 | 0.224161000  | 0.516764000  |
| C | -3.687804000 | -1.187750000 | 0.767026000  |
| C | -4.519247000 | -1.778439000 | 1.717617000  |
| H | -4.464511000 | -2.846901000 | 1.890085000  |
| C | -5.401438000 | -1.018061000 | 2.482199000  |
| H | -6.031650000 | -1.502777000 | 3.220680000  |
| C | -5.452053000 | 0.360494000  | 2.294808000  |
| H | -6.116936000 | 0.972454000  | 2.897113000  |
| C | -4.657845000 | 0.960570000  | 1.324850000  |
| H | -4.673683000 | 2.039186000  | 1.206889000  |
| C | -2.799799000 | -2.154469000 | -1.305016000 |
| H | -3.589699000 | -2.898149000 | -1.477280000 |
| H | -1.862361000 | -2.521897000 | -1.729275000 |
| H | -3.082847000 | -1.235111000 | -1.808329000 |
| C | -2.293617000 | -3.204818000 | 0.769165000  |
| H | -2.102804000 | -3.068535000 | 1.835919000  |
| H | -1.397638000 | -3.598183000 | 0.286745000  |
| H | -3.096656000 | -3.945232000 | 0.645694000  |
| N | 1.067837000  | 0.989899000  | 0.915316000  |
| C | 3.543697000  | 1.517355000  | -0.549500000 |
| H | 4.618141000  | 1.457957000  | -0.358935000 |
| H | 3.133953000  | 2.222509000  | 0.169387000  |
| C | 3.290938000  | 2.010102000  | -1.953412000 |
| C | 1.999825000  | 2.387591000  | -2.340586000 |
| H | 1.186564000  | 2.307784000  | -1.626097000 |
| C | 1.754655000  | 2.862776000  | -3.625513000 |

|    |              |              |              |
|----|--------------|--------------|--------------|
| H  | 0.749863000  | 3.164939000  | -3.906733000 |
| C  | 2.799410000  | 2.957984000  | -4.546856000 |
| H  | 2.609437000  | 3.329663000  | -5.549721000 |
| C  | 4.085631000  | 2.574217000  | -4.173948000 |
| H  | 4.902831000  | 2.643451000  | -4.886635000 |
| C  | 4.328270000  | 2.104923000  | -2.882584000 |
| H  | 5.333254000  | 1.815608000  | -2.587076000 |
| C  | 1.612386000  | 2.031643000  | 1.686087000  |
| C  | 1.064910000  | 3.329493000  | 1.526392000  |
| C  | 1.544542000  | 4.378893000  | 2.313921000  |
| H  | 1.125140000  | 5.372436000  | 2.180791000  |
| C  | 2.541902000  | 4.175986000  | 3.257067000  |
| H  | 2.912971000  | 5.003672000  | 3.854827000  |
| C  | 3.046334000  | 2.892938000  | 3.443112000  |
| H  | 3.802929000  | 2.729288000  | 4.203582000  |
| C  | 2.592997000  | 1.808402000  | 2.690619000  |
| C  | -0.067215000 | 3.606425000  | 0.556345000  |
| H  | -0.203474000 | 2.707883000  | -0.055630000 |
| C  | 0.234098000  | 4.774434000  | -0.386557000 |
| H  | 0.275181000  | 5.727337000  | 0.152286000  |
| H  | -0.549349000 | 4.863195000  | -1.147466000 |
| H  | 1.190380000  | 4.639812000  | -0.899355000 |
| C  | -1.373385000 | 3.860425000  | 1.320747000  |
| H  | -1.278632000 | 4.742830000  | 1.963155000  |
| H  | -1.642808000 | 3.020259000  | 1.971439000  |
| H  | -2.205717000 | 4.034311000  | 0.630853000  |
| C  | 3.069015000  | 0.408613000  | 3.031587000  |
| H  | 3.061953000  | -0.182096000 | 2.113651000  |
| C  | 2.090041000  | -0.244446000 | 4.013144000  |
| H  | 2.056370000  | 0.315510000  | 4.954623000  |
| H  | 2.390889000  | -1.272933000 | 4.239604000  |
| H  | 1.074938000  | -0.265506000 | 3.611003000  |
| C  | 4.490899000  | 0.356212000  | 3.590293000  |
| H  | 5.205690000  | 0.864020000  | 2.935768000  |
| H  | 4.809994000  | -0.685709000 | 3.701381000  |
| H  | 4.556780000  | 0.810193000  | 4.584745000  |
| Al | -5.897111000 | 0.665712000  | -1.217342000 |
| C  | -6.252853000 | 2.607242000  | -0.959849000 |
| H  | -6.608739000 | 2.966332000  | -1.939450000 |
| H  | -5.308469000 | 3.146847000  | -0.797348000 |
| C  | -7.275686000 | 2.986794000  | 0.113492000  |
| H  | -8.240371000 | 2.494625000  | -0.059555000 |

|   |              |              |              |
|---|--------------|--------------|--------------|
| H | -6.949157000 | 2.682068000  | 1.114708000  |
| H | -7.471471000 | 4.067342000  | 0.157226000  |
| C | -5.005026000 | 0.218654000  | -2.942862000 |
| H | -4.077454000 | 0.785752000  | -3.092623000 |
| H | -4.737439000 | -0.843313000 | -2.997060000 |
| C | -5.991429000 | 0.536638000  | -4.080117000 |
| H | -6.934245000 | -0.015756000 | -3.970293000 |
| H | -5.593157000 | 0.281006000  | -5.071972000 |
| H | -6.250146000 | 1.602284000  | -4.109142000 |
| C | -7.226817000 | -0.674244000 | -0.604591000 |
| H | -7.378110000 | -0.616880000 | 0.479698000  |
| H | -8.184930000 | -0.344996000 | -1.042095000 |
| C | -6.954909000 | -2.121990000 | -1.022647000 |
| H | -6.817124000 | -2.214641000 | -2.107132000 |
| H | -7.768509000 | -2.807571000 | -0.745655000 |
| H | -6.042192000 | -2.505155000 | -0.553716000 |
| C | -1.548444000 | -0.350708000 | 3.435240000  |
| H | -0.989658000 | 0.455429000  | 3.947055000  |
| H | -2.603442000 | -0.024133000 | 3.483094000  |
| C | -1.406713000 | -1.642706000 | 4.244364000  |
| H | -0.386009000 | -2.048450000 | 4.208175000  |
| H | -2.068222000 | -2.430203000 | 3.857721000  |
| H | -1.656226000 | -1.539279000 | 5.312678000  |

### Int-6

|   |              |              |              |
|---|--------------|--------------|--------------|
| Y | 1.056044000  | -1.163656000 | -0.630850000 |
| N | -0.862442000 | -0.919556000 | 0.698995000  |
| N | -2.710235000 | 0.507478000  | 0.073049000  |
| N | 2.596514000  | -1.909896000 | 1.283641000  |
| C | -1.518806000 | -0.127645000 | -0.167231000 |
| C | -3.495595000 | 0.252877000  | 1.282692000  |
| H | -3.248155000 | 0.988326000  | 2.054526000  |
| H | -3.221646000 | -0.726066000 | 1.670291000  |
| C | -4.981789000 | 0.292682000  | 1.033560000  |
| C | -5.595041000 | -0.634639000 | 0.186500000  |
| H | -4.991641000 | -1.391833000 | -0.301269000 |
| C | -6.968087000 | -0.592674000 | -0.035729000 |
| H | -7.429479000 | -1.318510000 | -0.699335000 |
| C | -7.749941000 | 0.375775000  | 0.595137000  |
| H | -8.821579000 | 0.409528000  | 0.420842000  |
| C | -7.150233000 | 1.295832000  | 1.452203000  |
| H | -7.752349000 | 2.049740000  | 1.951413000  |

|   |              |              |              |
|---|--------------|--------------|--------------|
| C | -5.773201000 | 1.252710000  | 1.668139000  |
| H | -5.303437000 | 1.971147000  | 2.335138000  |
| C | -1.042798000 | -1.194738000 | 2.069815000  |
| C | -1.244242000 | -2.557067000 | 2.413550000  |
| C | -1.272600000 | -2.921746000 | 3.760643000  |
| H | -1.429839000 | -3.961169000 | 4.030551000  |
| C | -1.100546000 | -1.973663000 | 4.764259000  |
| H | -1.117781000 | -2.272317000 | 5.808573000  |
| C | -0.921946000 | -0.639200000 | 4.420843000  |
| H | -0.804704000 | 0.101292000  | 5.206186000  |
| C | -0.896581000 | -0.222190000 | 3.086765000  |
| C | -1.481358000 | -3.587042000 | 1.323773000  |
| H | -0.852731000 | -3.310945000 | 0.468525000  |
| C | -2.933939000 | -3.510111000 | 0.840736000  |
| H | -3.627591000 | -3.707883000 | 1.665340000  |
| H | -3.125021000 | -4.243780000 | 0.050849000  |
| H | -3.158464000 | -2.519063000 | 0.440170000  |
| C | -1.124799000 | -5.017653000 | 1.719817000  |
| H | -1.820851000 | -5.422610000 | 2.462521000  |
| H | -0.113940000 | -5.091343000 | 2.132876000  |
| H | -1.176507000 | -5.670112000 | 0.842586000  |
| C | -0.708951000 | 1.246683000  | 2.766903000  |
| H | -1.110309000 | 1.426818000  | 1.768919000  |
| C | 0.768505000  | 1.630611000  | 2.729017000  |
| H | 1.247812000  | 1.472271000  | 3.700186000  |
| H | 0.883224000  | 2.684964000  | 2.463658000  |
| H | 1.316106000  | 1.041625000  | 1.991084000  |
| C | -1.457390000 | 2.179626000  | 3.722075000  |
| H | -2.499309000 | 1.876688000  | 3.867196000  |
| H | -1.451481000 | 3.196295000  | 3.319892000  |
| H | -0.983731000 | 2.216395000  | 4.709112000  |
| C | 3.193151000  | 0.505162000  | -0.221578000 |
| H | 2.908129000  | 1.102871000  | -1.089249000 |
| H | 2.478139000  | 0.573540000  | 0.599296000  |
| C | 3.788108000  | -0.800288000 | -0.543378000 |
| C | 3.574840000  | -1.978742000 | 0.224658000  |
| C | 4.210398000  | -3.178637000 | -0.115363000 |
| H | 4.044112000  | -4.064360000 | 0.486564000  |
| C | 5.033025000  | -3.255125000 | -1.229211000 |
| H | 5.516541000  | -4.193229000 | -1.482451000 |
| C | 5.221806000  | -2.119684000 | -2.022333000 |
| H | 5.853439000  | -2.168818000 | -2.904419000 |



|   |              |              |              |
|---|--------------|--------------|--------------|
| C | 4.613332000  | -0.924296000 | -1.682458000 |
| H | 4.782322000  | -0.038602000 | -2.287222000 |
| C | 3.054561000  | -1.156362000 | 2.463597000  |
| H | 3.797299000  | -1.742252000 | 3.020752000  |
| H | 2.199185000  | -0.952691000 | 3.111403000  |
| H | 3.514618000  | -0.215321000 | 2.170264000  |
| C | 2.068230000  | -3.200941000 | 1.728759000  |
| H | 1.701748000  | -3.782449000 | 0.879373000  |
| H | 1.240796000  | -3.010990000 | 2.414364000  |
| H | 2.823338000  | -3.798744000 | 2.257558000  |
| N | -0.846147000 | -0.026554000 | -1.339575000 |
| C | -3.049533000 | 1.759895000  | -0.614374000 |
| H | -4.138524000 | 1.810606000  | -0.676160000 |
| H | -2.678164000 | 1.721536000  | -1.635367000 |
| C | -2.507248000 | 2.983549000  | 0.081707000  |
| C | -1.132630000 | 3.247529000  | 0.057074000  |
| H | -0.471693000 | 2.555992000  | -0.454960000 |
| C | -0.613296000 | 4.380457000  | 0.675537000  |
| H | 0.454641000  | 4.575439000  | 0.637211000  |
| C | -1.467563000 | 5.267922000  | 1.333259000  |
| H | -1.065189000 | 6.155189000  | 1.813474000  |
| C | -2.836735000 | 5.012350000  | 1.367033000  |
| H | -3.506237000 | 5.699782000  | 1.876471000  |
| C | -3.352679000 | 3.874711000  | 0.744760000  |
| H | -4.422133000 | 3.681863000  | 0.760515000  |
| C | -1.349493000 | 0.321351000  | -2.606465000 |
| C | -0.627540000 | 1.274056000  | -3.366544000 |
| C | -1.098381000 | 1.647550000  | -4.627382000 |
| H | -0.546608000 | 2.387042000  | -5.200584000 |
| C | -2.254116000 | 1.091815000  | -5.156136000 |
| H | -2.619663000 | 1.403408000  | -6.130396000 |
| C | -2.924385000 | 0.107925000  | -4.436043000 |
| H | -3.803809000 | -0.353466000 | -4.872506000 |
| C | -2.485865000 | -0.312819000 | -3.179505000 |
| C | 0.690179000  | 1.841666000  | -2.881271000 |
| H | 0.769578000  | 1.612704000  | -1.811635000 |
| C | 0.804586000  | 3.359131000  | -3.029696000 |
| H | 0.836760000  | 3.662721000  | -4.081247000 |
| H | 1.728698000  | 3.715050000  | -2.562120000 |
| H | -0.037483000 | 3.871775000  | -2.556514000 |
| C | 1.847715000  | 1.142990000  | -3.609458000 |
| H | 1.790168000  | 1.332257000  | -4.686735000 |

|    |              |              |              |
|----|--------------|--------------|--------------|
| H  | 1.822348000  | 0.053063000  | -3.486064000 |
| H  | 2.817305000  | 1.509848000  | -3.259712000 |
| C  | -3.156897000 | -1.493856000 | -2.501425000 |
| H  | -3.195329000 | -1.291554000 | -1.429045000 |
| C  | -2.309389000 | -2.753981000 | -2.706566000 |
| H  | -2.215705000 | -2.988532000 | -3.772885000 |
| H  | -2.766070000 | -3.615388000 | -2.208723000 |
| H  | -1.301990000 | -2.623738000 | -2.308442000 |
| C  | -4.592166000 | -1.746292000 | -2.960553000 |
| H  | -5.215462000 | -0.851689000 | -2.869996000 |
| H  | -5.042663000 | -2.536989000 | -2.351052000 |
| H  | -4.634122000 | -2.090384000 | -3.999386000 |
| Al | 4.682420000  | 1.900169000  | 0.516926000  |
| C  | 4.510043000  | 3.419538000  | -0.792909000 |
| H  | 4.951875000  | 4.327805000  | -0.354377000 |
| H  | 3.441834000  | 3.664064000  | -0.920030000 |
| C  | 5.148493000  | 3.170477000  | -2.161637000 |
| H  | 6.231304000  | 3.020811000  | -2.071110000 |
| H  | 4.756506000  | 2.262083000  | -2.639787000 |
| H  | 4.997255000  | 3.988561000  | -2.882133000 |
| C  | 4.163753000  | 2.490912000  | 2.372060000  |
| H  | 3.248287000  | 3.099103000  | 2.320142000  |
| H  | 3.922245000  | 1.666580000  | 3.058288000  |
| C  | 5.287008000  | 3.333163000  | 2.993335000  |
| H  | 6.206514000  | 2.746998000  | 3.115555000  |
| H  | 5.034403000  | 3.739294000  | 3.984550000  |
| H  | 5.547791000  | 4.191317000  | 2.359847000  |
| C  | 6.465757000  | 0.985338000  | 0.469601000  |
| H  | 6.707755000  | 0.639331000  | -0.545601000 |
| H  | 7.219234000  | 1.760025000  | 0.687468000  |
| C  | 6.646294000  | -0.177491000 | 1.450017000  |
| H  | 6.401527000  | 0.115628000  | 2.479535000  |
| H  | 7.671278000  | -0.577910000 | 1.471530000  |
| H  | 5.989057000  | -1.017133000 | 1.195523000  |
| C  | 1.273257000  | -3.037160000 | -2.091201000 |
| H  | 0.764712000  | -2.717882000 | -3.019990000 |
| H  | 2.347073000  | -3.035482000 | -2.349324000 |
| C  | 0.850580000  | -4.473169000 | -1.770238000 |
| H  | -0.213058000 | -4.542967000 | -1.509023000 |
| H  | 1.409596000  | -4.878453000 | -0.916124000 |
| H  | 1.011732000  | -5.179082000 | -2.599650000 |

**Int-7**

|   |              |              |              |
|---|--------------|--------------|--------------|
| Y | 16.915135000 | 0.025318000  | 19.203481000 |
| N | 18.361096000 | 1.744849000  | 18.620777000 |
| N | 18.935670000 | 3.633349000  | 20.005561000 |
| N | 11.490182000 | 0.907433000  | 19.179058000 |
| C | 18.301426000 | 2.434067000  | 19.782156000 |
| C | 19.800800000 | 4.243113000  | 18.978564000 |
| H | 19.195042000 | 4.867663000  | 18.315174000 |
| H | 20.216619000 | 3.444570000  | 18.370595000 |
| C | 20.935776000 | 5.078924000  | 19.517090000 |
| C | 22.082479000 | 4.481625000  | 20.049256000 |
| H | 22.153780000 | 3.400932000  | 20.085229000 |
| C | 23.136956000 | 5.258960000  | 20.521490000 |
| H | 24.017741000 | 4.777617000  | 20.937242000 |
| C | 23.066316000 | 6.649620000  | 20.448525000 |
| H | 23.888709000 | 7.257912000  | 20.814693000 |
| C | 21.941621000 | 7.254471000  | 19.890611000 |
| H | 21.880857000 | 8.336670000  | 19.820092000 |
| C | 20.885350000 | 6.473157000  | 19.428642000 |
| H | 20.005731000 | 6.949015000  | 19.005602000 |
| C | 18.781210000 | 2.093806000  | 17.323431000 |
| C | 19.849473000 | 1.343395000  | 16.769556000 |
| C | 20.219979000 | 1.578177000  | 15.444565000 |
| H | 21.040106000 | 1.015624000  | 15.010416000 |
| C | 19.554109000 | 2.521144000  | 14.667121000 |
| H | 19.855218000 | 2.690464000  | 13.637221000 |
| C | 18.498658000 | 3.241615000  | 15.213451000 |
| H | 17.977893000 | 3.970340000  | 14.599667000 |
| C | 18.091611000 | 3.043836000  | 16.535106000 |
| C | 20.588474000 | 0.327302000  | 17.624099000 |
| H | 19.839576000 | -0.173359000 | 18.248672000 |
| C | 21.553149000 | 1.013222000  | 18.596613000 |
| H | 22.291114000 | 1.618279000  | 18.058694000 |
| H | 22.091185000 | 0.269278000  | 19.194283000 |
| H | 21.009231000 | 1.660841000  | 19.287295000 |
| C | 21.306018000 | -0.753405000 | 16.819432000 |
| H | 22.175343000 | -0.356174000 | 16.283782000 |
| H | 20.642166000 | -1.221836000 | 16.085980000 |
| H | 21.672452000 | -1.535612000 | 17.492286000 |
| C | 16.911943000 | 3.814029000  | 17.096098000 |
| H | 17.018179000 | 3.819717000  | 18.184978000 |
| C | 15.589501000 | 3.114531000  | 16.776251000 |

|   |              |              |              |
|---|--------------|--------------|--------------|
| H | 15.409185000 | 3.099435000  | 15.696876000 |
| H | 14.751200000 | 3.631545000  | 17.256028000 |
| H | 15.582005000 | 2.076764000  | 17.115149000 |
| C | 16.853388000 | 5.266334000  | 16.619386000 |
| H | 17.786711000 | 5.804993000  | 16.809877000 |
| H | 16.042768000 | 5.797757000  | 17.128713000 |
| H | 16.645011000 | 5.327525000  | 15.546577000 |
| C | 14.310373000 | 0.496179000  | 18.971806000 |
| H | 14.864046000 | 1.402829000  | 19.275664000 |
| H | 13.587187000 | 0.936641000  | 18.269853000 |
| C | 13.523301000 | -0.048420000 | 20.128031000 |
| C | 12.119493000 | 0.135046000  | 20.191681000 |
| C | 11.386205000 | -0.459762000 | 21.223896000 |
| H | 10.309572000 | -0.326459000 | 21.258202000 |
| C | 12.014196000 | -1.205255000 | 22.219305000 |
| H | 11.423807000 | -1.653166000 | 23.013646000 |
| C | 13.396150000 | -1.361506000 | 22.192198000 |
| H | 13.906622000 | -1.936770000 | 22.958750000 |
| C | 14.125049000 | -0.797501000 | 21.147124000 |
| H | 15.197519000 | -0.987458000 | 21.129301000 |
| C | 11.687649000 | 2.342170000  | 19.325988000 |
| H | 11.089757000 | 2.765834000  | 20.151594000 |
| H | 11.399967000 | 2.850493000  | 18.399037000 |
| H | 12.738960000 | 2.562284000  | 19.522518000 |
| C | 10.110005000 | 0.584058000  | 18.881729000 |
| H | 9.998653000  | -0.496414000 | 18.761375000 |
| H | 9.832680000  | 1.063485000  | 17.937103000 |
| H | 9.394382000  | 0.927583000  | 19.649974000 |
| N | 17.525254000 | 1.788758000  | 20.679727000 |
| C | 18.690632000 | 4.444066000  | 21.198051000 |
| H | 19.600143000 | 4.476100000  | 21.806431000 |
| H | 17.937034000 | 3.947276000  | 21.803968000 |
| C | 18.248803000 | 5.862555000  | 20.941741000 |
| C | 17.379747000 | 6.204369000  | 19.906367000 |
| H | 17.011375000 | 5.430978000  | 19.244904000 |
| C | 16.996415000 | 7.529132000  | 19.705550000 |
| H | 16.332064000 | 7.778683000  | 18.883015000 |
| C | 17.466472000 | 8.529727000  | 20.554007000 |
| H | 17.171659000 | 9.563402000  | 20.397203000 |
| C | 18.319668000 | 8.193962000  | 21.605417000 |
| H | 18.694296000 | 8.966102000  | 22.271480000 |
| C | 18.711587000 | 6.871907000  | 21.790950000 |

|    |              |              |              |
|----|--------------|--------------|--------------|
| H  | 19.405362000 | 6.618247000  | 22.588378000 |
| C  | 17.570721000 | 1.872652000  | 22.085538000 |
| C  | 16.375542000 | 2.220275000  | 22.770030000 |
| C  | 16.390239000 | 2.310083000  | 24.161541000 |
| H  | 15.482151000 | 2.588261000  | 24.686117000 |
| C  | 17.546798000 | 2.048540000  | 24.890170000 |
| H  | 17.544322000 | 2.135491000  | 25.973101000 |
| C  | 18.694065000 | 1.648594000  | 24.220086000 |
| H  | 19.587876000 | 1.408156000  | 24.789487000 |
| C  | 18.727259000 | 1.526654000  | 22.827178000 |
| C  | 15.108385000 | 2.511234000  | 21.988412000 |
| H  | 15.061111000 | 1.760749000  | 21.195604000 |
| C  | 15.162303000 | 3.877353000  | 21.299519000 |
| H  | 15.298253000 | 4.686722000  | 22.024559000 |
| H  | 14.232928000 | 4.071562000  | 20.751833000 |
| H  | 15.985204000 | 3.920189000  | 20.585060000 |
| C  | 13.826640000 | 2.367900000  | 22.803506000 |
| H  | 13.724927000 | 3.160523000  | 23.553687000 |
| H  | 13.776167000 | 1.400623000  | 23.310821000 |
| H  | 12.959533000 | 2.436106000  | 22.140334000 |
| C  | 20.001588000 | 1.013967000  | 22.181751000 |
| H  | 19.794262000 | 0.842266000  | 21.121042000 |
| C  | 20.458570000 | -0.317114000 | 22.792093000 |
| H  | 20.813582000 | -0.181839000 | 23.819626000 |
| H  | 21.292005000 | -0.729481000 | 22.212154000 |
| H  | 19.656082000 | -1.056666000 | 22.802838000 |
| C  | 21.139636000 | 2.029643000  | 22.296146000 |
| H  | 20.882025000 | 2.980554000  | 21.832162000 |
| H  | 22.048492000 | 1.652309000  | 21.814545000 |
| H  | 21.380665000 | 2.226309000  | 23.346911000 |
| C  | 17.962361000 | -1.507112000 | 20.692345000 |
| H  | 19.042834000 | -1.381150000 | 20.498993000 |
| H  | 17.805182000 | -1.008091000 | 21.663929000 |
| Al | 14.558627000 | -0.970305000 | 17.450618000 |
| C  | 13.001736000 | -2.189128000 | 17.661141000 |
| H  | 12.831393000 | -2.647603000 | 16.673316000 |
| H  | 12.111168000 | -1.572925000 | 17.847961000 |
| C  | 13.094316000 | -3.289561000 | 18.722004000 |
| H  | 13.974522000 | -3.928157000 | 18.570221000 |
| H  | 13.178421000 | -2.868170000 | 19.728725000 |
| H  | 12.220128000 | -3.956637000 | 18.726865000 |
| C  | 14.654813000 | -0.086301000 | 15.662462000 |

|   |              |              |              |
|---|--------------|--------------|--------------|
| H | 15.572166000 | 0.502477000  | 15.521371000 |
| H | 14.736340000 | -0.908318000 | 14.932176000 |
| C | 13.427440000 | 0.763152000  | 15.317097000 |
| H | 12.505888000 | 0.170491000  | 15.373646000 |
| H | 13.466294000 | 1.198441000  | 14.308060000 |
| H | 13.298403000 | 1.599089000  | 16.015962000 |
| C | 16.317988000 | -2.041053000 | 17.683436000 |
| H | 16.570268000 | -2.454926000 | 18.671347000 |
| H | 15.837946000 | -2.903889000 | 17.197252000 |
| C | 17.601219000 | -1.749882000 | 16.891123000 |
| H | 17.372140000 | -1.541572000 | 15.841852000 |
| H | 18.319433000 | -2.577227000 | 16.927711000 |
| H | 18.183755000 | -0.868763000 | 17.215511000 |
| C | 17.650783000 | -2.997089000 | 20.841471000 |
| H | 17.911777000 | -3.560224000 | 19.935521000 |
| H | 18.187761000 | -3.483242000 | 21.671616000 |
| H | 16.581676000 | -3.178287000 | 21.020198000 |

#### TS-4

|   |              |              |              |
|---|--------------|--------------|--------------|
| Y | 18.090217000 | 0.323507000  | 19.022426000 |
| N | 19.542298000 | 2.027020000  | 18.432355000 |
| N | 20.150780000 | 3.833238000  | 19.877534000 |
| N | 11.158458000 | -0.953427000 | 17.472770000 |
| C | 19.412940000 | 2.713119000  | 19.594407000 |
| C | 21.487862000 | 4.012361000  | 19.299301000 |
| H | 21.622842000 | 5.076347000  | 19.090564000 |
| H | 21.533965000 | 3.493391000  | 18.345524000 |
| C | 22.584272000 | 3.518221000  | 20.211515000 |
| C | 22.812225000 | 2.145064000  | 20.355632000 |
| H | 22.191000000 | 1.442815000  | 19.808566000 |
| C | 23.833181000 | 1.677060000  | 21.177763000 |
| H | 24.006141000 | 0.608439000  | 21.269583000 |
| C | 24.634222000 | 2.580020000  | 21.878663000 |
| H | 25.431794000 | 2.216748000  | 22.520450000 |
| C | 24.407216000 | 3.948600000  | 21.750874000 |
| H | 25.026443000 | 4.656812000  | 22.294400000 |
| C | 23.389119000 | 4.413746000  | 20.918578000 |
| H | 23.215926000 | 5.481174000  | 20.811478000 |
| C | 19.943850000 | 2.537756000  | 17.185040000 |
| C | 20.970893000 | 1.861823000  | 16.485365000 |
| C | 21.332548000 | 2.302858000  | 15.210294000 |
| H | 22.124188000 | 1.785702000  | 14.674858000 |

|   |              |              |              |
|---|--------------|--------------|--------------|
| C | 20.703019000 | 3.392287000  | 14.623292000 |
| H | 21.000603000 | 3.732294000  | 13.635419000 |
| C | 19.675920000 | 4.038480000  | 15.305963000 |
| H | 19.172387000 | 4.873797000  | 14.830126000 |
| C | 19.266584000 | 3.624849000  | 16.575110000 |
| C | 21.667860000 | 0.660429000  | 17.091836000 |
| H | 21.338630000 | 0.596610000  | 18.133960000 |
| C | 23.191955000 | 0.800202000  | 17.084033000 |
| H | 23.592254000 | 0.793388000  | 16.064520000 |
| H | 23.656496000 | -0.032267000 | 17.623845000 |
| H | 23.512051000 | 1.730056000  | 17.562692000 |
| C | 21.235888000 | -0.632126000 | 16.390429000 |
| H | 21.548037000 | -0.631013000 | 15.339998000 |
| H | 20.147006000 | -0.753354000 | 16.400112000 |
| H | 21.677788000 | -1.509124000 | 16.875134000 |
| C | 18.055387000 | 4.261395000  | 17.234650000 |
| H | 18.243012000 | 4.314356000  | 18.310552000 |
| C | 16.814441000 | 3.386642000  | 17.023420000 |
| H | 16.608919000 | 3.258092000  | 15.955938000 |
| H | 15.929374000 | 3.833103000  | 17.486324000 |
| H | 16.941008000 | 2.388235000  | 17.451665000 |
| C | 17.765969000 | 5.684753000  | 16.756071000 |
| H | 18.660223000 | 6.315281000  | 16.780874000 |
| H | 17.004848000 | 6.146236000  | 17.393351000 |
| H | 17.375359000 | 5.697754000  | 15.732931000 |
| C | 13.150052000 | -0.691597000 | 19.377902000 |
| H | 13.890212000 | -0.297285000 | 20.084444000 |
| H | 13.106706000 | -1.774720000 | 19.563341000 |
| C | 11.832977000 | -0.033615000 | 19.605497000 |
| C | 10.828290000 | -0.150382000 | 18.616244000 |
| C | 9.617833000  | 0.530850000  | 18.738558000 |
| H | 8.857678000  | 0.432649000  | 17.969783000 |
| C | 9.381875000  | 1.355714000  | 19.839087000 |
| H | 8.439085000  | 1.889266000  | 19.922037000 |
| C | 10.359996000 | 1.489219000  | 20.820741000 |
| H | 10.188169000 | 2.132607000  | 21.679777000 |
| C | 11.563939000 | 0.795923000  | 20.701193000 |
| H | 12.327790000 | 0.906597000  | 21.466933000 |
| C | 10.413289000 | -0.651393000 | 16.255584000 |
| H | 9.373259000  | -1.011711000 | 16.295968000 |
| H | 10.408360000 | 0.421367000  | 16.073328000 |
| C | 11.033240000 | -2.388099000 | 17.756002000 |

|   |              |              |              |
|---|--------------|--------------|--------------|
| H | 11.586887000 | -2.654245000 | 18.655140000 |
| H | 11.435996000 | -2.960651000 | 16.917316000 |
| H | 9.979435000  | -2.669932000 | 17.903212000 |
| N | 18.490508000 | 2.156715000  | 20.395953000 |
| C | 19.904399000 | 4.635418000  | 21.073238000 |
| H | 20.524993000 | 4.283626000  | 21.905154000 |
| H | 18.867015000 | 4.497035000  | 21.370619000 |
| C | 20.146865000 | 6.107022000  | 20.857096000 |
| C | 19.593594000 | 6.771914000  | 19.759541000 |
| H | 19.023226000 | 6.206292000  | 19.031538000 |
| C | 19.781742000 | 8.140676000  | 19.592639000 |
| H | 19.346930000 | 8.644214000  | 18.733776000 |
| C | 20.523121000 | 8.864091000  | 20.527452000 |
| H | 20.670394000 | 9.932524000  | 20.398411000 |
| C | 21.074931000 | 8.209094000  | 21.626647000 |
| H | 21.654769000 | 8.765093000  | 22.358063000 |
| C | 20.889674000 | 6.836311000  | 21.787495000 |
| H | 21.326216000 | 6.322870000  | 22.640610000 |
| C | 18.086520000 | 2.464327000  | 21.712674000 |
| C | 16.807953000 | 3.044983000  | 21.882695000 |
| C | 16.326179000 | 3.253219000  | 23.177320000 |
| H | 15.348922000 | 3.708718000  | 23.312746000 |
| C | 17.081229000 | 2.898705000  | 24.288920000 |
| H | 16.694080000 | 3.064772000  | 25.290266000 |
| C | 18.343441000 | 2.340261000  | 24.111323000 |
| H | 18.936123000 | 2.077539000  | 24.982329000 |
| C | 18.869042000 | 2.117162000  | 22.837085000 |
| C | 15.990354000 | 3.504167000  | 20.690557000 |
| H | 16.519346000 | 3.174021000  | 19.792164000 |
| C | 15.915293000 | 5.033794000  | 20.634977000 |
| H | 15.408523000 | 5.437570000  | 21.518448000 |
| H | 15.354990000 | 5.361164000  | 19.752368000 |
| H | 16.910673000 | 5.487914000  | 20.590712000 |
| C | 14.592464000 | 2.883093000  | 20.668954000 |
| H | 13.999564000 | 3.189698000  | 21.537181000 |
| H | 14.639401000 | 1.790022000  | 20.672071000 |
| H | 14.041461000 | 3.188276000  | 19.774262000 |
| C | 20.246027000 | 1.507441000  | 22.671925000 |
| H | 20.611940000 | 1.780098000  | 21.678369000 |
| C | 20.170223000 | -0.020754000 | 22.730598000 |
| H | 19.822355000 | -0.355150000 | 23.714713000 |
| H | 21.152750000 | -0.469413000 | 22.547089000 |



|    |              |              |              |
|----|--------------|--------------|--------------|
| H  | 19.479762000 | -0.418377000 | 21.981946000 |
| C  | 21.263141000 | 2.034151000  | 23.684530000 |
| H  | 21.299893000 | 3.128044000  | 23.692469000 |
| H  | 22.262959000 | 1.671407000  | 23.432925000 |
| H  | 21.038796000 | 1.698853000  | 24.702853000 |
| C  | 19.136524000 | -1.736440000 | 19.637596000 |
| H  | 20.231630000 | -1.639080000 | 19.726770000 |
| H  | 18.801773000 | -2.062502000 | 20.637524000 |
| Al | 13.643273000 | -0.396535000 | 17.425068000 |
| C  | 13.908068000 | -1.875660000 | 16.092648000 |
| H  | 14.576425000 | -1.515254000 | 15.296128000 |
| H  | 12.964597000 | -2.102618000 | 15.575727000 |
| C  | 14.482736000 | -3.169834000 | 16.677320000 |
| H  | 15.455035000 | -3.000430000 | 17.159577000 |
| H  | 13.829682000 | -3.593701000 | 17.450589000 |
| H  | 14.640610000 | -3.961108000 | 15.929295000 |
| C  | 13.539116000 | 1.533474000  | 16.851340000 |
| H  | 13.801799000 | 2.090628000  | 17.765118000 |
| H  | 14.394415000 | 1.694961000  | 16.176290000 |
| C  | 12.309524000 | 2.198518000  | 16.233504000 |
| H  | 12.018321000 | 1.721043000  | 15.290241000 |
| H  | 12.470876000 | 3.263415000  | 16.006435000 |
| H  | 11.446668000 | 2.149921000  | 16.907345000 |
| C  | 15.919908000 | -0.188258000 | 17.986392000 |
| H  | 15.498546000 | 0.737025000  | 18.375429000 |
| H  | 15.775932000 | -1.103349000 | 18.557152000 |
| C  | 16.663714000 | -0.215114000 | 16.680894000 |
| H  | 16.684413000 | -1.222388000 | 16.257381000 |
| H  | 17.751786000 | 0.094037000  | 16.683353000 |
| H  | 16.235477000 | 0.451761000  | 15.926503000 |
| H  | 10.907664000 | -1.144676000 | 15.413850000 |
| C  | 18.798576000 | -2.846840000 | 18.627853000 |
| H  | 19.135492000 | -2.605539000 | 17.610177000 |
| H  | 19.248424000 | -3.822872000 | 18.868633000 |
| H  | 17.715853000 | -3.023105000 | 18.561994000 |

### Int-8

|   |              |              |              |
|---|--------------|--------------|--------------|
| Y | 0.413469000  | -1.744700000 | 0.045124000  |
| N | 1.803594000  | -0.002161000 | -0.659983000 |
| N | 2.396181000  | 1.893376000  | 0.679898000  |
| N | -6.594029000 | -2.631745000 | -2.288652000 |
| C | 1.693394000  | 0.730300000  | 0.473708000  |

|   |              |              |              |
|---|--------------|--------------|--------------|
| C | 3.683353000  | 2.121893000  | 0.017747000  |
| H | 3.757133000  | 3.188111000  | -0.209202000 |
| H | 3.687369000  | 1.595114000  | -0.933424000 |
| C | 4.868272000  | 1.686873000  | 0.846411000  |
| C | 5.148703000  | 0.325479000  | 1.011100000  |
| H | 4.494216000  | -0.411047000 | 0.555973000  |
| C | 6.257566000  | -0.087933000 | 1.743306000  |
| H | 6.470045000  | -1.148012000 | 1.849530000  |
| C | 7.097850000  | 0.858228000  | 2.333231000  |
| H | 7.964169000  | 0.537056000  | 2.904500000  |
| C | 6.820020000  | 2.215304000  | 2.185535000  |
| H | 7.468913000  | 2.957214000  | 2.642703000  |
| C | 5.712808000  | 2.625164000  | 1.442267000  |
| H | 5.503009000  | 3.683640000  | 1.313893000  |
| C | 2.144890000  | 0.442996000  | -1.948661000 |
| C | 3.131503000  | -0.280963000 | -2.660495000 |
| C | 3.423680000  | 0.074228000  | -3.979530000 |
| H | 4.181877000  | -0.483848000 | -4.522424000 |
| C | 2.769184000  | 1.128736000  | -4.601316000 |
| H | 3.012409000  | 1.401641000  | -5.624316000 |
| C | 1.788718000  | 1.828849000  | -3.903531000 |
| H | 1.266297000  | 2.639552000  | -4.400844000 |
| C | 1.447414000  | 1.500704000  | -2.590723000 |
| C | 3.867897000  | -1.440930000 | -2.019751000 |
| H | 3.583563000  | -1.451891000 | -0.962585000 |
| C | 5.387936000  | -1.279062000 | -2.100698000 |
| H | 5.744896000  | -1.339707000 | -3.134567000 |
| H | 5.888981000  | -2.071984000 | -1.534348000 |
| H | 5.711460000  | -0.317826000 | -1.691644000 |
| C | 3.432343000  | -2.778413000 | -2.627819000 |
| H | 3.697260000  | -2.831458000 | -3.689892000 |
| H | 2.348841000  | -2.921854000 | -2.561937000 |
| H | 3.915540000  | -3.617141000 | -2.115600000 |
| C | 0.287018000  | 2.197503000  | -1.903586000 |
| H | 0.553975000  | 2.326770000  | -0.852208000 |
| C | -0.964995000 | 1.317402000  | -1.958140000 |
| H | -1.263469000 | 1.128106000  | -2.994096000 |
| H | -1.804029000 | 1.794718000  | -1.443365000 |
| H | -0.792201000 | 0.348813000  | -1.484319000 |
| C | -0.027325000 | 3.584608000  | -2.462801000 |
| H | 0.862810000  | 4.220105000  | -2.506343000 |
| H | -0.771084000 | 4.081090000  | -1.830376000 |

|   |              |              |              |
|---|--------------|--------------|--------------|
| H | -0.454824000 | 3.531158000  | -3.469878000 |
| C | -4.751229000 | -2.659833000 | -0.243572000 |
| H | -3.990796000 | -2.271923000 | 0.439332000  |
| H | -4.825355000 | -3.739979000 | -0.043999000 |
| C | -6.062780000 | -1.981527000 | -0.011816000 |
| C | -6.997514000 | -1.950119000 | -1.066974000 |
| C | -8.211211000 | -1.278200000 | -0.949385000 |
| H | -8.917017000 | -1.266037000 | -1.773965000 |
| C | -8.512909000 | -0.595709000 | 0.228932000  |
| H | -9.454779000 | -0.062235000 | 0.317854000  |
| C | -7.599884000 | -0.599174000 | 1.281320000  |
| H | -7.825144000 | -0.061825000 | 2.198657000  |
| C | -6.394592000 | -1.287573000 | 1.158992000  |
| H | -5.682468000 | -1.283742000 | 1.979832000  |
| C | -7.148200000 | -2.048780000 | -3.517826000 |
| H | -8.220343000 | -2.256467000 | -3.625513000 |
| H | -6.987258000 | -0.970580000 | -3.517156000 |
| C | -6.946181000 | -4.064892000 | -2.221363000 |
| H | -6.501975000 | -4.513388000 | -1.332090000 |
| H | -6.560658000 | -4.573902000 | -3.107098000 |
| H | -8.035239000 | -4.192133000 | -2.173985000 |
| N | 0.820862000  | 0.185284000  | 1.333346000  |
| C | 2.137344000  | 2.744899000  | 1.839554000  |
| H | 2.777062000  | 2.457169000  | 2.681922000  |
| H | 1.106776000  | 2.583907000  | 2.152173000  |
| C | 2.335330000  | 4.210834000  | 1.549663000  |
| C | 1.620464000  | 4.842097000  | 0.527818000  |
| H | 0.935214000  | 4.259530000  | -0.077957000 |
| C | 1.789939000  | 6.200724000  | 0.279477000  |
| H | 1.228646000  | 6.677506000  | -0.519257000 |
| C | 2.674966000  | 6.949407000  | 1.056872000  |
| H | 2.807856000  | 8.009986000  | 0.863288000  |
| C | 3.385287000  | 6.330184000  | 2.082840000  |
| H | 4.074754000  | 6.905886000  | 2.694065000  |
| C | 3.216758000  | 4.966947000  | 2.324604000  |
| H | 3.777344000  | 4.480944000  | 3.118917000  |
| C | 0.510746000  | 0.469143000  | 2.677324000  |
| C | -0.820252000 | 0.859261000  | 2.959015000  |
| C | -1.208168000 | 1.045495000  | 4.288018000  |
| H | -2.226499000 | 1.357683000  | 4.504634000  |
| C | -0.311714000 | 0.848626000  | 5.330867000  |
| H | -0.625343000 | 0.997540000  | 6.360361000  |

|    |              |              |              |
|----|--------------|--------------|--------------|
| C  | 0.995340000  | 0.464141000  | 5.046351000  |
| H  | 1.694323000  | 0.315550000  | 5.863615000  |
| C  | 1.430991000  | 0.269678000  | 3.734314000  |
| C  | -1.809329000 | 1.125892000  | 1.840818000  |
| H  | -1.321950000 | 0.836587000  | 0.905530000  |
| C  | -2.130002000 | 2.620433000  | 1.738583000  |
| H  | -2.613626000 | 2.986366000  | 2.651335000  |
| H  | -2.807521000 | 2.817243000  | 0.900348000  |
| H  | -1.221565000 | 3.213151000  | 1.587097000  |
| C  | -3.084851000 | 0.292795000  | 1.982374000  |
| H  | -3.645184000 | 0.556832000  | 2.886234000  |
| H  | -2.855935000 | -0.776921000 | 2.036880000  |
| H  | -3.748238000 | 0.450877000  | 1.127045000  |
| C  | 2.855931000  | -0.161388000 | 3.454254000  |
| H  | 3.127738000  | 0.219336000  | 2.467848000  |
| C  | 2.967886000  | -1.687015000 | 3.391531000  |
| H  | 2.696509000  | -2.138028000 | 4.352852000  |
| H  | 3.992563000  | -1.990624000 | 3.150612000  |
| H  | 2.309791000  | -2.110010000 | 2.627580000  |
| C  | 3.871869000  | 0.411563000  | 4.441502000  |
| H  | 3.761219000  | 1.494925000  | 4.554592000  |
| H  | 4.885856000  | 0.215391000  | 4.083352000  |
| H  | 3.781778000  | -0.040555000 | 5.435271000  |
| C  | 1.533376000  | -3.776082000 | 0.694331000  |
| H  | 2.633930000  | -3.720625000 | 0.651929000  |
| H  | 1.305614000  | -4.016416000 | 1.748495000  |
| Al | -4.411351000 | -2.429023000 | -2.214674000 |
| C  | -3.814934000 | -3.940892000 | -3.371336000 |
| H  | -2.913540000 | -3.613218000 | -3.907721000 |
| H  | -4.558972000 | -4.106605000 | -4.167636000 |
| C  | -3.520106000 | -5.269018000 | -2.667513000 |
| H  | -2.752119000 | -5.149341000 | -1.893188000 |
| H  | -4.405645000 | -5.675550000 | -2.163412000 |
| H  | -3.160136000 | -6.050641000 | -3.351856000 |
| C  | -4.199452000 | -0.588510000 | -2.956402000 |
| H  | -3.139315000 | -0.458669000 | -3.216507000 |
| H  | -4.726755000 | -0.520244000 | -3.920194000 |
| C  | -4.637445000 | 0.567338000  | -2.051380000 |
| H  | -5.705711000 | 0.518415000  | -1.809622000 |
| H  | -4.453517000 | 1.557390000  | -2.493454000 |
| H  | -4.107896000 | 0.544469000  | -1.091553000 |
| C  | -1.544285000 | -2.216876000 | -1.240366000 |

|   |              |              |              |
|---|--------------|--------------|--------------|
| H | -2.263278000 | -1.389067000 | -1.235236000 |
| H | -2.081170000 | -3.147149000 | -1.026696000 |
| C | -0.772278000 | -2.301392000 | -2.560778000 |
| H | -0.511336000 | -3.336747000 | -2.806897000 |
| H | 0.193780000  | -1.743201000 | -2.570054000 |
| H | -1.300097000 | -1.888674000 | -3.430945000 |
| H | -6.627634000 | -2.484726000 | -4.374514000 |
| C | 1.044556000  | -4.936417000 | -0.188273000 |
| H | 1.309273000  | -4.789846000 | -1.244924000 |
| H | 1.451953000  | -5.921601000 | 0.090544000  |
| H | -0.049451000 | -5.042095000 | -0.159092000 |

**1-Y**

|   |              |              |              |
|---|--------------|--------------|--------------|
| Y | 9.800001000  | 19.246619000 | 9.049026000  |
| C | 12.156255000 | 19.536631000 | 8.554636000  |
| H | 12.309022000 | 19.265601000 | 7.496320000  |
| H | 12.427514000 | 20.604898000 | 8.603172000  |
| C | 13.145053000 | 18.732996000 | 9.407640000  |
| H | 12.992937000 | 18.888097000 | 10.483195000 |
| H | 14.205233000 | 18.964539000 | 9.211360000  |
| H | 13.033001000 | 17.655770000 | 9.242630000  |
| C | 9.893353000  | 18.032316000 | 11.269271000 |
| H | 10.359236000 | 17.422751000 | 10.478124000 |
| H | 10.762546000 | 18.444240000 | 11.811918000 |
| C | 9.177146000  | 17.020199000 | 12.171897000 |
| H | 9.862809000  | 16.349422000 | 12.704520000 |
| H | 8.571906000  | 17.470246000 | 12.982890000 |
| H | 8.489772000  | 16.398369000 | 11.591873000 |
| C | 8.775322000  | 17.689465000 | 6.946970000  |
| C | 8.229628000  | 19.947274000 | 6.022902000  |
| C | 6.918092000  | 20.487134000 | 6.067084000  |
| C | 6.550139000  | 21.468764000 | 5.146402000  |
| H | 5.538562000  | 21.863852000 | 5.170398000  |
| C | 7.451613000  | 21.948703000 | 4.203758000  |
| H | 7.151594000  | 22.715942000 | 3.495456000  |
| C | 8.743142000  | 21.440747000 | 4.186055000  |
| H | 9.456855000  | 21.826295000 | 3.463349000  |
| C | 9.155751000  | 20.446685000 | 5.079287000  |
| C | 10.593958000 | 19.979342000 | 5.016442000  |
| H | 10.712200000 | 19.142623000 | 5.709549000  |
| C | 11.538719000 | 21.102265000 | 5.460468000  |
| H | 11.491635000 | 21.949040000 | 4.766170000  |

|   |              |              |              |
|---|--------------|--------------|--------------|
| H | 12.574641000 | 20.749663000 | 5.494061000  |
| H | 11.279781000 | 21.476108000 | 6.455654000  |
| C | 10.976472000 | 19.480329000 | 3.621919000  |
| H | 10.359698000 | 18.631398000 | 3.315977000  |
| H | 12.018177000 | 19.151906000 | 3.607458000  |
| H | 10.865660000 | 20.267630000 | 2.868525000  |
| C | 5.890853000  | 19.991317000 | 7.063312000  |
| H | 6.433047000  | 19.402974000 | 7.807910000  |
| C | 4.864978000  | 19.073941000 | 6.388520000  |
| H | 4.350272000  | 19.597347000 | 5.574665000  |
| H | 4.103865000  | 18.750998000 | 7.106435000  |
| H | 5.324184000  | 18.176762000 | 5.964126000  |
| C | 5.181164000  | 21.138217000 | 7.786593000  |
| H | 5.895077000  | 21.827025000 | 8.247110000  |
| H | 4.530634000  | 20.747226000 | 8.575690000  |
| H | 4.547794000  | 21.719197000 | 7.107361000  |
| C | 8.915274000  | 15.897972000 | 8.601810000  |
| C | 7.548498000  | 15.558515000 | 8.812522000  |
| C | 7.231202000  | 14.306272000 | 9.340966000  |
| H | 6.189985000  | 14.041996000 | 9.492509000  |
| C | 8.219258000  | 13.397755000 | 9.708695000  |
| H | 7.949400000  | 12.428967000 | 10.119458000 |
| C | 9.550389000  | 13.755716000 | 9.559791000  |
| H | 10.329394000 | 13.060209000 | 9.860593000  |
| C | 9.920988000  | 14.989086000 | 9.014521000  |
| C | 11.400284000 | 15.288861000 | 8.866841000  |
| H | 11.483139000 | 16.304033000 | 8.466805000  |
| C | 12.128859000 | 15.240661000 | 10.214567000 |
| H | 11.701365000 | 15.943196000 | 10.933901000 |
| H | 13.188185000 | 15.488804000 | 10.089633000 |
| H | 12.077116000 | 14.239483000 | 10.655993000 |
| C | 12.077171000 | 14.326255000 | 7.884302000  |
| H | 12.075808000 | 13.303599000 | 8.278270000  |
| H | 13.119739000 | 14.617333000 | 7.716072000  |
| H | 11.577838000 | 14.308673000 | 6.913326000  |
| C | 6.447040000  | 16.585855000 | 8.613441000  |
| H | 6.651783000  | 17.154314000 | 7.702017000  |
| C | 5.046008000  | 15.992359000 | 8.471104000  |
| H | 4.994716000  | 15.227209000 | 7.692703000  |
| H | 4.335540000  | 16.779906000 | 8.207080000  |
| H | 4.697907000  | 15.547589000 | 9.409542000  |
| C | 6.453538000  | 17.563038000 | 9.793396000  |

|   |              |              |              |
|---|--------------|--------------|--------------|
| H | 6.211759000  | 17.037588000 | 10.722018000 |
| H | 5.718016000  | 18.360238000 | 9.657327000  |
| H | 7.442536000  | 18.017244000 | 9.923834000  |
| C | 7.803244000  | 17.345032000 | 4.682291000  |
| H | 8.485936000  | 17.501973000 | 3.836655000  |
| H | 7.353042000  | 18.313188000 | 4.891208000  |
| C | 6.708455000  | 16.386518000 | 4.274015000  |
| C | 6.212803000  | 15.415518000 | 5.145998000  |
| H | 6.656894000  | 15.312395000 | 6.130799000  |
| C | 5.169277000  | 14.578630000 | 4.753193000  |
| H | 4.800597000  | 13.821487000 | 5.439910000  |
| C | 4.603627000  | 14.708865000 | 3.486964000  |
| H | 3.789769000  | 14.057647000 | 3.181171000  |
| C | 5.093555000  | 15.678194000 | 2.610955000  |
| H | 4.660779000  | 15.785492000 | 1.620073000  |
| C | 6.142627000  | 16.506120000 | 3.000786000  |
| H | 6.525750000  | 17.257481000 | 2.313500000  |
| C | 9.375970000  | 15.718363000 | 5.608114000  |
| H | 8.781381000  | 15.009321000 | 5.027063000  |
| H | 9.590878000  | 15.237752000 | 6.560126000  |
| C | 10.656512000 | 16.029042000 | 4.872963000  |
| C | 11.705848000 | 16.691504000 | 5.521787000  |
| H | 11.576547000 | 17.011040000 | 6.550633000  |
| C | 12.910471000 | 16.923514000 | 4.866393000  |
| H | 13.718522000 | 17.428968000 | 5.387858000  |
| C | 13.077846000 | 16.509966000 | 3.543438000  |
| H | 14.018908000 | 16.689302000 | 3.031023000  |
| C | 12.031480000 | 15.873019000 | 2.880606000  |
| H | 12.151830000 | 15.556998000 | 1.848078000  |
| C | 10.828550000 | 15.631600000 | 3.545362000  |
| H | 10.017327000 | 15.118262000 | 3.034009000  |
| N | 8.591190000  | 19.011870000 | 7.019973000  |
| N | 9.273355000  | 17.162140000 | 8.094980000  |
| N | 8.544562000  | 16.900660000 | 5.846893000  |
| Y | 8.414059000  | 19.886649000 | 12.155520000 |
| C | 6.057795000  | 19.596713000 | 12.649879000 |
| H | 5.904948000  | 19.867907000 | 13.708141000 |
| H | 5.786427000  | 18.528473000 | 12.601443000 |
| C | 5.069191000  | 20.400367000 | 11.796660000 |
| H | 5.221352000  | 20.245043000 | 10.721147000 |
| H | 4.008954000  | 20.169049000 | 11.992905000 |
| H | 5.181418000  | 21.477608000 | 11.961467000 |

|   |              |              |              |
|---|--------------|--------------|--------------|
| C | 8.320726000  | 21.100969000 | 9.935287000  |
| H | 7.854829000  | 21.710554000 | 10.726416000 |
| H | 7.451541000  | 20.689049000 | 9.392614000  |
| C | 9.036976000  | 22.113052000 | 9.032652000  |
| H | 8.351347000  | 22.783905000 | 8.500084000  |
| H | 9.642116000  | 21.662958000 | 8.221612000  |
| H | 9.724447000  | 22.734800000 | 9.612651000  |
| C | 9.438768000  | 21.443756000 | 14.257615000 |
| C | 9.984364000  | 19.185875000 | 15.181612000 |
| C | 11.295876000 | 18.645954000 | 15.137393000 |
| C | 11.663785000 | 17.664246000 | 16.058005000 |
| H | 12.675343000 | 17.269113000 | 16.033974000 |
| C | 10.762292000 | 17.184292000 | 17.000626000 |
| H | 11.062278000 | 16.416995000 | 17.708878000 |
| C | 9.470796000  | 17.692330000 | 17.018382000 |
| H | 8.757073000  | 17.306788000 | 17.741082000 |
| C | 9.058234000  | 18.686477000 | 16.125220000 |
| C | 7.620071000  | 19.153962000 | 16.188150000 |
| H | 7.501838000  | 19.990591000 | 15.494932000 |
| C | 6.675157000  | 18.031061000 | 15.744398000 |
| H | 6.722254000  | 17.184380000 | 16.438811000 |
| H | 5.639260000  | 18.383741000 | 15.710872000 |
| H | 6.933956000  | 17.657063000 | 14.749236000 |
| C | 7.237763000  | 19.653233000 | 17.582632000 |
| H | 7.854650000  | 20.502162000 | 17.888353000 |
| H | 6.196090000  | 19.981751000 | 17.597158000 |
| H | 7.348589000  | 18.866055000 | 18.336152000 |
| C | 12.323159000 | 19.141794000 | 14.141226000 |
| H | 11.781023000 | 19.730232000 | 13.396661000 |
| C | 13.349078000 | 20.059053000 | 14.816110000 |
| H | 13.863660000 | 19.535591000 | 15.630008000 |
| H | 14.110289000 | 20.381903000 | 14.098260000 |
| H | 12.889943000 | 20.956291000 | 15.240461000 |
| C | 13.032801000 | 17.994895000 | 13.417883000 |
| H | 12.318869000 | 17.306143000 | 12.957314000 |
| H | 13.683364000 | 18.385899000 | 12.628818000 |
| H | 13.666128000 | 17.413845000 | 14.097097000 |
| C | 9.298777000  | 23.235322000 | 12.602874000 |
| C | 10.665543000 | 23.574864000 | 12.392244000 |
| C | 10.982796000 | 24.827141000 | 11.863859000 |
| H | 12.024005000 | 25.091477000 | 11.712362000 |
| C | 9.994704000  | 25.735624000 | 11.496134000 |



|   |              |              |              |
|---|--------------|--------------|--------------|
| H | 10.264532000 | 26.704446000 | 11.085431000 |
| C | 8.663586000  | 25.377597000 | 11.644992000 |
| H | 7.884558000  | 26.073089000 | 11.344211000 |
| C | 8.293031000  | 24.144179000 | 12.190191000 |
| C | 6.813747000  | 23.844337000 | 12.337883000 |
| H | 6.730939000  | 22.829174000 | 12.737957000 |
| C | 6.085158000  | 23.892443000 | 10.990161000 |
| H | 6.512714000  | 23.189934000 | 10.270837000 |
| H | 5.025855000  | 23.644204000 | 11.115111000 |
| H | 6.136797000  | 24.893614000 | 10.548708000 |
| C | 6.136819000  | 24.806944000 | 13.320387000 |
| H | 6.138162000  | 25.829587000 | 12.926390000 |
| H | 5.094257000  | 24.515839000 | 13.488608000 |
| H | 6.636138000  | 24.824565000 | 14.291371000 |
| C | 11.767019000 | 22.547559000 | 12.591353000 |
| H | 11.562319000 | 21.979165000 | 13.502828000 |
| C | 13.168051000 | 23.141082000 | 12.733563000 |
| H | 13.219389000 | 23.906242000 | 13.511950000 |
| H | 13.878564000 | 22.353557000 | 12.997534000 |
| H | 13.516048000 | 23.585853000 | 11.795088000 |
| C | 11.760442000 | 21.570297000 | 11.411466000 |
| H | 12.002279000 | 22.095684000 | 10.482825000 |
| H | 12.495895000 | 20.773038000 | 11.547585000 |
| H | 10.771398000 | 21.116179000 | 11.281053000 |
| C | 10.411008000 | 21.788238000 | 16.522229000 |
| H | 9.728397000  | 21.631444000 | 17.367956000 |
| H | 10.861117000 | 20.820027000 | 16.313371000 |
| C | 11.505901000 | 22.746727000 | 16.930292000 |
| C | 12.001385000 | 23.717751000 | 16.058241000 |
| H | 11.557119000 | 23.820899000 | 15.073522000 |
| C | 13.044987000 | 24.554631000 | 16.450871000 |
| H | 13.413533000 | 25.311794000 | 15.764105000 |
| C | 13.610895000 | 24.424352000 | 17.716980000 |
| H | 14.424811000 | 25.075562000 | 18.022634000 |
| C | 13.121144000 | 23.454990000 | 18.593050000 |
| H | 13.554124000 | 23.347651000 | 19.583838000 |
| C | 12.071994000 | 22.627079000 | 18.203401000 |
| H | 11.689014000 | 21.875696000 | 18.890744000 |
| C | 8.838164000  | 23.414847000 | 15.596497000 |
| H | 9.432749000  | 24.123921000 | 16.177515000 |
| H | 8.623210000  | 23.895429000 | 14.644482000 |
| C | 7.557668000  | 23.104125000 | 16.331705000 |

|   |             |              |              |
|---|-------------|--------------|--------------|
| C | 6.508336000 | 22.441596000 | 15.682953000 |
| H | 6.637595000 | 22.122037000 | 14.654109000 |
| C | 5.303762000 | 22.209532000 | 16.338421000 |
| H | 4.495706000 | 21.704032000 | 15.817009000 |
| C | 5.136431000 | 22.623102000 | 17.661374000 |
| H | 4.195404000 | 22.443722000 | 18.173837000 |
| C | 6.182804000 | 23.260107000 | 18.324144000 |
| H | 6.062496000 | 23.576140000 | 19.356672000 |
| C | 7.385684000 | 23.501571000 | 17.659317000 |
| H | 8.196902000 | 24.014982000 | 18.170605000 |
| N | 9.622839000 | 20.121349000 | 14.184605000 |
| N | 8.940730000 | 21.971111000 | 13.109619000 |
| N | 9.669582000 | 22.232562000 | 15.357686000 |

**2-Y**

|    |              |              |              |
|----|--------------|--------------|--------------|
| Y  | 7.857263000  | 5.903980000  | 7.686465000  |
| Al | 8.753013000  | 8.449649000  | 6.374786000  |
| N  | 7.361031000  | 5.420710000  | 9.897779000  |
| N  | 5.819132000  | 4.944499000  | 8.355138000  |
| N  | 5.477876000  | 4.140105000  | 10.609103000 |
| C  | 9.433452000  | 4.309819000  | 6.838010000  |
| H  | 9.119608000  | 4.050077000  | 5.812295000  |
| H  | 10.354536000 | 4.902871000  | 6.690494000  |
| C  | 9.793859000  | 3.024523000  | 7.589072000  |
| H  | 10.270210000 | 3.240782000  | 8.552782000  |
| H  | 10.491756000 | 2.370031000  | 7.042641000  |
| H  | 8.909456000  | 2.415145000  | 7.809433000  |
| C  | 6.906426000  | 7.502311000  | 5.926822000  |
| H  | 6.654242000  | 8.384228000  | 5.322502000  |
| H  | 6.099030000  | 7.508962000  | 6.681417000  |
| C  | 6.750292000  | 6.275544000  | 5.012904000  |
| H  | 7.455054000  | 6.320907000  | 4.177877000  |
| H  | 6.942179000  | 5.296864000  | 5.492459000  |
| H  | 5.737789000  | 6.175004000  | 4.606229000  |
| C  | 8.336913000  | 10.395197000 | 6.396428000  |
| H  | 9.244372000  | 10.974391000 | 6.619157000  |
| H  | 8.058327000  | 10.688530000 | 5.371858000  |
| C  | 7.219360000  | 10.799099000 | 7.363356000  |
| H  | 6.285779000  | 10.263112000 | 7.149315000  |
| H  | 6.980936000  | 11.871924000 | 7.332055000  |
| H  | 7.483685000  | 10.565089000 | 8.401304000  |
| C  | 10.060078000 | 7.745719000  | 5.035381000  |

|   |              |             |             |
|---|--------------|-------------|-------------|
| H | 9.934152000  | 6.656506000 | 4.936315000 |
| H | 9.793279000  | 8.151872000 | 4.046869000 |
| C | 11.535241000 | 8.046039000 | 5.326283000 |
| H | 11.726208000 | 9.124816000 | 5.390788000 |
| H | 12.215948000 | 7.649734000 | 4.559385000 |
| H | 11.853150000 | 7.610402000 | 6.281948000 |
| C | 9.411265000  | 7.835839000 | 8.278485000 |
| H | 10.048402000 | 6.930509000 | 8.241625000 |
| H | 8.702296000  | 7.673341000 | 9.112396000 |
| C | 10.312787000 | 8.988786000 | 8.742008000 |
| H | 11.078900000 | 9.228960000 | 7.997663000 |
| H | 10.829927000 | 8.751502000 | 9.680281000 |
| H | 9.729224000  | 9.898601000 | 8.910539000 |
| C | 6.174356000  | 4.813257000 | 9.639519000 |
| C | 4.731600000  | 4.402877000 | 7.634674000 |
| C | 3.641188000  | 5.257869000 | 7.336279000 |
| C | 2.581333000  | 4.767441000 | 6.572699000 |
| H | 1.735770000  | 5.416055000 | 6.360674000 |
| C | 2.590292000  | 3.466825000 | 6.080936000 |
| H | 1.758435000  | 3.098112000 | 5.487414000 |
| C | 3.680094000  | 2.647496000 | 6.346023000 |
| H | 3.698454000  | 1.638366000 | 5.943940000 |
| C | 4.760548000  | 3.090921000 | 7.114771000 |
| C | 5.943899000  | 2.167299000 | 7.318214000 |
| H | 6.619447000  | 2.639381000 | 8.038098000 |
| C | 5.539341000  | 0.806621000 | 7.887789000 |
| H | 5.057895000  | 0.902168000 | 8.865060000 |
| H | 6.421211000  | 0.174678000 | 8.019002000 |
| H | 4.849698000  | 0.278647000 | 7.220516000 |
| C | 6.701400000  | 1.989343000 | 5.996909000 |
| H | 6.063303000  | 1.511272000 | 5.245270000 |
| H | 7.588084000  | 1.362651000 | 6.134932000 |
| H | 7.029115000  | 2.949668000 | 5.588088000 |
| C | 3.590803000  | 6.677352000 | 7.863551000 |
| H | 4.585472000  | 6.900124000 | 8.258003000 |
| C | 2.592389000  | 6.808597000 | 9.018320000 |
| H | 1.580027000  | 6.544900000 | 8.692155000 |
| H | 2.563692000  | 7.838380000 | 9.390980000 |
| H | 2.846219000  | 6.154853000 | 9.857546000 |
| C | 3.277109000  | 7.699660000 | 6.767988000 |
| H | 3.938884000  | 7.581278000 | 5.905310000 |
| H | 3.401481000  | 8.718161000 | 7.152383000 |

|   |              |              |              |
|---|--------------|--------------|--------------|
| H | 2.244881000  | 7.611516000  | 6.411914000  |
| C | 7.728346000  | 6.036466000  | 11.110415000 |
| C | 6.917987000  | 7.042397000  | 11.699687000 |
| C | 7.365285000  | 7.671591000  | 12.862672000 |
| H | 6.749811000  | 8.439220000  | 13.319935000 |
| C | 8.593427000  | 7.357425000  | 13.437345000 |
| H | 8.920466000  | 7.864216000  | 14.340788000 |
| C | 9.397466000  | 6.399525000  | 12.836096000 |
| H | 10.362052000 | 6.153620000  | 13.272347000 |
| C | 8.987088000  | 5.730592000  | 11.680009000 |
| C | 9.892859000  | 4.677811000  | 11.077030000 |
| H | 9.372656000  | 4.279748000  | 10.201067000 |
| C | 10.140476000 | 3.522560000  | 12.052047000 |
| H | 10.715194000 | 3.858043000  | 12.922478000 |
| H | 10.709307000 | 2.721635000  | 11.567369000 |
| H | 9.204079000  | 3.091849000  | 12.416553000 |
| C | 11.223199000 | 5.271309000  | 10.604171000 |
| H | 11.070146000 | 6.085844000  | 9.890755000  |
| H | 11.838088000 | 4.505628000  | 10.118373000 |
| H | 11.798195000 | 5.674422000  | 11.445153000 |
| C | 5.646428000  | 7.523955000  | 11.022824000 |
| H | 5.139170000  | 6.662873000  | 10.578691000 |
| C | 4.652972000  | 8.190272000  | 11.975571000 |
| H | 5.001537000  | 9.175565000  | 12.303732000 |
| H | 4.475401000  | 7.585988000  | 12.870461000 |
| H | 3.694233000  | 8.341082000  | 11.470844000 |
| C | 5.998830000  | 8.493627000  | 9.889631000  |
| H | 6.544908000  | 9.356613000  | 10.283520000 |
| H | 5.099887000  | 8.861209000  | 9.385009000  |
| H | 6.638668000  | 8.024131000  | 9.135203000  |
| C | 6.199186000  | 3.501085000  | 11.715628000 |
| H | 5.552950000  | 3.530908000  | 12.595741000 |
| H | 7.083492000  | 4.088639000  | 11.950396000 |
| C | 6.583940000  | 2.077049000  | 11.400321000 |
| C | 5.916762000  | 1.003132000  | 11.993096000 |
| H | 5.100719000  | 1.200097000  | 12.683837000 |
| C | 6.294965000  | -0.309749000 | 11.709694000 |
| H | 5.768737000  | -1.136937000 | 12.178015000 |
| C | 7.350408000  | -0.558601000 | 10.834974000 |
| H | 7.651898000  | -1.580049000 | 10.620819000 |
| C | 8.017191000  | 0.509212000  | 10.232296000 |
| H | 8.840273000  | 0.324683000  | 9.547594000  |

|   |             |             |              |
|---|-------------|-------------|--------------|
| C | 7.628422000 | 1.816063000 | 10.507014000 |
| H | 8.146412000 | 2.645884000 | 10.038181000 |
| C | 4.158795000 | 3.565965000 | 10.362294000 |
| H | 4.247475000 | 2.532004000 | 10.008862000 |
| H | 3.679615000 | 4.129370000 | 9.564704000  |
| C | 3.272671000 | 3.605601000 | 11.580807000 |
| C | 2.513292000 | 2.487292000 | 11.929685000 |
| H | 2.600898000 | 1.578445000 | 11.339363000 |
| C | 1.651685000 | 2.529877000 | 13.025398000 |
| H | 1.065878000 | 1.652839000 | 13.286183000 |
| C | 1.548978000 | 3.691481000 | 13.788169000 |
| H | 0.881939000 | 3.724828000 | 14.644854000 |
| C | 2.309603000 | 4.810791000 | 13.448288000 |
| H | 2.235746000 | 5.719761000 | 14.038848000 |
| C | 3.164559000 | 4.766877000 | 12.351047000 |
| H | 3.767292000 | 5.630210000 | 12.090650000 |

**TS-5**

|    |              |              |              |
|----|--------------|--------------|--------------|
| Y  | 7.880415000  | 6.141682000  | 7.949283000  |
| Al | 8.834056000  | 8.418539000  | 6.248717000  |
| N  | 7.283193000  | 5.481645000  | 10.095743000 |
| N  | 5.797274000  | 4.992184000  | 8.491913000  |
| N  | 5.446429000  | 4.082347000  | 10.697606000 |
| C  | 9.750229000  | 4.488810000  | 7.338557000  |
| H  | 10.628423000 | 4.251456000  | 7.951334000  |
| H  | 8.991885000  | 3.755622000  | 7.662539000  |
| C  | 10.073355000 | 4.303043000  | 5.858095000  |
| H  | 9.219203000  | 4.525491000  | 5.207723000  |
| H  | 10.393127000 | 3.280432000  | 5.621818000  |
| H  | 10.879844000 | 4.978076000  | 5.553588000  |
| C  | 6.876129000  | 7.566284000  | 6.069596000  |
| H  | 6.617785000  | 8.447373000  | 5.465937000  |
| H  | 6.097172000  | 7.608721000  | 6.854070000  |
| C  | 6.654301000  | 6.322068000  | 5.190657000  |
| H  | 7.305894000  | 6.352241000  | 4.312811000  |
| H  | 6.872980000  | 5.356373000  | 5.686354000  |
| H  | 5.618936000  | 6.210719000  | 4.848351000  |
| C  | 8.588295000  | 10.363600000 | 6.632904000  |
| H  | 9.581698000  | 10.832910000 | 6.702007000  |
| H  | 8.108171000  | 10.844871000 | 5.766223000  |
| C  | 7.792583000  | 10.685680000 | 7.900559000  |
| H  | 6.771119000  | 10.287221000 | 7.848189000  |

|   |              |              |             |
|---|--------------|--------------|-------------|
| H | 7.696792000  | 11.763721000 | 8.098313000 |
| H | 8.261483000  | 10.244739000 | 8.789674000 |
| C | 9.668423000  | 8.014450000  | 4.472260000 |
| H | 10.008335000 | 6.969219000  | 4.431770000 |
| H | 8.884617000  | 8.090434000  | 3.701256000 |
| C | 10.825845000 | 8.944092000  | 4.086693000 |
| H | 10.507307000 | 9.993762000  | 4.070983000 |
| H | 11.247213000 | 8.725481000  | 3.094470000 |
| H | 11.655096000 | 8.882302000  | 4.801946000 |
| C | 9.805000000  | 7.375205000  | 7.758240000 |
| H | 9.831271000  | 5.837775000  | 7.597791000 |
| H | 9.495713000  | 7.718125000  | 8.780317000 |
| C | 11.298861000 | 7.634623000  | 7.598658000 |
| H | 11.643271000 | 7.302034000  | 6.612210000 |
| H | 11.904011000 | 7.091124000  | 8.340758000 |
| H | 11.577777000 | 8.694355000  | 7.686520000 |
| C | 6.133592000  | 4.826682000  | 9.771353000 |
| C | 4.785363000  | 4.393138000  | 7.717354000 |
| C | 3.699034000  | 5.209294000  | 7.313299000 |
| C | 2.732020000  | 4.678961000  | 6.458598000 |
| H | 1.890729000  | 5.298002000  | 6.159749000 |
| C | 2.828567000  | 3.376303000  | 5.981682000 |
| H | 2.070823000  | 2.979164000  | 5.312172000 |
| C | 3.906046000  | 2.588300000  | 6.367678000 |
| H | 3.988015000  | 1.574975000  | 5.985093000 |
| C | 4.891682000  | 3.070186000  | 7.233400000 |
| C | 6.067102000  | 2.181916000  | 7.587237000 |
| H | 6.598800000  | 2.642546000  | 8.424938000 |
| C | 5.639873000  | 0.784691000  | 8.038390000 |
| H | 5.000271000  | 0.823710000  | 8.924518000 |
| H | 6.516764000  | 0.185129000  | 8.293106000 |
| H | 5.094549000  | 0.252612000  | 7.251887000 |
| C | 7.034385000  | 2.086666000  | 6.401137000 |
| H | 6.560702000  | 1.575158000  | 5.555710000 |
| H | 7.936652000  | 1.526984000  | 6.671107000 |
| H | 7.340317000  | 3.075578000  | 6.045433000 |
| C | 3.552874000  | 6.625295000  | 7.834541000 |
| H | 4.523410000  | 6.906328000  | 8.253736000 |
| C | 2.526116000  | 6.695595000  | 8.970644000 |
| H | 1.542122000  | 6.353692000  | 8.630437000 |
| H | 2.414612000  | 7.724956000  | 9.328565000 |
| H | 2.812191000  | 6.075561000  | 9.825390000 |

|   |              |              |              |
|---|--------------|--------------|--------------|
| C | 3.203473000  | 7.628536000  | 6.733499000  |
| H | 3.894153000  | 7.553112000  | 5.888881000  |
| H | 3.254224000  | 8.651897000  | 7.121137000  |
| H | 2.187954000  | 7.478775000  | 6.351047000  |
| C | 7.554544000  | 6.060111000  | 11.352673000 |
| C | 6.684772000  | 7.029380000  | 11.917919000 |
| C | 7.027569000  | 7.607270000  | 13.141346000 |
| H | 6.365213000  | 8.343860000  | 13.584320000 |
| C | 8.212804000  | 7.281767000  | 13.794704000 |
| H | 8.459983000  | 7.749978000  | 14.743199000 |
| C | 9.080593000  | 6.366700000  | 13.214222000 |
| H | 10.014485000 | 6.121305000  | 13.712514000 |
| C | 8.771269000  | 5.744533000  | 12.001732000 |
| C | 9.743553000  | 4.749731000  | 11.400417000 |
| H | 9.233854000  | 4.293299000  | 10.545508000 |
| C | 10.120173000 | 3.637016000  | 12.381788000 |
| H | 10.697352000 | 4.025404000  | 13.227790000 |
| H | 10.737070000 | 2.879541000  | 11.885894000 |
| H | 9.234956000  | 3.135892000  | 12.784589000 |
| C | 10.992850000 | 5.458214000  | 10.866635000 |
| H | 10.731026000 | 6.220525000  | 10.127387000 |
| H | 11.674412000 | 4.743786000  | 10.391692000 |
| H | 11.540204000 | 5.954259000  | 11.676128000 |
| C | 5.467276000  | 7.529123000  | 11.159193000 |
| H | 5.010612000  | 6.685152000  | 10.633516000 |
| C | 4.389171000  | 8.152358000  | 12.047708000 |
| H | 4.700984000  | 9.128400000  | 12.434777000 |
| H | 4.139026000  | 7.521086000  | 12.904823000 |
| H | 3.474182000  | 8.312120000  | 11.470173000 |
| C | 5.897530000  | 8.560647000  | 10.109893000 |
| H | 6.326177000  | 9.443807000  | 10.594364000 |
| H | 5.049623000  | 8.884931000  | 9.498600000  |
| H | 6.668843000  | 8.174047000  | 9.435660000  |
| C | 6.148050000  | 3.436121000  | 11.812132000 |
| H | 5.499986000  | 3.486668000  | 12.690472000 |
| H | 7.042181000  | 4.007420000  | 12.044457000 |
| C | 6.505649000  | 1.998912000  | 11.524222000 |
| C | 5.702531000  | 0.955551000  | 11.992325000 |
| H | 4.806871000  | 1.189065000  | 12.562940000 |
| C | 6.049094000  | -0.372470000 | 11.744936000 |
| H | 5.416962000  | -1.174166000 | 12.116536000 |
| C | 7.209941000  | -0.670225000 | 11.033955000 |

|   |             |              |              |
|---|-------------|--------------|--------------|
| H | 7.487499000 | -1.704444000 | 10.851412000 |
| C | 8.013981000 | 0.365188000  | 10.556154000 |
| H | 8.920736000 | 0.140623000  | 10.001253000 |
| C | 7.656580000 | 1.689507000  | 10.792093000 |
| H | 8.282040000 | 2.495422000  | 10.421823000 |
| C | 4.128983000 | 3.528415000  | 10.421982000 |
| H | 4.209395000 | 2.483816000  | 10.098719000 |
| H | 3.690374000 | 4.075658000  | 9.590263000  |
| C | 3.187470000 | 3.621703000  | 11.595945000 |
| C | 2.218999000 | 2.632818000  | 11.784530000 |
| H | 2.193001000 | 1.776013000  | 11.115189000 |
| C | 1.289314000 | 2.741604000  | 12.817190000 |
| H | 0.538973000 | 1.967423000  | 12.951547000 |
| C | 1.325859000 | 3.836150000  | 13.679930000 |
| H | 0.604410000 | 3.918724000  | 14.487738000 |
| C | 2.298376000 | 4.820044000  | 13.504289000 |
| H | 2.339090000 | 5.672489000  | 14.176787000 |
| C | 3.221350000 | 4.712470000  | 12.467398000 |
| H | 3.989771000 | 5.466344000  | 12.334733000 |

### Int-9

|    |              |              |              |
|----|--------------|--------------|--------------|
| Y  | 7.369801000  | 6.738781000  | 7.996196000  |
| Al | 9.113437000  | 8.270713000  | 6.233447000  |
| N  | 7.046416000  | 5.860565000  | 10.141873000 |
| N  | 5.676988000  | 5.212726000  | 8.504408000  |
| N  | 5.372721000  | 4.239542000  | 10.693455000 |
| C  | 6.954929000  | 8.549542000  | 6.267874000  |
| H  | 7.092975000  | 9.526339000  | 5.785436000  |
| H  | 6.272860000  | 8.823583000  | 7.102668000  |
| C  | 6.215755000  | 7.617711000  | 5.294292000  |
| H  | 6.823387000  | 7.438884000  | 4.401959000  |
| H  | 6.000703000  | 6.614455000  | 5.705556000  |
| H  | 5.243126000  | 8.003690000  | 4.967332000  |
| C  | 9.748794000  | 9.576289000  | 7.630262000  |
| H  | 10.807628000 | 9.382702000  | 7.857625000  |
| H  | 9.717179000  | 10.604168000 | 7.238768000  |
| C  | 8.943896000  | 9.527565000  | 8.933267000  |
| H  | 7.892646000  | 9.802188000  | 8.771419000  |
| H  | 9.311174000  | 10.197017000 | 9.724781000  |
| H  | 8.965680000  | 8.527657000  | 9.403722000  |
| C  | 9.634394000  | 8.619397000  | 4.337945000  |
| H  | 9.247886000  | 7.822623000  | 3.686077000  |



|   |              |             |              |
|---|--------------|-------------|--------------|
| H | 9.168301000  | 9.549148000 | 3.977217000  |
| C | 11.156277000 | 8.717154000 | 4.168270000  |
| H | 11.575935000 | 9.534221000 | 4.769057000  |
| H | 11.467345000 | 8.895471000 | 3.128559000  |
| H | 11.659317000 | 7.798332000 | 4.495862000  |
| C | 9.288927000  | 6.318301000 | 6.853025000  |
| H | 10.110161000 | 6.272601000 | 7.595730000  |
| C | 9.604012000  | 5.390497000 | 5.674750000  |
| H | 8.770261000  | 5.341762000 | 4.959970000  |
| H | 9.791152000  | 4.352730000 | 5.990188000  |
| H | 10.483259000 | 5.688723000 | 5.081075000  |
| C | 6.004358000  | 5.069315000 | 9.800097000  |
| C | 4.823341000  | 4.472765000 | 7.663342000  |
| C | 3.711422000  | 5.152343000 | 7.107067000  |
| C | 2.906527000  | 4.486710000 | 6.180231000  |
| H | 2.048390000  | 4.996405000 | 5.753701000  |
| C | 3.185250000  | 3.179859000 | 5.796646000  |
| H | 2.550323000  | 2.674675000 | 5.074249000  |
| C | 4.280841000  | 2.521866000 | 6.345030000  |
| H | 4.492251000  | 1.501370000 | 6.042943000  |
| C | 5.116068000  | 3.145463000 | 7.274409000  |
| C | 6.321731000  | 2.422331000 | 7.839874000  |
| H | 6.467929000  | 2.771478000 | 8.865540000  |
| C | 6.144901000  | 0.907262000 | 7.913386000  |
| H | 5.222508000  | 0.632053000 | 8.435679000  |
| H | 6.979413000  | 0.463414000 | 8.462006000  |
| H | 6.124767000  | 0.445084000 | 6.920379000  |
| C | 7.586051000  | 2.784551000 | 7.055404000  |
| H | 7.492730000  | 2.490954000 | 6.004199000  |
| H | 8.462840000  | 2.277676000 | 7.473631000  |
| H | 7.786855000  | 3.860503000 | 7.086430000  |
| C | 3.361698000  | 6.554415000 | 7.569990000  |
| H | 4.306591000  | 7.072374000 | 7.776696000  |
| C | 2.588255000  | 6.500455000 | 8.892685000  |
| H | 1.664282000  | 5.923754000 | 8.776271000  |
| H | 2.316775000  | 7.506469000 | 9.230593000  |
| H | 3.177952000  | 6.028780000 | 9.681144000  |
| C | 2.592671000  | 7.378919000 | 6.539886000  |
| H | 3.070114000  | 7.352686000 | 5.556307000  |
| H | 2.539101000  | 8.423944000 | 6.862833000  |
| H | 1.562004000  | 7.026419000 | 6.423491000  |
| C | 7.355643000  | 6.411498000 | 11.399164000 |

|   |              |              |              |
|---|--------------|--------------|--------------|
| C | 6.443385000  | 7.258004000  | 12.080692000 |
| C | 6.842657000  | 7.858149000  | 13.275361000 |
| H | 6.147355000  | 8.502360000  | 13.804038000 |
| C | 8.120362000  | 7.666367000  | 13.793386000 |
| H | 8.411398000  | 8.147461000  | 14.722750000 |
| C | 9.020150000  | 6.863216000  | 13.105351000 |
| H | 10.022177000 | 6.719031000  | 13.500332000 |
| C | 8.661459000  | 6.227066000  | 11.914089000 |
| C | 9.674327000  | 5.353802000  | 11.199507000 |
| H | 9.150814000  | 4.875667000  | 10.364816000 |
| C | 10.229450000 | 4.257672000  | 12.114086000 |
| H | 10.842808000 | 4.681166000  | 12.916937000 |
| H | 10.864482000 | 3.568355000  | 11.546923000 |
| H | 9.430497000  | 3.673396000  | 12.579193000 |
| C | 10.817347000 | 6.190561000  | 10.614017000 |
| H | 10.451382000 | 6.965584000  | 9.933946000  |
| H | 11.515259000 | 5.558747000  | 10.054249000 |
| H | 11.380775000 | 6.693719000  | 11.407955000 |
| C | 5.092847000  | 7.587051000  | 11.473134000 |
| H | 4.731010000  | 6.694385000  | 10.957257000 |
| C | 4.030330000  | 7.985550000  | 12.497716000 |
| H | 4.229575000  | 8.972568000  | 12.928787000 |
| H | 3.972426000  | 7.267717000  | 13.321678000 |
| H | 3.046762000  | 8.037726000  | 12.019317000 |
| C | 5.239324000  | 8.693017000  | 10.423091000 |
| H | 5.623850000  | 9.613183000  | 10.875325000 |
| H | 4.282130000  | 8.916534000  | 9.941258000  |
| H | 5.944472000  | 8.400001000  | 9.638281000  |
| C | 6.063925000  | 3.745354000  | 11.890487000 |
| H | 5.365530000  | 3.795969000  | 12.730036000 |
| H | 6.890079000  | 4.411821000  | 12.121722000 |
| C | 6.572597000  | 2.333434000  | 11.727385000 |
| C | 5.905151000  | 1.256572000  | 12.315074000 |
| H | 5.005951000  | 1.441555000  | 12.896683000 |
| C | 6.381841000  | -0.044677000 | 12.158426000 |
| H | 5.851289000  | -0.873292000 | 12.619258000 |
| C | 7.539924000  | -0.280288000 | 11.420663000 |
| H | 7.916430000  | -1.292601000 | 11.304704000 |
| C | 8.215615000  | 0.790084000  | 10.833084000 |
| H | 9.122886000  | 0.615924000  | 10.261497000 |
| C | 7.729218000  | 2.086064000  | 10.980605000 |
| H | 8.252286000  | 2.917159000  | 10.518409000 |

|   |             |             |              |
|---|-------------|-------------|--------------|
| C | 4.180026000 | 3.475301000 | 10.343118000 |
| H | 4.455973000 | 2.454598000 | 10.051624000 |
| H | 3.715105000 | 3.934403000 | 9.473277000  |
| C | 3.163964000 | 3.417591000 | 11.455515000 |
| C | 2.491554000 | 2.222462000 | 11.719193000 |
| H | 2.743955000 | 1.332437000 | 11.148004000 |
| C | 1.510049000 | 2.163842000 | 12.707541000 |
| H | 0.994629000 | 1.227357000 | 12.901644000 |
| C | 1.196603000 | 3.301487000 | 13.449378000 |
| H | 0.436416000 | 3.256312000 | 14.224027000 |
| C | 1.868350000 | 4.497262000 | 13.194856000 |
| H | 1.632324000 | 5.388552000 | 13.769662000 |
| C | 2.842588000 | 4.553485000 | 12.202378000 |
| H | 3.372706000 | 5.478927000 | 12.009104000 |

**3-Y**

|    |              |              |              |
|----|--------------|--------------|--------------|
| Y  | 12.503787000 | 9.279139000  | 12.700257000 |
| Y  | 14.836305000 | 12.055579000 | 14.819846000 |
| Al | 11.816924000 | 12.018235000 | 13.848269000 |
| Al | 14.865812000 | 9.062577000  | 14.651615000 |
| N  | 12.502074000 | 8.576138000  | 10.450283000 |
| N  | 11.494258000 | 7.211369000  | 11.913352000 |
| N  | 11.221408000 | 6.706310000  | 9.598767000  |
| N  | 16.874836000 | 12.957654000 | 13.957509000 |
| N  | 15.875522000 | 14.035034000 | 15.630943000 |
| N  | 17.876852000 | 15.008335000 | 14.775184000 |
| C  | 13.525584000 | 11.447510000 | 12.949893000 |
| H  | 13.642709000 | 12.019584000 | 12.022626000 |
| C  | 14.569575000 | 10.346769000 | 13.156075000 |
| H  | 15.353707000 | 10.295516000 | 12.391067000 |
| C  | 11.740638000 | 7.480797000  | 10.612075000 |
| C  | 12.876911000 | 9.273142000  | 9.277526000  |
| C  | 11.981148000 | 10.126463000 | 8.595278000  |
| C  | 12.438375000 | 10.853373000 | 7.493520000  |
| H  | 11.751011000 | 11.515155000 | 6.974639000  |
| C  | 13.751079000 | 10.750232000 | 7.052036000  |
| H  | 14.086824000 | 11.318358000 | 6.189030000  |
| C  | 14.631683000 | 9.918783000  | 7.732936000  |
| H  | 15.659458000 | 9.838758000  | 7.392999000  |
| C  | 14.225282000 | 9.185091000  | 8.849506000  |
| C  | 10.557975000 | 10.325268000 | 9.066486000  |
| H  | 10.314410000 | 9.515801000  | 9.760852000  |

|   |              |              |              |
|---|--------------|--------------|--------------|
| C | 9.527921000  | 10.277478000 | 7.938742000  |
| H | 9.671576000  | 11.090066000 | 7.218758000  |
| H | 8.519516000  | 10.377136000 | 8.347496000  |
| H | 9.568145000  | 9.331463000  | 7.391295000  |
| C | 10.467384000 | 11.650449000 | 9.826591000  |
| H | 11.183367000 | 11.686171000 | 10.654002000 |
| H | 9.462959000  | 11.807354000 | 10.231522000 |
| H | 10.701624000 | 12.492634000 | 9.165817000  |
| C | 15.211424000 | 8.256717000  | 9.530803000  |
| H | 14.814720000 | 8.045199000  | 10.528163000 |
| C | 16.599485000 | 8.875530000  | 9.695606000  |
| H | 17.063039000 | 9.109412000  | 8.731168000  |
| H | 17.269246000 | 8.178133000  | 10.206795000 |
| H | 16.566038000 | 9.794204000  | 10.284885000 |
| C | 15.308518000 | 6.929532000  | 8.769255000  |
| H | 15.677451000 | 7.093664000  | 7.750176000  |
| H | 14.340864000 | 6.426803000  | 8.689232000  |
| H | 16.002211000 | 6.245042000  | 9.269252000  |
| C | 11.349805000 | 5.931020000  | 12.472208000 |
| C | 12.307077000 | 4.902049000  | 12.248671000 |
| C | 12.141735000 | 3.670027000  | 12.882826000 |
| H | 12.869888000 | 2.884538000  | 12.708841000 |
| C | 11.085406000 | 3.429773000  | 13.756794000 |
| H | 10.981426000 | 2.462902000  | 14.241005000 |
| C | 10.180588000 | 4.450047000  | 14.010889000 |
| H | 9.360401000  | 4.283308000  | 14.704543000 |
| C | 10.293890000 | 5.694996000  | 13.386969000 |
| C | 13.570345000 | 5.168817000  | 11.452106000 |
| H | 13.316972000 | 5.781748000  | 10.583965000 |
| C | 14.549883000 | 5.969487000  | 12.311513000 |
| H | 14.113638000 | 6.919909000  | 12.636302000 |
| H | 15.469520000 | 6.189920000  | 11.763925000 |
| H | 14.816599000 | 5.406292000  | 13.210610000 |
| C | 14.262771000 | 3.909297000  | 10.930420000 |
| H | 14.738100000 | 3.343235000  | 11.739051000 |
| H | 15.050883000 | 4.183390000  | 10.222769000 |
| H | 13.568469000 | 3.235770000  | 10.418281000 |
| C | 9.274697000  | 6.765873000  | 13.711695000 |
| H | 9.543280000  | 7.643504000  | 13.118282000 |
| C | 9.325020000  | 7.157680000  | 15.192522000 |
| H | 9.008507000  | 6.325043000  | 15.831014000 |
| H | 8.658409000  | 8.003616000  | 15.395056000 |

|   |              |              |              |
|---|--------------|--------------|--------------|
| H | 10.336857000 | 7.437306000  | 15.500898000 |
| C | 7.855166000  | 6.342783000  | 13.321599000 |
| H | 7.795584000  | 6.043475000  | 12.271994000 |
| H | 7.148478000  | 7.166210000  | 13.476050000 |
| H | 7.514169000  | 5.496751000  | 13.928806000 |
| C | 9.960299000  | 5.984996000  | 9.801953000  |
| H | 9.881254000  | 5.696005000  | 10.847059000 |
| H | 10.005524000 | 5.062679000  | 9.218122000  |
| C | 8.757658000  | 6.796982000  | 9.391195000  |
| C | 8.094766000  | 6.550187000  | 8.186991000  |
| H | 8.458316000  | 5.762524000  | 7.531486000  |
| C | 6.972589000  | 7.298885000  | 7.830232000  |
| H | 6.462598000  | 7.096064000  | 6.892490000  |
| C | 6.501947000  | 8.299678000  | 8.677850000  |
| H | 5.623530000  | 8.877513000  | 8.404596000  |
| C | 7.165047000  | 8.559680000  | 9.878270000  |
| H | 6.806191000  | 9.340314000  | 10.543398000 |
| C | 8.287804000  | 7.815806000  | 10.226279000 |
| H | 8.804577000  | 8.010108000  | 11.159511000 |
| C | 11.549097000 | 6.928074000  | 8.196717000  |
| H | 10.814710000 | 7.594881000  | 7.729221000  |
| H | 12.509279000 | 7.436188000  | 8.142207000  |
| C | 11.644200000 | 5.651227000  | 7.400747000  |
| C | 11.196816000 | 5.623592000  | 6.078007000  |
| H | 10.735111000 | 6.511331000  | 5.652063000  |
| C | 11.337975000 | 4.471029000  | 5.306419000  |
| H | 10.987078000 | 4.463611000  | 4.278177000  |
| C | 11.918506000 | 3.328799000  | 5.855256000  |
| H | 12.023798000 | 2.428001000  | 5.257298000  |
| C | 12.358138000 | 3.347049000  | 7.178900000  |
| H | 12.807312000 | 2.459649000  | 7.616359000  |
| C | 12.222407000 | 4.501516000  | 7.944436000  |
| H | 12.547935000 | 4.517088000  | 8.978353000  |
| C | 16.916601000 | 14.022655000 | 14.767450000 |
| C | 17.784023000 | 12.483910000 | 12.986363000 |
| C | 19.000691000 | 11.844690000 | 13.321899000 |
| C | 19.778943000 | 11.290240000 | 12.301253000 |
| H | 20.705932000 | 10.787255000 | 12.562421000 |
| C | 19.393705000 | 11.362228000 | 10.969505000 |
| H | 20.013928000 | 10.924545000 | 10.192397000 |
| C | 18.203862000 | 12.003006000 | 10.643134000 |
| H | 17.901310000 | 12.070555000 | 9.602549000  |

|   |              |              |              |
|---|--------------|--------------|--------------|
| C | 17.384159000 | 12.557812000 | 11.626926000 |
| C | 19.480648000 | 11.705846000 | 14.752146000 |
| H | 18.842663000 | 12.331227000 | 15.381707000 |
| C | 20.928552000 | 12.163944000 | 14.950452000 |
| H | 21.184929000 | 12.148389000 | 16.013077000 |
| H | 21.102457000 | 13.179322000 | 14.586026000 |
| H | 21.630059000 | 11.503564000 | 14.429261000 |
| C | 19.339826000 | 10.256162000 | 15.222128000 |
| H | 18.320551000 | 9.895140000  | 15.089829000 |
| H | 19.608842000 | 10.161493000 | 16.280269000 |
| H | 19.998472000 | 9.596836000  | 14.646174000 |
| C | 16.124356000 | 13.295456000 | 11.216335000 |
| H | 15.478041000 | 13.347828000 | 12.095852000 |
| C | 15.339908000 | 12.588386000 | 10.111773000 |
| H | 15.879484000 | 12.579064000 | 9.159144000  |
| H | 14.387775000 | 13.099365000 | 9.933738000  |
| H | 15.116458000 | 11.552352000 | 10.376482000 |
| C | 16.465128000 | 14.732387000 | 10.805094000 |
| H | 16.917986000 | 15.289593000 | 11.630112000 |
| H | 15.567534000 | 15.273036000 | 10.485750000 |
| H | 17.176801000 | 14.741649000 | 9.971701000  |
| C | 15.226947000 | 15.143016000 | 16.196754000 |
| C | 14.734873000 | 16.220985000 | 15.411471000 |
| C | 13.991863000 | 17.225134000 | 16.034938000 |
| H | 13.612137000 | 18.049665000 | 15.439997000 |
| C | 13.703993000 | 17.187299000 | 17.396363000 |
| H | 13.118901000 | 17.979572000 | 17.854818000 |
| C | 14.166778000 | 16.121139000 | 18.156016000 |
| H | 13.941893000 | 16.078860000 | 19.218751000 |
| C | 14.925033000 | 15.098749000 | 17.581735000 |
| C | 14.901850000 | 16.236991000 | 13.902709000 |
| H | 15.872009000 | 15.797246000 | 13.661752000 |
| C | 13.818667000 | 15.378635000 | 13.246719000 |
| H | 13.851026000 | 14.335236000 | 13.577813000 |
| H | 13.926341000 | 15.367579000 | 12.158059000 |
| H | 12.825809000 | 15.766137000 | 13.488592000 |
| C | 14.875783000 | 17.639820000 | 13.293521000 |
| H | 13.874154000 | 18.081810000 | 13.331031000 |
| H | 15.160401000 | 17.593750000 | 12.236957000 |
| H | 15.563177000 | 18.320854000 | 13.804790000 |
| C | 15.411065000 | 13.959969000 | 18.455389000 |
| H | 16.005704000 | 13.305727000 | 17.812071000 |

|   |              |              |              |
|---|--------------|--------------|--------------|
| C | 14.244469000 | 13.137057000 | 19.011754000 |
| H | 13.622661000 | 13.736997000 | 19.685793000 |
| H | 14.610611000 | 12.273409000 | 19.578397000 |
| H | 13.592919000 | 12.770511000 | 18.212729000 |
| C | 16.311832000 | 14.457164000 | 19.589442000 |
| H | 17.145708000 | 15.052106000 | 19.207015000 |
| H | 16.730558000 | 13.613312000 | 20.149457000 |
| H | 15.753003000 | 15.079773000 | 20.297101000 |
| C | 18.935759000 | 15.068086000 | 13.771046000 |
| H | 18.568007000 | 14.604019000 | 12.858034000 |
| H | 19.805963000 | 14.490275000 | 14.095934000 |
| C | 19.369333000 | 16.480410000 | 13.472099000 |
| C | 20.711163000 | 16.845635000 | 13.596497000 |
| H | 21.435032000 | 16.105292000 | 13.927480000 |
| C | 21.122807000 | 18.146904000 | 13.308579000 |
| H | 22.170056000 | 18.417598000 | 13.411283000 |
| C | 20.191938000 | 19.097780000 | 12.895973000 |
| H | 20.508966000 | 20.113180000 | 12.675496000 |
| C | 18.849099000 | 18.739667000 | 12.767624000 |
| H | 18.117443000 | 19.474329000 | 12.442790000 |
| C | 18.443742000 | 17.439534000 | 13.052524000 |
| H | 17.400128000 | 17.162130000 | 12.962888000 |
| C | 18.191053000 | 15.708522000 | 16.022996000 |
| H | 17.281500000 | 15.814340000 | 16.611171000 |
| H | 18.519278000 | 16.717481000 | 15.762815000 |
| C | 19.258064000 | 15.013875000 | 16.834801000 |
| C | 18.981185000 | 13.797098000 | 17.468142000 |
| H | 17.996671000 | 13.354725000 | 17.355427000 |
| C | 19.947754000 | 13.162379000 | 18.242032000 |
| H | 19.713478000 | 12.222801000 | 18.734721000 |
| C | 21.213304000 | 13.733939000 | 18.386456000 |
| H | 21.968805000 | 13.240697000 | 18.991444000 |
| C | 21.502820000 | 14.938484000 | 17.749347000 |
| H | 22.486613000 | 15.387670000 | 17.853788000 |
| C | 20.528455000 | 15.574103000 | 16.979264000 |
| H | 20.750560000 | 16.518810000 | 16.489681000 |
| C | 12.215525000 | 12.502071000 | 15.807831000 |
| H | 12.906904000 | 13.365599000 | 15.900686000 |
| H | 12.689790000 | 11.662548000 | 16.344321000 |
| C | 10.974973000 | 12.873049000 | 16.631934000 |
| H | 10.453085000 | 13.733988000 | 16.207168000 |
| H | 11.220461000 | 13.125416000 | 17.672294000 |

|   |              |              |              |
|---|--------------|--------------|--------------|
| H | 10.257810000 | 12.044752000 | 16.665550000 |
| C | 10.943704000 | 13.503594000 | 12.829960000 |
| H | 11.719832000 | 13.941232000 | 12.186578000 |
| H | 10.206617000 | 13.089389000 | 12.131223000 |
| C | 10.266642000 | 14.614021000 | 13.640239000 |
| H | 9.386149000  | 14.238843000 | 14.176767000 |
| H | 9.918747000  | 15.448411000 | 13.013526000 |
| H | 10.933782000 | 15.043205000 | 14.397176000 |
| C | 10.440836000 | 10.424893000 | 13.980399000 |
| H | 9.916332000  | 10.934999000 | 14.801515000 |
| H | 10.645315000 | 9.449372000  | 14.453268000 |
| C | 9.434216000  | 10.252876000 | 12.835311000 |
| H | 9.051771000  | 11.226572000 | 12.518831000 |
| H | 8.572091000  | 9.631010000  | 13.106792000 |
| H | 9.872187000  | 9.803100000  | 11.930526000 |
| C | 13.098309000 | 8.032181000  | 15.086630000 |
| H | 12.403174000 | 7.583191000  | 14.352698000 |
| H | 12.469557000 | 8.697949000  | 15.699664000 |
| C | 13.517300000 | 6.825933000  | 15.943637000 |
| H | 14.025305000 | 6.072741000  | 15.334788000 |
| H | 12.658951000 | 6.332231000  | 16.416958000 |
| H | 14.209883000 | 7.107301000  | 16.746178000 |
| C | 16.480629000 | 7.919513000  | 14.453736000 |
| H | 17.136222000 | 8.062719000  | 15.324941000 |
| H | 16.190258000 | 6.861411000  | 14.492557000 |
| C | 17.264958000 | 8.183343000  | 13.165370000 |
| H | 16.642879000 | 7.989623000  | 12.288411000 |
| H | 18.164370000 | 7.558220000  | 13.068972000 |
| H | 17.589502000 | 9.225724000  | 13.081119000 |
| C | 15.069208000 | 10.098877000 | 16.519830000 |
| H | 14.283857000 | 10.750591000 | 16.943333000 |
| H | 14.835269000 | 9.155058000  | 17.032637000 |
| C | 16.445676000 | 10.558588000 | 17.029875000 |
| H | 16.884165000 | 11.398698000 | 16.469085000 |
| H | 17.169366000 | 9.746423000  | 16.940931000 |
| H | 16.424210000 | 10.866085000 | 18.082719000 |



**Table S4.** Computed natural charges for **3-Y**

|      | Natural charges |
|------|-----------------|
| Y1   | 1.60923         |
| Y2   | 1.54166         |
| Al3  | 1.77746         |
| Al4  | 1.77467         |
| C11  | -1.41005        |
| H12  | 0.29223         |
| C13  | -1.40166        |
| H14  | 0.29622         |
| C189 | -1.04480        |
| C196 | -1.08474        |
| C203 | -1.10306        |
| C210 | -1.06059        |
| C217 | -1.09717        |
| C224 | -1.09661        |

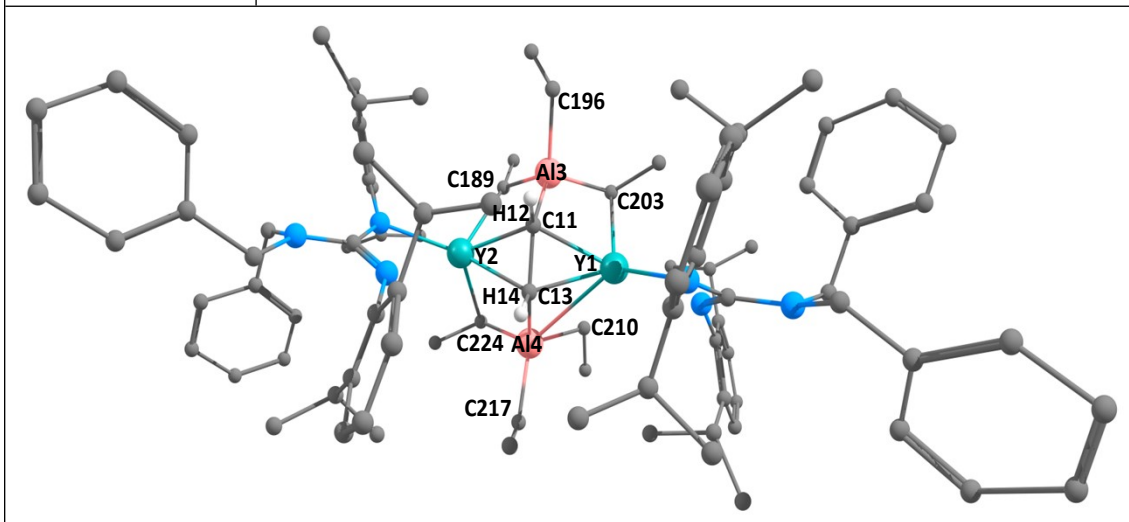**Table S5.** Computed Wiberg bond index for **3-Y**

| Atom Label | Wiberg bond index | Atom Label | Wiberg bond index | Atom Label | Wiberg bond index |
|------------|-------------------|------------|-------------------|------------|-------------------|
| Y1         | 0.0000            | Y1         | 0.0000            | Y1         | 0.0000            |
| C11        | 0.3577            | C13        | 0.4073            | C203       | 0.2152            |
| Atom Label | Wiberg bond index | Atom Label | Wiberg bond index | Atom Label | Wiberg bond index |
| Y1         | 0.0000            | Y1         | 0.0000            | Y1         | 0.0000            |
| C210       | 0.2175            | Al3        | 0.1096            | Al4        | 0.1121            |
| Atom Label | Wiberg bond index | Atom Label | Wiberg bond index | Atom Label | Wiberg bond index |

|            |                   |            |                   |            |                   |
|------------|-------------------|------------|-------------------|------------|-------------------|
| Y2         | 0.0000            | Y2         | 0.0000            | Y2         | 0.0000            |
| C11        | 0.4230            | C13        | 0.3878            | C189       | 0.2160            |
| Atom Label | Wiberg bond index | Atom Label | Wiberg bond index | Atom Label | Wiberg bond index |
| Y2         | 0.0000            | Y2         | 0.0000            | Y2         | 0.0000            |
| C224       | 0.2568            | Al3        | 0.0995            | Al4        | 0.1194            |
| Atom Label | Wiberg bond index | Atom Label | Wiberg bond index | Atom Label | Wiberg bond index |
| C11        | 0.0000            | Al3        | 0.0000            | Al3        | 0.0000            |
| C13        | 1.0170            | C189       | 0.3797            | C196       | 0.4980            |
| Atom Label | Wiberg bond index | Atom Label | Wiberg bond index | Atom Label | Wiberg bond index |
| Al3        | 0.0000            | Al4        | 0.0000            | Al4        | 0.0000            |
| C203       | 0.3537            | C210       | 0.3674            | C217       | 0.4942            |
| Atom Label | Wiberg bond index |            |                   |            |                   |
| Al4        | 0.0000            |            |                   |            |                   |
| C224       | 0.3281            |            |                   |            |                   |

#### Bonding orbitals in $Y_2Al_2$ core for **3-Y**

(1.74314) BD (1) Al3-C11

(13.19%) 0.3632\*Al3 s(40.63%) p 1.45( 58.98%) d 0.01( 0.38%)

(86.81%) 0.9317\*C11 s(47.48%) p 1.11( 52.52%) d 0.00( 0.00%)

(1.74246) BD (1) Al4-C13

(13.10%) 0.3620\*Al4 s(45.89%) p 1.17( 53.78%) d 0.01( 0.33%)

(86.90%) 0.9322\* C13 s(47.30%) p 1.11( 52.70%) d 0.00( 0.00%)

(1.94161) BD (1) C11-C13

(50.09%) 0.7078\* C11 s(27.65%) p 2.62(72.31%) d 0.00(0.04%)

(49.91%) 0.7065\* C13 s(27.57%) p 2.63(72.39%) d 0.00(0.04%)

**Table S6.** DFT computed NBO second order perturbation analysis for **3-Y**

| Donor NBO                                                                                                                                                  | Acceptor NBO                                                   | E(2)<br>kcal/mol |
|------------------------------------------------------------------------------------------------------------------------------------------------------------|----------------------------------------------------------------|------------------|
| (1.74314) BD (1)Al3-C11<br>(13.19%) 0.3632*Al3<br>s(40.63%) p 1.45( 58.98%) d 0.01(0.38%)<br>(86.81%) 0.9317*C11<br>s(47.48%) p 1.11(52.52%) d 0.00(0.00%) | (0.31853) LP*(1) Y1<br>s(0.25%) p3 0.48(7.52%) d 99.99(92.23%) | 23.98            |

|                                                                                                                                                               |                                                                 |       |
|---------------------------------------------------------------------------------------------------------------------------------------------------------------|-----------------------------------------------------------------|-------|
| (1.74314) BD (1)AI3-C11<br>(13.19%) 0.3632*AI3<br>s(40.63%) p 1.45( 58.98%) d 0.01(0.38%)<br>(86.81%) 0.9317*C11<br>s(47.48%) p 1.11(52.52%) d 0.00(0.00%)    | (0.18233) LP*(2) Y1<br>s(9.42%) p 1.67(15.68%) d 7.95(74.90%)   | 23.87 |
| (1.74314) BD (1)AI3-C11<br>(13.19%) 0.3632*AI3<br>s(40.63%) p 1.45( 58.98%) d 0.01(0.38%)<br>(86.81%) 0.9317*C11<br>s(47.48%) p 1.11(52.52%) d 0.00(0.00%)    | (0.17054) LP*(3) Y1<br>s(4.41%) p 6.57(28.99%) d 15.09(66.59%)  | 9.19  |
| (1.74314) BD (1)AI3-C11<br>(13.19%) 0.3632*AI3<br>s(40.63%) p 1.45( 58.98%) d 0.01(0.38%)<br>(86.81%) 0.9317*C11<br>s(47.48%) p 1.11(52.52%) d 0.00(0.00%)    | (0.13155) LP*(4) Y1<br>s(5.92%) p 5.06(29.94%) d 10.84(64.14%)  | 6.18  |
| (1.74246) BD (1)AI4-C13<br>(13.10%) 0.3620*AI4<br>s(45.89%) p 1.17(53.78%) d 0.01(0.33%)<br>(86.90%) 0.9322* C13<br>s(47.30%) p 1.11(52.70%) d 0.00(0.00%)    | (0.31853) LP*(1) Y1<br>s(0.25%) p 30.48(7.52%) d 99.99(92.23%)  | 29.13 |
| (1.74246) BD (1)AI4-C13<br>(13.10%) 0.3620*AI4<br>s(45.89%) p 1.17(53.78%) d 0.01(0.33%)<br>(86.90%) 0.9322* C13<br>s(47.30%) p 1.11(52.70%) d 0.00(0.00%)    | (0.18233) LP*(2) Y1<br>s(9.42%) p 1.67(15.68%) d 7.95(74.90%)   | 26.24 |
| (1.74246) BD (1)AI4-C13<br>(13.10%) 0.3620*AI4<br>s(45.89%) p 1.17(53.78%) d 0.01(0.33%)<br>(86.90%) 0.9322* C13<br>s(47.30%) p 1.11(52.70%) d 0.00(0.00%)    | (0.12239) LP*(5) Y1<br>s(3.16%) p 15.16(47.92%) d 15.47(48.92%) | 7.54  |
| (1.92270) BD (1) C11-H12<br>(63.98%) 0.7999* C11<br>s(24.61%) p 3.06(75.35%) d 0.00(0.04%)<br>(36.02%) 0.6001* H12<br>s(99.96%) p 0.00(0.04%)                 | (0.18233) LP*(2) Y1<br>s(9.42%) p 1.67(15.68%) d 7.95(74.90%)   | 5.91  |
| (1.94161) BD (1) C11-C13<br>(50.09%) 0.7078* C11<br>s(27.65%) p 2.62( 72.31%) d 0.00(0.04%)<br>(49.91%) 0.7065* C13<br>s(27.57%) p 2.63(72.39%) d 0.00(0.04%) | (0.18233) LP*(2) Y1<br>s(9.42%) p 1.67(15.68%) d 7.95(74.90%)   | 19.93 |

|                                                                                                                                                             |                                                                 |       |
|-------------------------------------------------------------------------------------------------------------------------------------------------------------|-----------------------------------------------------------------|-------|
| (1.92249) BD (1) C13-H14<br>(64.26%) 0.8016* C13<br>s(24.93%) p 3.01(75.03%) d 0.00( 0.04%)<br>(35.74%) 0.5979* H14<br>s(99.96%) p 0.00(0.04%)              | (0.18233) LP*(2) Y1<br>s(9.42%) p 1.67(15.68%) d 7.95(74.90%)   | 3.75  |
| (1.65430) LP (1) C11<br>s(0.18%) p 99.99(99.82%) d 0.02(0.00%)                                                                                              | (0.31853) LP*(1) Y1<br>s(0.25%) p 30.48(7.52%) d 99.99(92.23%)  | 10.30 |
| (1.64076) LP ( 1) C13<br>s(0.11%) p 99.99(99.88%) d 0.04(0.00%)                                                                                             | (0.31853) LP*(1) Y1<br>s(0.25%) p 30.48(7.52%) d 99.99(92.23%)  | 18.83 |
| (1.74314) BD (1)A13-C11<br>(13.19%) 0.3632*A13<br>s(40.63%) p 1.45(58.98%) d 0.01(0.38%)<br>(86.81%) 0.9317* C11<br>s(47.48%) p 1.11(52.52%) d 0.00(0.00%)  | (0.32916) LP*(1) Y2<br>s(0.11%) p 74.33(8.12%) d 99.99(91.77%)  | 31.74 |
| (1.74314) BD (1)A13-C11<br>(13.19%) 0.3632*A13<br>s(40.63%) p 1.45(58.98%) d 0.01(0.38%)<br>(86.81%) 0.9317* C11<br>s(47.48%) p 1.11(52.52%) d 0.00(0.00%)  | (0.20549) LP*(2) Y2<br>s(5.05%) p 3.26(16.46%) d15.53(78.49%)   | 10.70 |
| (1.74314) BD (1)A13-C11<br>(13.19%) 0.3632*A13<br>s(40.63%) p 1.45(58.98%) d 0.01(0.38%)<br>(86.81%) 0.9317* C11<br>s(47.48%) p 1.11(52.52%) d 0.00(0.00%)  | (0.19382) LP*(3) Y2<br>s(2.83%) p 2.38(6.72%) d 31.99(90.45%)   | 36.32 |
| (1.74314) BD (1)A13-C11<br>(13.19%) 0.3632*A13<br>s(40.63%) p 1.45(58.98%) d 0.01(0.38%)<br>(86.81%) 0.9317* C11<br>s(47.48%) p 1.11(52.52%) d 0.00(0.00%)  | (0.16938) LP*(4) Y2<br>s(0.31%) p 85.25(26.25%) d 99.99(73.45%) | 6.11  |
| (1.74314) BD (1)A13-C11<br>(13.19%) 0.3632*A13<br>s(40.63%) p 1.45(58.98%) d 0.01(0.38%)<br>(86.81%) 0.9317* C11<br>s(47.48%) p 1.11(52.52%) d 0.00(0.00%)  | (0.11134) LP*(6) Y2<br>s(2.98%) p 15.15(45.10%) d 17.44(51.92%) | 5.44  |
| (1.74246) BD (1)A14-C13<br>( 13.10%) 0.3620*A14<br>s(45.89%) p 1.17(53.78%) d 0.01(0.33%)<br>(86.90%) 0.9322* C13<br>s(47.30%) p 1.11(52.70%) d 0.00(0.00%) | (0.32916) LP*(1) Y2<br>s(0.11%) p 74.33(8.12%) d 99.99(91.77%)  | 37.65 |
| (1.74246) BD (1) A14-C13<br>(13.10%) 0.3620*A14<br>s(45.89%) p 1.17(53.78%) d 0.01(0.33%)                                                                   | (0.20549) LP*(2) Y2<br>s(5.05%) p 3.26(16.46%) d 15.53(78.49%)  | 41.51 |

|                                                                                                                                                              |                                                                 |       |
|--------------------------------------------------------------------------------------------------------------------------------------------------------------|-----------------------------------------------------------------|-------|
| (86.90%) 0.9322* C13<br>s(47.30%) p 1.11(52.70%) d 0.00(0.00%)                                                                                               |                                                                 |       |
| (1.74246) BD (1) AI4-C13<br>(13.10%) 0.3620*AI4<br>s(45.89%) p 1.17(53.78%) d 0.01(0.33%)<br>(86.90%) 0.9322* C13<br>s(47.30%) p 1.11(52.70%) d 0.00(0.00%)  | (0.19382) LP*(3) Y2<br>s(2.83%) p 2.38(6.72%) d 31.99(90.45%)   | 9.18  |
| (1.92270) BD ( 1) C11-H12<br>(63.98%) 0.7999* C11<br>s(24.61%) p 3.06(75.35%) d 0.00(0.04%)<br>(36.02%) 0.6001* H12<br>s(99.96%) p 0.00(0.04%)               | (0.11134) LP*(6) Y2<br>s(2.98%) p 15.15(45.10%) d 17.44(51.92%) | 4.86  |
| (1.94161) BD (1) C11-C13<br>(50.09%) 0.7078* C11<br>s(27.65%) p 2.62(72.31%) d 0.00(0.04%)<br>(49.91%) 0.7065* C13<br>s(27.57%) p 2.63(72.39%) d 0.00(0.04%) | (0.20549) LP*(2) Y2<br>s(5.05%) p 3.26(16.46%) d 15.53(78.49%)  | 9.23  |
| (1.94161) BD (1) C11-C13<br>(50.09%) 0.7078* C11<br>s(27.65%) p 2.62(72.31%) d 0.00(0.04%)<br>(49.91%) 0.7065* C13<br>s(27.57%) p 2.63(72.39%) d 0.00(0.04%) | (0.19382) LP*(3) Y2<br>s(2.83%) p 2.38(6.72%) d 31.99(90.45%)   | 13.86 |
| (1.92249) BD (1) C13-H14<br>(64.26%) 0.8016* C13<br>s(24.93%) p 3.01(75.03%) d 0.00(0.04%)<br>(35.74%) 0.5979* H14<br>s(99.96%) p 0.00(0.04%)                | (0.11134) LP*(6) Y2<br>s(2.98%) p 15.15(45.10%) d 17.44(51.92%) | 7.37  |
| (1.65430) LP (1) C11<br>s(0.18%) p 99.99(99.82%) d 0.02(0.00%)                                                                                               | (0.32916) LP*(1) Y2<br>s(0.11%) p 74.33(8.12%) d 99.99(91.77%)  | 16.20 |
| (1.65430) LP (1) C11<br>s(0.18%) p 99.99(99.82%) d 0.02(0.00%)                                                                                               | (0.09513) LP*(7) Y2<br>s(64.33%) p 0.24(15.28%) d 0.32(20.39%)  | 4.80  |
| (1.64076) LP (1) C13<br>s(0.11%) p 99.99(99.88%) d 0.04(0.00%)                                                                                               | (0.32916) LP*(1) Y2<br>s(0.11%) p 74.33(8.12%) d 99.99(91.77%)  | 10.15 |
| (1.64076) LP (1) C13<br>s(0.11%) p 99.99(99.88%) d 0.04(0.00%)                                                                                               | (0.09513) LP*(7) Y2<br>s(64.33%) p 0.24(15.28%) d 0.32(20.39%)  | 4.85  |
| (1.65430) LP (1) C11<br>s(0.18%) p99.99(99.82%) d 0.02(0.00%)                                                                                                | (0.28853) LP*(2) AI3<br>s(0.28%) p 99.99(99.13%) d 2.12(0.59%)  | 12.35 |
| (1.64076) LP (1) C13<br>s(0.11%) p 99.99(99.88%) d 0.04(0.00%)                                                                                               | (0.30753) LP*(2) AI4<br>s(1.58%) p 62.01(97.70%) d 0.46(0.72%)  | 13.03 |
| (1.64921) LP (1) C189<br>s(17.85%) p 4.60(82.15%) d 0.00(0.00%)                                                                                              | (0.32916) LP*(1) Y2<br>s(0.11%) p 74.33(8.12%) d 99.99(91.77%)  | 4.15  |

|                                                                    |                                                                 |        |
|--------------------------------------------------------------------|-----------------------------------------------------------------|--------|
| (1.64921) LP (1) C189<br>s(17.85%) p 4.60(82.15%) d 0.00(0.00%)    | (0.16938) LP*(4) Y2<br>s(0.31%) p 85.25(26.25%) d 99.99(73.45%) | 7.85   |
| (1.64921) LP (1) C189<br>s(17.85%) p 4.60(82.15%) d 0.00(0.00%)    | (0.38375) LP*(1) AI3<br>s(56.83%) p 0.76(43.00%) d 0.00(0.17%)  | 45.70  |
| (1.64921) LP (1) C189<br>s(17.85%) p 4.60(82.15%) d 0.00(0.00%)    | (0.28853) LP*(2) AI3<br>s(0.28%) p 99.99(99.13%) d 2.12(0.59%)  | 31.55  |
| (1.64921) LP (1) C189<br>s(17.85%) p 4.60(82.15%) d 0.00(0.00%)    | (0.21757) LP*(3) AI3<br>s(2.22%) p 43.98(97.62%) d 0.07(0.16%)  | 30.24  |
| (1.64239) LP (1) C196<br>s(17.87%) p 4.60(82.13%) d 0.00(0.00%)    | (0.38375) LP*(1) AI3<br>s(56.83%) p 0.76(43.00%) d 0.00(0.17%)  | 136.80 |
| (1.64239) LP (1) C196<br>s(17.87%) p 4.60(82.13%) d 0.00(0.00%)    | (0.21757) LP*(3) AI3<br>s(2.22%) p 43.98(97.62%) d 0.07(0.16%)  | 24.38  |
| (1.64800) LP (1) C203<br>s(17.11%) p 4.84(82.89%) d 0.00(0.00%)    | (0.17054) LP*(3) Y1<br>s(4.41%) p 6.57(28.99%) d 15.09(66.59%)  | 4.48   |
| (1.64800) LP (1) C203<br>s(17.11%) p 4.84(82.89%) d 0.00(0.00%)    | (0.12239) LP*(5) Y1<br>s(3.16%) p 15.16(47.92%) d 15.47(48.92%) | 4.48   |
| (1.64800) LP (1) C203<br>s(17.11%) p 4.84(82.89%) d 0.00(0.00%)    | (0.38375) LP*(1) AI3<br>s(56.83%) p 0.76(43.00%) d 0.00(0.17%)  | 20.10  |
| (1.64800) LP (1) C203<br>s(17.11%) p 4.84(82.89%) d 0.00(0.00%)    | (0.28853) LP*(2) AI3<br>s(0.28%) p 99.99(99.13%) d 2.12(0.59%)  | 38.92  |
| (1.64800) LP (1) C203<br>s(17.11%) p 4.84(82.89%) d 0.00(0.00%)    | (0.21757) LP*(3) AI3<br>s(2.22%) p 43.98(97.62%) d 0.07(0.16%)  | 23.83  |
| (1.63348) LP ( 1) C 210<br>s(17.51%) p 4.71(82.49%) d 0.00( 0.00%) | (0.13155) LP*(4) Y1<br>s(5.92%) p 5.06(29.94%) d 10.84(64.14%)  | 6.83   |
| (1.63348) LP ( 1) C210<br>s(17.51%) p 4.71(82.49%) d 0.00(0.00%)   | (0.35821) LP*(1) AI4<br>s(48.89%) p 1.04(50.95%) d 0.00(0.16%)  | 34.26  |
| (1.63348) LP ( 1) C210<br>s(17.51%) p 4.71(82.49%) d 0.00(0.00%)   | (0.30753) LP*(2) AI4<br>s(1.58%) p 62.01(97.70%) d 0.46(0.72%)  | 23.51  |
| (1.63348) LP ( 1) C210<br>s(17.51%) p 4.71(82.49%) d 0.00(0.00%)   | (0.20922) LP*(3) AI4<br>s(3.65%) p 26.37(96.18%) d 0.05(0.17%)  | 33.09  |
| (1.64131) LP (1) C217<br>s(17.58%) p 4.69(82.42%) d 0.00(0.00%)    | (0.35821) LP*(1) AI4<br>s(48.89%) p 1.04(50.95%) d 0.00(0.16%)  | 136.11 |
| (1.64131) LP (1) C217<br>s(17.58%) p 4.69(82.42%) d 0.00(0.00%)    | (0.30753) LP*(2) AI4<br>s(1.58%) p 62.01(97.70%) d 0.46(0.72%)  | 7.77   |
| (1.64131) LP (1) C217<br>s(17.58%) p 4.69(82.42%) d 0.00(0.00%)    | (0.20922) LP*(3) AI4<br>s(3.65%) p 26.37(96.18%) d 0.05(0.17%)  | 14.59  |
| (1.64018) LP (1) C224<br>s(17.41%) p 4.74(82.59%) d 0.00(0.00%)    | (0.20549) LP*(2) Y2<br>s(5.05%) p 3.26(16.46%) d 15.53(78.49%)  | 5.31   |
| (1.64018) LP (1) C224<br>s(17.41%) p 4.74(82.59%) d 0.00(0.00%)    | (0.19382) LP*(3) Y2<br>s(2.83%) p 2.38(6.72%) d 31.99(90.45%)   | 11.97  |
| (1.64018) LP (1) C224<br>s(17.41%) p 4.74(82.59%) d 0.00(0.00%)    | (0.35821) LP*(1) AI4<br>s(48.89%) p 1.04(50.95%) d 0.00(0.16%)  | 7.95   |

|                                                                 |                                                                |       |
|-----------------------------------------------------------------|----------------------------------------------------------------|-------|
| (1.64018) LP (1) C224<br>s(17.41%) p 4.74(82.59%) d 0.00(0.00%) | (0.30753) LP*(2) A14<br>s(1.58%) p 62.01(97.70%) d 0.46(0.72%) | 37.68 |
| (1.64018) LP (1) C224<br>s(17.41%) p 4.74(82.59%) d 0.00(0.00%) | (0.20922) LP*(3) A14<br>s(3.65%) p 26.37(96.18%) d 0.05(0.17%) | 25.16 |

## References

- [1] *SAINTPlus Data Reduction and Correction Program* v. 6.02a, Bruker AXS, Madison, WI, **2000**.
- [2] G. M. Sheldrick, *SADABS*, A Program for Empirical Absorption Correction, University of Göttingen, Göttingen, Germany, **1998**.
- [3] G. M. Sheldrick, *SHELXL-97*, Program for the Refinement of Crystal Structures, University of Göttingen, Göttingen, Germany, **1997**.
- [4] A. D. J. Becke, *Chem. Phys.* **1993**, *98*, 5648.
- [5] a) A. Bergner, M. Dolg, W. Kuechle, H. Stoll, H. Preuss, *Mol. Phys.* **1993**, *80*, 1431; b) D. Andrae, U. Haeussermann, M. Dolg, H. Stoll, H. Preuss, *Theor. Chim. Acta.*, **1990**, *77*, 123.
- [6] A. Hollwarth, M. Bohme, S. Dapprich, A. W. Ehlers, A. Gobbi, V. Jonas, K. F. Kohler, R. Stegmann, A. Veldkamp, G. Frenking, *J. Chem. Phys.* **1993**, *208*, 237.
- [7] a) G. A. Petersson, A. Bennett, T. G. Tensfeldt, M. A. Al-Laham, W. A. Shirley, J. Mantzaris, *J. Chem. Phys.*, **1998**, *89*, 2193; b) G. A. Petersson and M. A. Al-Laham, *J. Chem. Phys.*, **1991**, *94*, 6081.
- [8] S. Grimme, S. Ehrlich, L. Goerigk, *J. Comp. Chem.*, **2011**, *32*, 1456.
- [9] A. V. Marenich, C. J. Cramer, D. G. Truhlar, *J. Phys. Chem. B*, **2009**, *113*, 6378.
- [10] Gaussian 09, Revision D.01: M. J. Frisch, G. W. Trucks, H. B. Schlegel, G. E. Scuseria, M. A. Robb, J. R. Cheesman, G. Scalmani, V. Barone, B. Mennucci, G. A. Petersson, H. Nakatsuji, M. Caricato, X. Li, H. P. Hratchian, A. F. Izmaylov, J. Bloino, G. Zheng, J. L. Sonnenberg, M. Hada, M. Ehara, K. Toyota, R. Fukuda, J. Hasegawa, M. Ishida, T. Nakajima, Y. Honda, O. Kitao, H. Nakai, T. Vreven, J. A. Jr. Montgomery, J. E. Peralta, F. Ogliaro, M. Bearpark, J. J. Heyd, E. Brothers, K. N. Kudin, V. N. Staroverov, R. Kobayashi, J. Normand, K. Raghavachari, J. C. Burant, S. S. Iyengar, J. Tomasi, M. Cossi, N. Rega, M. J. Millam, M. Klene, J. E. Knox, J. B. Cross, V. Bakken, C. Adamo, J. Jaramillo, R. Gomperts, R. E. Stratmann, O. Yazyev, A. J. Austin, R. Cammi, C. Pomelli, J. W. Ochterski, R. L. Martin, K. Morokuma, V. G. Zakrzewski, G. A. Voth, P. Salvador, J. J. Dannenberg, S. Dapprich, A. D. Daniels, O. Farkas, J. B. Foresman, J. V. Ortiz, J. Cioslowski and D. J. Fox, Gaussian Inc., **2009**, Wallingford CT.
